# Supplementary material for: Presence and utility of intrinsically disordered regions in kinases
Source: Royal Society of Chemistry journal article supplement (doi:10.1039/c4mb00224e), 2014-07-30
Supplement: c4mb00224e3.xlsx [file c4mb00224e3.xlsx]

## Sheet: Table S1
Supplementary Table S1: Prediction of Intrinsically Disordered Regions in the Human Kinome identifies 83% of the kinases as IDPs
Name	SK	Group	Family	Subfamily	Uniprot ID	Start	End	Length	Start	End	Length	Start	End	Length	Start	End	Length	Start	End	Length	Start	End	Length	Start	End	Length	Start	End	Length	Start	End	Length	Start	End	Length	Start	End	Length	Start	End	Length	Start	End	Length	Start	End	Length	Start	End
SGK1	SK346	AGC	SGK		O00141	1	14	14	62	94	33	100	100	1	400	401	2	422	431	10
BMR1B	SK030	TKL	STKR	Type1	O00238	1	26	26	153	154	2	179	197	19	491	502	12
CDC7	SK066	Other	CDC7		O00311	1	30	30	246	246	1	248	258	11	312	348	37	466	480	15	571	574	4
eEF2K	SK117	Atypical	Alpha	eEF2K	O00418	1	60	60	62	72	11	353	480	128	654	661	8	681	689	9	691	696	6	710	725	16
PLK4	SK341	Other	PLK	SAK	O00444	1	10	10	264	308	45	321	452	132	510	510	1	512	543	32	569	577	9	590	590	1	804	861	58	864	867	4	870	872	3	874	878	5	927	928	2	931	931	1	961	970	10
STK25	SK395	STE	STE20	YSK	O00506	1	15	15	289	357	69	369	386	18	412	426	15
CTRO	SK695	AGC	DMPK	CRIK	O14578	1	14	14	46	48	3	370	371	2	373	400	28	402	402	1	404	404	1	452	506	55	513	600	88	616	618	3	638	708	71	710	710	1	716	716	1	719	721	3	727	727	1	730	819
RIOK3	SK606	Atypical	RIO	RIO3	O14730	1	15	15	98	98	1	115	153	39	161	166	6	218	230	13	310	316	7	509	519	11
MP2K7	SK230	STE	STE7	MEK7	O14733	1	92	92	137	143	7	152	163	12	204	207	4	365	368	4	401	408	8	412	412	1	416	419	4
CHK1	SK078	CAMK	CAMKL	CHK1	O14757	1	15	15	279	279	1	283	283	1	292	324	33	470	476	7
BCKDK	SK046	Atypical	PDHK	BCKDK	O14874	1	20	20	31	47	17	62	62	1	402	412	11
IKKb	SK176	Other	IKK		O14920	1	12	12	350	351	2	399	405	7	462	483	22	550	593	44	665	708	44	746	756	11
CSKP	SK064	CAMK	CASK		O14936	1	12	12	330	342	13	350	350	1	392	404	13	463	488	26	569	612	44	875	876	2	922	926	5
AURKA	SK407	Other	Aur		O14965	1	16	16	36	129	94	386	403	18
GAK	SK155	Other	NAK	GAK	O14976	1	25	25	73	74	2	338	338	1	341	358	18	711	1007	297	1010	1033	24	1040	1151	112	1154	1176	23	1179	1180	2	1182	1217	36	1302	1311	10
MAST4	SK701	AGC	MAST	MAST	O15021	1	177	177	185	317	133	336	336	1	338	368	31	386	390	5	456	462	7	541	571	31	810	812	3	873	1151	279	1231	1231	1	1233	1565	333	1575	1590	16	1594	1598	5	1609	1610	2	1612	1687
DCLK1	SK063	CAMK	DCAMKL		O15075	1	29	29	35	35	1	44	47	4	49	56	8	169	169	1	177	177	1	180	197	18	281	380	100	589	591	3	688	740	53
IKKa	SK175	Other	IKK		O15111	1	20	20	351	357	7	575	584	10	728	745	18
MUSK	SK247	TK	Musk		O15146	1	6	6	23	24	2	257	261	5	459	498	40	500	500	1	510	518	9	522	525	4	686	699	14	860	869	10
EphB6	SK132	TK	Eph		O15197	1	14	14	158	186	29	273	273	1	326	335	10	357	368	12	469	469	1	484	489	6	496	499	4	534	536	3	924	936	13	1011	1021	11
MK13	SK344	CMGC	MAPK	p38	O15264	1	10	10	301	332	32	342	348	7	352	365	14
PDPK1	SK276	AGC	PDK1		O15530	1	85	85	87	93	7	385	424	40	426	430	5	547	556	10
IRAK2	SK180	TKL	IRAK		O43187	1	10	10	116	116	1	118	189	72	300	307	8	508	556	49	575	575	1	616	625	10
M3K13	SK398	TKL	MLK	LZK	O43283	1	57	57	59	130	72	459	459	1	462	487	26	518	670	153	672	695	24	713	714	2	738	911	174	931	966	36
DAPK3	SK716	CAMK	DAPK	DAPK	O43293	1	18	18	33	37	5	43	64	22	109	110	2	281	322	42	366	367	2	372	416	45	418	419	2	422	423	2	445	454	10
M3K7	SK364	TKL	MLK	TAK1	O43318	1	23	23	65	67	3	300	300	1	302	412	111	432	504	73	547	606	60
RIPK2	SK329	TKL	RIPK		O43353	1	9	9	173	184	12	337	377	41	530	540	11
BUB1	SK409	Other	BUB		O43683	1	15	15	151	158	8	172	193	22	196	207	12	256	280	25	282	284	3	291	384	94	414	415	2	434	456	23	479	494	16	537	538	2	544	546	3	548	566	19	664	679	16	1070	1085
DYRK3	SK488	CMGC	DYRK	DYRK2	O43781	1	35	35	37	43	7	48	135	88	468	488	21	579	588	10
KALRN	SK533	CAMK	Trio		O60229	1	15	15	708	749	42	813	816	4	923	923	1	925	925	1	951	954	4	1089	1096	8	1110	1113	4	1266	1282	17	1594	1644	51	1723	1869	147	1897	1897	1	1900	1930	31	1960	1963	4	2242	2301
NuaK1	SK195	CAMK	CAMKL	NuaK	O60285	1	53	53	55	55	1	57	57	1	61	80	20	86	93	8	273	274	2	347	347	1	351	352	2	356	417	62	420	420	1	447	598	152	615	621	7	658	661	4
MAST3	SK196	AGC	MAST	MAST	O60307	1	172	172	174	175	2	254	260	7	337	363	27	375	380	6	672	951	280	955	957	3	1042	1309	268
BUB1B	SK053	Other	BUB		O60566	1	32	32	92	97	6	188	188	1	193	292	100	302	307	6	310	311	2	315	326	12	365	398	34	415	415	1	417	496	80	539	576	38	633	653	21	671	692	22	699	722	24	729	730
JAK2	SK186	TK	JakA		O60674	1	33	33	217	219	3	272	275	4	602	604	3	1051	1057	7	1123	1132	10
ROCK2	SK263	AGC	DMPK	ROCK	O75116	1	42	42	383	392	10	426	435	10	446	618	173	620	621	2	626	629	4	631	631	1	640	640	1	701	709	9	719	722	4	724	750	27	752	760	9	763	937	175	939	1011	73	1030	1030
ULK1	SK387	Other	ULK	ULK	O75385	1	14	14	277	628	352	630	634	5	640	641	2	650	653	4	655	807	153	809	809	1	815	821	7	829	842	14	844	844	1	863	874	12	1043	1050	8
ERN1	SK182	Other	IRE		O75460	1	6	6	406	441	36	467	477	11	487	563	77	727	728	2	849	851	3	964	977	14
KS6A5	SK242	AGC	RSK	MSK	O75582	1	28	28	93	96	4	98	101	4	284	285	2	288	302	15	692	699	8	737	802	66
KS6A4	SK243	AGC	RSK	MSK	O75676	1	25	25	68	68	1	78	85	8	285	285	1	346	348	3	379	379	1	381	381	1	383	387	5	609	617	9	669	694	26	717	772	56
STK16	SK506	Other	NAK	MPSK	O75716	1	6	6	8	11	4	56	60	5	257	258	2	268	268	1	275	275	1	277	305	29
PAK3	SK269	STE	STE20	PAKA	O75914	1	72	72	165	271	107	432	432	1	548	559	12
TRIO	SK376	CAMK	Trio		O75962	1	42	42	287	304	18	318	321	4	521	526	6	764	771	8	804	811	8	813	816	4	964	975	12	1268	1271	4	1276	1295	20	1606	1656	51	1729	1971	243	2000	2010	11	2123	2123	1	2283	2564
CDKL5	SK361	CMGC	CDKL		O76039	1	10	10	53	53	1	57	70	14	301	360	60	366	366	1	371	371	1	373	935	563	940	946	7	954	962	9	1023	1030	8
ST17B	SK487	CAMK	DAPK	DRAK	O94768	1	12	12	73	73	1	234	237	4	300	372	73
STK10	SK426	STE	STE20	SLK	O94804	1	23	23	309	524	216	542	542	1	545	968	424
KPCD3	SK489	CAMK	PKD		O94806	1	57	57	211	227	17	240	255	16	327	327	1	329	418	90	424	432	9	500	506	7	666	670	5	876	877	2	879	890	12
CDK14	SK282	CMGC	CDK	PFTAIRE	O94921	1	28	28	90	90	1	95	132	38	134	137	4	453	469	17
M3K6	SK503	STE	STE11	ASK	O95382	1	19	19	27	41	15	50	70	21	82	82	1	84	87	4	89	90	2	616	619	4	625	632	8	890	1036	147	1047	1052	6	1055	1055	1	1125	1166	42	1171	1174	4	1180	1183	4	1185	1185
OXSR1	SK428	STE	STE20	FRAY	O95747	1	16	16	278	279	2	295	434	140	441	445	5	459	460	2	524	527	4
M4K4	SK437	STE	STE20	MSN	O95819	1	18	18	294	294	1	298	859	562	883	923	41	1236	1239	4
LATS1	SK441	AGC	NDR		O95835	1	108	108	141	639	499	643	702	60	862	867	6	884	885	2	889	891	3	1037	1057	21	1067	1068	2	1096	1130	35
PAK4	SK430	STE	STE20	PAKB	O96013	1	17	17	89	305	217	576	591	16
CHK2	SK079	CAMK	RAD53		O96017	1	93	93	185	186	2	498	543	46
ABL1	SK006	TK	Abl		P00519	1	20	20	36	37	2	153	159	7	521	717	197	719	1023	305	1034	1036	3	1046	1048	3	1050	1055	6	1121	1130	10
EGFR	SK118	TK	EGFR		P00533	1	15	15	547	549	3	638	643	6	660	670	11	917	918	2	1025	1046	22	1049	1049	1	1097	1097	1	1099	1137	39	1201	1210	10
MOS	SK237	Other	MOS		P00540	1	44	44	126	130	5	157	162	6	337	346	10
RAF1	SK324	TKL	RAF	RAF	P04049	1	11	11	214	339	126	616	622	7	638	648	11
ErbB2	SK166	TK	EGFR		P04626	1	4	4	11	13	3	127	127	1	131	135	5	383	385	3	390	390	1	668	676	9	1038	1173	136	1193	1193	1	1196	1197	2	1199	1205	7	1221	1255	35
NTRK1	SK377	TK	Trk		P04629	1	18	18	393	415	23	473	486	14	551	552	2	615	618	4	787	796	10
KPCG	SK307	AGC	PKC	Alpha	P05129	1	16	16	91	91	1	93	93	1	317	322	6	324	324	1	342	347	6	545	548	4	553	559	7	595	598	4	626	633	8	684	697	14
KPCB	SK304	AGC	PKC	Alpha	P05771	1	30	30	32	35	4	89	95	7	99	101	3	229	238	10	303	306	4	310	310	1	313	340	28	532	534	3	539	545	7	608	634	27	636	639	4	668	671	4
INSR	SK178	TK	InsR		P06213	1	14	14	472	475	4	565	577	13	631	632	2	686	693	8	698	705	8	708	709	2	745	798	54	982	986	5	1119	1140	22	1306	1349	44	1363	1382	20
LCK	SK206	TK	Src	SrcB	P06239	1	13	13	496	509	14
FYN	SK153	TK	Src	SrcA	P06241	1	35	35	67	73	7	75	79	5	527	537	11
CDK1	SK065	CMGC	CDK	CDC2	P06493	1	9	9	11	11	1	39	44	6	290	297	8
FES	SK142	TK	Fer		P07332	1	27	27	50	106	57	110	174	65	195	195	1	287	359	73	376	432	57	434	434	1	535	537	3	761	764	4	812	822	11
FMS	SK094	TK	PDGFR		P07333	1	6	6	11	11	1	682	687	6	727	750	24	913	954	42	959	972	14
YES	SK393	TK	Src	SrcA	P07947	1	83	83	533	543	11
LYN	SK210	TK	Src	SrcB	P07948	1	62	62	503	512	10
RET	SK326	TK	Ret		P07949	1	12	12	549	549	1	664	668	5	689	701	13	762	767	6	826	846	21	1068	1069	2	1105	1114	10
IGF1R	SK174	TK	InsR		P08069	1	14	14	203	204	2	209	215	7	221	221	1	466	480	15	483	486	4	498	503	6	620	622	3	707	711	5	731	773	43	910	913	4	1100	1101	2	1103	1108	6	1279	1332	54	1342	1367
MET	SK227	TK	Met		P08581	1	7	7	1011	1024	14	1026	1026	1	1030	1032	3	1034	1034	1	1036	1045	10	1371	1390	20
HCK	SK164	TK	Src	SrcB	P08631	1	24	24	27	52	26	54	78	25	349	350	2	517	526	10
ROS	SK335	TK	Sev		P08922	1	7	7	180	188	9	273	274	2	288	295	8	300	305	6	402	403	2	554	554	1	659	660	2	1215	1215	1	1878	1882	5	1888	1891	4	2230	2243	14	2281	2304	24	2334	2347	14
PDGFRb	SK275	TK	PDGFR		P09619	1	16	16	55	56	2	65	72	8	300	301	2	425	428	4	465	466	2	469	476	8	484	489	6	703	712	10	730	732	3	734	734	1	745	746	2	780	782	3	1025	1106	82
FGR	SK148	TK	Src	SrcA	P09769	1	10	10	514	529	16
Wee1B	SK723	Other	WEE		P0C1S8	1	139	139	141	142	2	178	199	22	353	355	3	391	392	2	470	567	98
SBK2	SK581	Other	NKF1		P0C263	1	54	54	331	348	18
SG110	SK592	Other	NKF1		P0C264	1	30	30	187	208	22	260	267	8	271	272	2	274	275	2	289	292	4	318	359	42
ARAF	SK036	TKL	RAF	RAF	P10398	1	20	20	158	189	32	192	192	1	195	296	102	577	586	10	594	606	13
KIT	SK201	TK	PDGFR		P10721	1	8	8	11	12	2	14	19	6	24	42	19	73	77	5	735	738	4	960	976	17
BCR	SK047	Atypical	BCR		P11274	1	31	31	33	35	3	37	37	1	48	49	2	68	70	3	72	172	101	194	251	58	286	393	108	442	493	52	622	624	3	626	637	12	639	639	1	692	692	1	698	707	10	744	746
PIM1	SK291	CAMK	PIM		P11309	1	87	87	391	404	14
FGFR1	SK143	TK	FGFR		P11362	1	3	3	8	17	10	22	27	6	106	164	59	397	405	9	426	461	36	463	463	1	538	538	1	780	780	1	782	822	41
KPSH1	SK322	CAMK	PSK		P11801	1	13	13	62	95	34	363	424	62
CDK4	SK069	CMGC	CDK	CDK4	P11802	1	11	11	45	45	1	257	269	13	286	303	18
SRC	SK357	TK	Src	SrcA	P12931	1	64	64	68	75	8	77	78	2	522	522	1	526	536	11
INSRR	SK183	TK	InsR		P14616	1	6	6	8	8	1	461	463	3	467	469	3	586	586	1	588	588	1	612	617	6	665	697	33	733	749	17	751	764	14	1075	1091	17	1261	1297	37
BRAF	SK050	TKL	RAF	RAF	P15056	1	40	40	98	155	58	166	167	2	305	374	70	385	459	75	700	704	5	724	730	7	763	766	4
PHKg2	SK284	CAMK	PHK		P15735	1	11	11	391	391	1	397	406	10
ANPRA	SK034	RGC	RGC		P16066	1	20	20	29	29	1	278	289	12	532	540	9	558	559	2	811	820	10	1049	1061	13
PGFRa	SK274	TK	PDGFR		P16234	1	6	6	11	11	1	57	78	22	110	110	1	424	426	3	545	545	1	687	691	5	771	787	17	1025	1089	65
FER	SK140	TK	Fer		P16591	1	13	13	150	174	25	311	319	9	323	327	5	329	333	5	335	337	3	343	343	1	355	370	16	378	423	46	427	453	27	713	714	2	768	769	2	811	822	12
KPCA	SK303	AGC	PKC	Alpha	P17252	1	17	17	89	102	14	203	215	13	218	240	23	313	334	22	529	530	2	537	541	5	668	672	5
KAPCA	SK300	AGC	PKA		P17612	1	19	19	340	351	12
VGFR1	SK150	TK	VEGFR		P17948	1	4	4	22	33	12	270	274	5	276	282	7	500	500	1	753	753	1	783	789	7	942	992	51	1274	1274	1	1277	1278	2	1300	1303	4	1329	1332	4	1335	1338	4
E2AK2	SK119	Other	PEK	PKR	P19525	1	12	12	90	97	8	176	249	74	334	360	27	365	373	9	380	383	4	443	450	8	452	452	1	455	456	2	458	465	8	517	551	35
CK2a2	SK089	CMGC	CK2		P19784	1	14	14	77	81	5	345	350	6
ANPRB	SK035	RGC	RGC		P20594	1	19	19	260	269	10	351	356	6	987	990	4	1038	1047	10
MAK	SK211	CMGC	RCK		P20794	1	24	24	294	299	6	302	304	3	306	398	93	414	481	68	619	623	5
TAF1	SK772	Atypical	TAF1		P21675	1	33	33	113	123	11	140	213	74	215	218	4	248	250	3	257	277	21	300	317	18	319	335	17	409	412	4	423	427	5	508	537	30	540	561	22	635	674	40	805	812	8	834	834
EphA1	SK121	TK	Eph		P21709	1	6	6	237	237	1	292	292	1	302	310	9	317	333	17	344	360	17	366	366	1	427	444	18	458	458	1	474	474	1	527	541	15	561	594	34	826	832	7	907	910	4	973	976
FGFR2	SK144	TK	FGFR		P21802	1	3	3	8	9	2	128	152	25	401	409	9	424	459	36	539	541	3	776	799	24	803	803	1	808	821	14
ErbB3	SK167	TK	EGFR		P21860	1	7	7	13	13	1	16	25	10	658	668	11	694	695	2	983	986	4	992	1297	306	1333	1342	10
FGFR4	SK147	TK	FGFR		P22455	1	20	20	25	30	6	36	47	12	118	146	29	153	157	5	420	448	29	566	584	19	768	770	3	773	776	4	781	802	22
FGFR3	SK145	TK	FGFR		P22607	1	6	6	9	9	1	31	31	1	35	71	37	123	161	39	391	395	5	401	405	5	423	451	29	531	532	2	766	806	41
KAPCG	SK302	AGC	PKA		P22612	1	16	16	341	351	11
KAPCB	SK301	AGC	PKA		P22694	1	19	19	44	47	4	342	351	10
KS6B1	SK265	AGC	RSK	p70	P23443	1	70	70	72	72	1	74	74	1	76	86	11	135	145	11	386	407	22	451	525	75
JAK1	SK185	TK	JakA		P23458	1	11	11	19	21	3	175	177	3	341	369	29	384	388	5	392	392	1	396	398	3	610	613	4	1148	1154	7
KPCL	SK270	AGC	PKC	Eta	P24723	1	13	13	59	60	2	144	147	4	157	159	3	164	170	7	321	352	32	554	554	1	556	556	1	671	683	13
CDK2	SK067	CMGC	CDK	CDC2	P24941	1	11	11	289	298	10
GUC2C	SK171	RGC	RGC		P25092	1	7	7	304	305	2	313	316	4	451	452	2	493	505	13	526	528	3	1035	1048	14	1064	1073	10
ABRK1	SK045	AGC	GRK	BARK	P25098	1	19	19	21	23	3	26	27	2	127	128	2	390	398	9	664	689	26
AVR2A	SK010	TKL	STKR	Type2	P27037	1	6	6	11	13	3	123	133	11	175	182	8	309	315	7	351	354	4	503	513	11
MK03	SK134	CMGC	MAPK	ERK1	P27361	1	32	32	367	379	13
MARK3	SK096	CAMK	CAMKL	MARK	P27448	1	43	43	363	680	318	744	753	10
MK01	SK135	CMGC	MAPK	ERK1	P28482	1	15	15	347	360	14
EphA2	SK122	TK	Eph		P29317	1	6	6	296	309	14	313	330	18	388	390	3	436	456	21	463	463	1	476	478	3	482	482	1	527	533	7	550	558	9	561	569	9	898	901	4	969	970	2	973	976	4
EphA3	SK123	TK	Eph		P29320	1	18	18	295	296	2	309	331	23	457	457	1	524	540	17	569	577	9	970	983	14
EphA8	SK126	TK	Eph		P29322	1	11	11	318	318	1	320	334	15	421	422	2	530	537	8	571	578	8	614	617	4	619	630	12	991	1005	15
EphB2	SK128	TK	Eph		P29323	1	15	15	69	70	2	213	214	2	569	574	6	979	1055	77
LTK	SK209	TK	ALK		P29376	1	3	3	34	34	1	36	56	21	62	66	5	76	86	11	134	135	2	185	213	29	234	341	108	343	343	1	345	345	1	606	606	1	790	864	75
TYK2	SK385	TK	JakA		P29597	1	25	25	116	116	1	130	135	6	224	234	11	301	313	13	332	349	18	351	361	11	607	635	29	841	845	5	856	859	4	1099	1101	3	1178	1181	4	1184	1187	4
Wee1	SK391	Other	WEE		P30291	1	225	225	270	293	24	332	334	3	439	444	6	474	477	4	516	516	1	588	589	2	591	646	56
UFO	SK044	TK	Axl		P30530	1	10	10	29	33	5	270	294	25	302	303	2	313	314	2	504	528	25	813	853	41	858	894	37
MK04	SK137	CMGC	MAPK	ERK3	P31152	1	10	10	57	61	5	317	321	5	365	426	62	478	481	4	496	541	46	556	556	1	576	576	1	578	587	10
AKT1	SK018	AGC	Akt		P31749	1	11	11	110	141	32	386	388	3	390	392	3	396	400	5	447	480	34
AKT2	SK019	AGC	Akt		P31751	1	11	11	114	114	1	116	143	28	469	481	13
GPRK4	SK156	AGC	GRK	GRK	P32298	1	15	15	24	26	3	222	234	13	527	527	1	569	578	10
TTK	SK383	Other	TTK		P33981	1	59	59	61	61	1	193	204	12	208	208	1	213	234	22	248	248	1	300	321	22	325	345	21	355	355	1	357	409	53	411	415	5	444	444	1	459	459	1	694	716	23	835	857
RYK	SK340	TK	Ryk		P34925	1	64	64	252	252	1	255	301	47	598	604	7
GPRK5	SK157	AGC	GRK	GRK	P34947	1	29	29	208	211	4	222	222	1	224	227	4	531	590	60
TIE1	SK370	TK	Tie		P35590	1	4	4	277	280	4	282	284	3	525	528	4	590	604	15	641	644	4	746	758	13	823	825	3	1125	1127	3	1133	1138	6
ABRK2	SK478	AGC	GRK	BARK	P35626	1	28	28	385	385	1	389	398	10	540	540	1	592	595	4	673	688	16
VGFR3	SK151	TK	VEGFR		P35916	1	8	8	27	30	4	69	81	13	425	438	14	475	478	4	561	566	6	761	773	13	961	1001	41	1181	1221	41	1244	1250	7	1264	1291	28	1297	1363	67
VGFR2	SK402	TK	VEGFR		P35968	1	6	6	791	795	5	973	983	11	985	986	2	989	991	3	1187	1192	6	1194	1194	1	1244	1244	1	1248	1324	77	1337	1356	20
MP2K2	SK218	STE	STE7	MEK1	P36507	1	33	33	46	54	9	284	319	36	388	400	13
FLT3	SK149	TK	PDGFR		P36888	1	12	12	42	57	16	70	83	14	334	335	2	649	652	4	729	751	23	754	755	2	758	778	21	981	993	13
BMR1A	SK027	TKL	STKR	Type1	P36894	1	9	9	24	49	26	173	176	4	183	183	1	212	224	13	523	532	10
ACVR1D	SK028	TKL	STKR	Type1	P36896	1	13	13	23	25	3	114	118	5	155	157	3	159	159	1	496	505	10
TGFR1	SK029	TKL	STKR	Type1	P36897	1	13	13	114	115	2	156	162	7	186	191	6	493	503	11
ACVL1	SK025	TKL	STKR	Type1	P37023	1	23	23	96	99	4	105	117	13	137	139	3	172	172	1	181	187	7	490	503	14
TGFR2	SK369	TKL	STKR	Type2	P37173	1	13	13	195	196	2	549	567	19
CSK	SK095	TK	Csk		P41240	1	11	11	440	450	11
M3K8	SK093	STE	STE-Unique		P41279	1	15	15	54	66	13	210	213	4	369	440	72	457	458	2	460	467	8
KPCi	SK308	AGC	PKC	Iota	P41743	1	28	28	115	117	3	127	130	4	195	250	56	256	263	8	449	453	5	459	465	7	587	596	10
MTOR	SK152	Atypical	PIKK	FRAP	P42345	1	18	18	27	42	16	55	60	6	79	82	4	252	254	3	279	286	8	348	353	6	556	557	2	565	566	2	571	575	5	784	790	7	914	941	28	1126	1129	4	1291	1297	7	1367	1370
MATK	SK418	TK	Csk		P42679	1	13	13	61	61	1	217	219	3	466	507	42
TEC	SK366	TK	Tec		P42680	1	19	19	160	183	24	193	193	1	196	198	3	260	261	2	621	631	11
TXK	SK384	TK	Tec		P42681	1	11	11	22	23	2	26	75	50	80	83	4	524	527	4
ABL2	SK037	TK	Abl		P42684	1	56	56	62	75	14	197	207	11	557	563	7	579	686	108	689	689	1	691	692	2	730	743	14	754	926	173	928	928	1	953	1081	129	1084	1084	1	1172	1182	11
FRK	SK419	TK	Src	Frk	P42685	1	13	13	89	92	4	493	505	13
GPRK6	SK158	AGC	GRK	GRK	P43250	1	30	30	221	227	7	238	241	4	559	576	18
ZAP70	SK397	TK	Syk		P43403	1	9	9	11	20	10	256	329	74	375	389	15	604	619	16
SYK	SK363	TK	Syk		P43405	1	13	13	296	321	26	323	323	1	330	330	1	337	340	4	633	635	3
MK08	SK188	CMGC	MAPK	JNK	P45983	1	14	14	375	376	2	378	427	50
MK09	SK189	CMGC	MAPK	JNK	P45984	1	13	13	285	291	7	367	424	58
MP2K4	SK239	STE	STE7	MEK4	P45985	1	73	73	76	76	1	138	141	4	387	399	13
MP2K3	SK238	STE	STE7	MEK3	P46734	1	50	50	53	55	3	343	347	5
KC1A	SK082	CK1	CK1	CK1-A	P48729	1	13	13	154	156	3	160	160	1	200	203	4	304	337	34
KC1D	SK083	CK1	CK1	CK1-D	P48730	1	15	15	191	195	5	228	228	1	299	415	117
MAPK2	SK212	CAMK	MAPKAPK	MAPKAPK	P49137	1	34	34	48	52	5	331	331	1	385	400	16
CDK8	SK072	CMGC	CDK	CDK8	P49336	1	15	15	27	31	5	40	43	4	119	119	1	357	464	108
KC1E	SK084	CK1	CK1	CK1-D	P49674	1	15	15	191	195	5	299	416	118
CLK1	SK090	CMGC	CLK		P49759	1	151	151	381	385	5	476	484	9
CLK2	SK091	CMGC	CLK		P49760	1	149	149	219	219	1	384	386	3	486	499	14
CLK3	SK092	CMGC	CLK		P49761	1	138	138	155	158	4	161	292	132	344	344	1	525	525	1	623	638	16
GSK3A	SK162	CMGC	GSK		P49840	1	101	101	108	114	7	183	184	2	439	483	45
GSK3B	SK163	CMGC	GSK		P49841	1	54	54	56	56	1	120	120	1	376	420	45
STK19	SK756	Atypical	G11		P49842	1	9	9	36	89	54	125	151	27	361	368	8
CDK7	SK055	CMGC	CDK	CDK7	P50613	1	12	12	49	50	2	324	346	23
CDK9	SK295	CMGC	CDK	CDK9	P50750	1	6	6	339	372	34
BLK	SK049	TK	Src	SrcB	P51451	1	29	29	32	38	7	493	494	2	496	505	10
IRAK1	SK179	TKL	IRAK		P51617	1	15	15	108	127	20	137	196	60	367	382	16	511	511	1	534	538	5	540	597	58	602	662	61	680	712	33
KS6A3	SK337	AGC	RSK	RSK	P51812	1	47	47	367	367	1	395	397	3	456	459	4	624	624	1	731	740	10
BMX	SK417	TK	Tec		P51813	1	22	22	25	26	2	35	37	3	46	55	10	189	225	37	248	294	47	299	313	15	338	342	5	666	675	10
PRKX	SK313	AGC	PKA		P51817	1	40	40	99	99	1	352	353	2	355	358	4
GUC2F	SK099	RGC	RGC		P51841	1	9	9	365	370	6	488	490	3	540	558	19	702	705	4	837	853	17	1093	1108	16
NEK2	SK251	Other	NEK	NEK2	P51955	1	17	17	191	193	3	280	350	71	377	445	69
NEK3	SK252	Other	NEK	NEK1	P51956	1	12	12	281	364	84	366	366	1	386	387	2	389	390	2	445	447	3	449	506	58
NEK4	SK256	Other	NEK	NEK4	P51957	1	12	12	45	53	9	245	250	6	258	258	1	271	287	17	300	302	3	305	316	12	337	338	2	353	353	1	409	424	16	437	441	5	443	444	2	447	447	1	476	489	14	515	564
JAK3	SK187	TK	JakA		P52333	1	22	22	34	36	3	213	217	5	1056	1058	3	1108	1124	17
MP2K6	SK220	STE	STE7	MEK3	P52564	1	37	37	42	44	3	298	298	1	331	334	4
PLK1	SK315	Other	PLK	PLK1	P53350	1	40	40	43	55	13	345	368	24	383	400	18	586	603	18
DAPK1	SK103	CAMK	DAPK	DAPK	P53355	1	15	15	33	37	5	46	67	22	108	112	5	319	340	22	374	379	6	641	650	10	707	746	40	748	749	2	937	937	1	1406	1407	2	1411	1411	1	1414	1430	17
LIMK1	SK412	TKL	LISK	LIMK	P53667	1	20	20	173	174	2	176	194	19	196	197	2	254	325	72	500	501	2	635	647	13
LIMK2	SK207	TKL	LISK	LIMK	P53671	1	10	10	258	321	64	484	502	19	512	514	3	625	638	14
MK12	SK343	CMGC	MAPK	p38	P53778	1	14	14	355	367	13
MK10	SK190	CMGC	MAPK	JNK	P53779	1	3	3	8	9	2	323	324	2	400	464	65
AAPK2	SK033	CAMK	CAMKL	AMPK	P54646	1	12	12	355	371	17	373	396	24	481	485	5	495	495	1	499	537	39	543	552	10
EphB3	SK129	TK	Eph		P54753	1	29	29	301	302	2	304	304	1	315	316	2	318	318	1	322	342	21	461	470	10	538	556	19	589	592	4	989	998	10
EphA5	SK125	TK	Eph		P54756	1	39	39	56	58	3	344	363	20	627	630	4	1028	1037	10
EphB4	SK130	TK	Eph		P54760	1	3	3	6	10	5	311	326	16	340	340	1	345	354	10	443	450	8	513	515	3	517	536	20	559	560	2	570	573	4	767	771	5	773	774	2	776	777	2	967	987	21
EphB1	SK127	TK	Eph		P54762	1	22	22	287	287	1	290	290	1	292	292	1	318	321	4	354	354	1	416	416	1	431	435	5	437	437	1	477	493	17	781	781	1	974	984	11
EphA4	SK124	TK	Eph		P54764	1	3	3	7	8	2	320	328	9	424	431	8	434	434	1	563	582	20	886	908	23	974	986	13
HUNK	SK502	CAMK	CAMKL	HUNK	P57058	1	31	31	156	158	3	437	449	13	451	694	244	704	714	11
SIK1	SK604	CAMK	CAMKL	QIK	P57059	1	19	19	123	125	3	356	389	34	431	531	101	542	552	11	586	600	15	619	682	64	684	684	1	688	726	39	728	746	19	771	772	2	774	783	10
RIPK4	SK546	TKL	RIPK		P57078	1	10	10	325	366	42	368	369	2	376	456	81	517	524	8	529	533	5	818	832	15
CSK21	SK088	CMGC	CK2		P68400	1	18	18	77	78	2	332	391	60
SRPK2	SK359	CMGC	SRPK		P78362	1	24	24	36	62	27	242	453	212	464	516	53	592	592	1	686	688	3
KC1G2	SK086	CK1	CK1	CK1-G	P78368	1	43	43	229	233	5	347	388	42	393	400	8	403	403	1	405	415	11
PRKDC	SK113	Atypical	PIKK	DNAPK	P78527	1	9	9	11	11	1	240	242	3	499	515	17	590	594	5	840	846	7	946	949	4	1321	1328	8	1545	1550	6	2012	2088	77	2107	2119	13	2264	2265	2	2479	2479	1	2484	2497	14	2610	2611
M3K9	SK232	TKL	MLK	MLK	P80192	1	54	54	125	126	2	174	179	6	437	633	197	635	635	1	642	646	5	648	746	99	778	860	83	862	870	9	885	1083	199	1095	1095	1	1101	1104	4
CDK3	SK068	CMGC	CDK	CDC2	Q00526	1	11	11	294	305	12
CDKL1	SK203	CMGC	CDKL		Q00532	1	12	12	296	310	15	357	357	1
CDK6	SK071	CMGC	CDK	CDK4	Q00534	1	9	9	308	326	19
CDK5	SK070	CMGC	CDK	CDK5	Q00535	1	11	11	289	292	4
CDK16	SK271	CMGC	CDK	PCTAIRE	Q00536	1	123	123	478	496	19
CDK17	SK272	CMGC	CDK	PCTAIRE	Q00537	1	58	58	60	65	6	90	132	43	134	138	5	140	142	3	171	183	13	502	523	22
ROR1	SK333	TK	Ror		Q01973	1	20	20	23	33	11	284	285	2	395	398	4	426	442	17	463	466	4	570	587	18	748	801	54	804	810	7	821	822	2	824	824	1	830	894	65	927	937	11
ROR2	SK334	TK	Ror		Q01974	1	11	11	289	291	3	396	398	3	424	454	31	461	466	6	571	587	17	752	793	42	796	802	7	804	804	1	806	819	14	835	943	109
KPCE	SK306	AGC	PKC	Eta	Q02156	1	3	3	6	9	4	135	170	36	225	228	4	314	403	90	597	598	2	604	611	8	727	737	11
MP2K1	SK217	STE	STE7	MEK1	Q02750	1	54	54	281	310	30	381	393	13
TIE2	SK367	TK	Tie		Q02763	1	6	6	1119	1124	6
M3K10	SK233	TKL	MLK	MLK	Q02779	1	18	18	387	664	278	671	678	8	690	691	2	715	954	240
GUC2D	SK097	RGC	RGC		Q02846	1	23	23	105	124	20	327	335	9	433	436	4	438	442	5	444	444	1	521	550	30	834	851	18	1070	1103	34
KPCT	SK310	AGC	PKC	Delta	Q04759	1	5	5	337	344	8	346	346	1	352	353	2	359	366	8	580	582	3	668	706	39
ACVR1	SK026	TKL	STKR	Type1	Q04771	1	11	11	139	147	9	149	157	9	190	192	3	365	368	4	370	376	7	500	509	10
RON	SK332	TK	Met		Q04912	1	9	9	11	11	1	110	113	4	116	125	10	269	272	4	308	324	17	326	326	1	328	330	3	412	413	2	415	416	2	619	619	1	621	631	11	634	635	2	638	640	3	642	642
FAK1	SK138	TK	FAK		Q05397	1	33	33	406	417	12	669	753	85	811	925	115	1043	1052	10
KPCZ	SK311	AGC	PKC	Iota	Q05513	1	18	18	115	119	5	122	123	2	186	188	3	190	238	49	557	571	15	577	592	16
KPCD	SK305	AGC	PKC	Delta	Q05655	1	14	14	130	138	9	547	551	5	666	676	11
RN5A	SK729	Other	Other-Unique		Q05823	1	27	27	143	145	3	157	170	14	172	172	1	177	178	2	439	443	5	454	456	3	556	557	2	605	605	1	673	681	9	709	711	3	715	716	2	718	718	1	731	741	11
BTK	SK052	TK	Tec		Q06187	1	20	20	69	97	29	177	204	28	381	381	1	436	437	2	650	659	10
TYRO3	SK386	TK	Axl		Q06418	1	40	40	42	43	2	414	427	14	443	447	5	812	890	79
CDK18	SK273	CMGC	CDK	PCTAIRE	Q07002	1	133	133	412	412	1	458	472	15
ACK1	SK009	TK	Ack		Q07912	1	9	9	11	11	1	83	118	36	500	567	68	597	644	48	658	839	182	874	966	93	1028	1028	1	1031	1038	8
DDR1	SK400	TK	DDR		Q08345	1	8	8	14	22	9	24	24	1	44	70	27	119	126	8	322	332	11	395	395	1	398	398	1	403	413	11	434	444	11	450	450	1	471	567	97	718	737	20	895	895	1	905	913
ITK	SK184	TK	Tec		Q08881	1	22	22	35	36	2	46	52	7	149	152	4	157	164	8	169	169	1	564	567	4	611	620	10
DMPK	SK111	AGC	DMPK	GEK	Q09013	1	8	8	382	387	6	414	561	148	569	570	2	578	578	1	586	586	1	614	617	4	620	629	10
M4K2	SK048	STE	STE20	KHS	Q12851	1	13	13	254	268	15	283	303	21	313	328	16	343	343	1	345	352	8	362	464	103	673	674	2	764	769	6	802	803	2	816	820	5
M3K12	SK110	TKL	MLK	LZK	Q12852	1	75	75	77	78	2	425	463	39	470	472	3	474	515	42	517	859	343
MERTK	SK226	TK	Axl		Q12866	1	14	14	62	77	16	493	494	2	523	525	3	629	631	3	979	999	21
STK4	SK244	STE	STE20	MST	Q13043	1	24	24	218	221	4	299	394	96	398	407	10	411	420	10	459	459	1	466	487	22
AAPK1	SK032	CAMK	CAMKL	AMPK	Q13131	1	19	19	391	402	12	479	538	60	553	559	7
PAK1	SK267	STE	STE20	PAKA	Q13153	1	77	77	134	259	126	263	264	2	419	419	1	533	545	13
MP2K5	SK219	STE	STE7	MEK5	Q13163	1	3	3	7	10	4	123	141	19	147	152	6	175	177	3	403	409	7	432	434	3	436	448	13
MK07	SK408	CMGC	MAPK	ERK5	Q13164	1	31	31	349	350	2	352	356	5	405	405	1	407	732	326	749	752	4	755	773	19	784	816	33
PAK2	SK268	STE	STE20	PAKA	Q13177	1	43	43	56	79	24	142	150	9	156	237	82	242	244	3	397	398	2	511	524	14
STK3	SK245	STE	STE20	MST	Q13188	1	20	20	215	216	2	295	422	128	429	429	1	456	491	36
MAP3K1	SK221	STE	STE11	MEKK1	Q13233	1	213	213	215	309	95	394	395	2	398	444	47	499	539	41	597	633	37	920	1001	82	1012	1012	1	1014	1203	190	1208	1208	1	1210	1210	1	1223	1224	2	1496	1497	2	1503	1512	10
KGP2	SK075	AGC	PKG		Q13237	1	59	59	94	96	3	115	157	43	411	421	11	746	762	17
PTK7	SK411	TK	CCK4		Q13308	1	16	16	169	169	1	174	186	13	190	190	1	528	531	4	687	702	16	721	727	7	735	783	49	786	794	9	1005	1010	6	1051	1070	20
ATM	SK038	Atypical	PIKK	ATM	Q13315	1	15	15	23	24	2	47	52	6	289	291	3	370	378	9	472	477	6	705	711	7	834	879	46	1000	1001	2	1007	1016	10	1130	1145	16	1309	1309	1	1662	1662	1	1877	1881	5	1903	1907
ILK	SK177	TKL	MLK	ILK	Q13418	1	14	14	173	179	7	184	184	1	214	218	5	369	369	1	442	452	11
ROCK1	SK331	AGC	DMPK	ROCK	Q13464	1	21	21	370	378	9	399	426	28	428	428	1	430	624	195	640	641	2	643	700	58	703	703	1	708	708	1	711	741	31	743	807	65	829	843	15	846	846	1	855	1089	235	1096	1118
TNK1	SK375	TK	Ack		Q13470	1	8	8	11	11	1	82	83	2	86	103	18	365	367	3	370	370	1	448	591	144	661	666	6
PRP4B	SK321	CMGC	DYRK	PRP4	Q13523	1	594	594	619	623	5	1002	1007	6
ATR	SK039	Atypical	PIKK	ATR	Q13535	1	24	24	415	458	44	1005	1007	3	1104	1105	2	1164	1168	5	1462	1472	11	1871	1875	5	2330	2332	3	2341	2344	4	2350	2356	7	2572	2572	1	2641	2644	4
RIPK1	SK328	TKL	RIPK		Q13546	1	24	24	168	174	7	205	207	3	303	305	3	308	308	1	321	459	139	479	480	2	555	555	1	667	671	5
KCC2B	SK058	CAMK	CAMK2		Q13554	1	11	11	54	57	4	314	314	1	316	335	20	339	545	207	627	641	15	657	658	2	660	666	7
KCC2G	SK060	CAMK	CAMK2		Q13555	1	11	11	54	59	6	313	431	119	518	534	17	549	558	10
KCC2D	SK703	CAMK	CAMK2		Q13557	1	11	11	54	58	5	320	348	29	440	452	13	490	499	10
DYR1A	SK234	CMGC	DYRK	DYRK1	Q13627	1	15	15	23	77	55	80	80	1	104	107	4	115	145	31	409	423	15	429	442	14	482	689	208	731	763	33
AVR2B	SK011	TKL	STKR	Type2	Q13705	1	12	12	120	135	16	161	164	4	166	181	16	348	355	8	499	512	14
BMPR2	SK365	TKL	STKR	Type2	Q13873	1	11	11	130	146	17	177	195	19	367	368	2	510	543	34	546	546	1	549	650	102	662	705	44	745	777	33	809	823	15	851	851	1	856	981	126	1003	1011	9	1034	1038	5
PTK6	SK051	TK	Src	SRM	Q13882	1	11	11	436	451	16
KGP1	SK073	AGC	PKG		Q13976	1	30	30	51	57	7	71	76	6	84	91	8	407	410	4	556	560	5	643	671	29
CDK13	SK076	CMGC	CDK	CRK7	Q14004	1	543	543	565	599	35	602	634	33	648	693	46	1013	1014	2	1016	1087	72	1089	1089	1	1136	1181	46	1191	1298	108	1306	1320	15	1334	1401	68	1440	1512	73
KCC1A	SK056	CAMK	CAMK1		Q14012	1	11	11	322	338	17	357	370	14
IKKe	SK193	Other	IKK		Q14164	1	11	11	508	533	26	656	677	22	706	716	11
FAK2	SK424	TK	FAK		Q14289	1	26	26	382	382	1	388	395	8	397	397	1	708	730	23	735	764	30	772	804	33	808	816	9	852	852	1	933	935	3	999	1009	11
FASTK	SK139	Atypical	FAST		Q14296	1	49	49	66	85	20	127	135	9	186	192	7	194	197	4	199	199	1	202	210	9	226	232	7	451	451	1	457	485	29	535	549	15
MELK	SK298	CAMK	CAMKL	MELK	Q14680	1	11	11	438	469	32	532	538	7	543	559	17	643	643	1	645	651	7
PDK1	SK277	Atypical	PDHK	PDHK	Q15118	1	53	53	203	214	12	251	255	5	426	436	11
PDK2	SK278	Atypical	PDHK	PDHK	Q15119	1	10	10	311	320	10	397	407	11
PDK3	SK279	Atypical	PDHK	PDHK	Q15120	1	15	15	310	310	1	312	313	2	385	406	22
CDK10	SK294	CMGC	CDK	CDK10	Q15131	1	12	12	73	74	2	335	360	26
KPCD1	SK309	CAMK	PKD		Q15139	1	38	38	203	207	5	211	252	42	330	423	94	433	435	3	497	499	3	507	522	16	888	912	25
STK38	SK249	AGC	NDR		Q15208	1	27	27	30	31	2	34	88	55	261	273	13	459	465	7
ErbB4	SK168	TK	EGFR		Q15303	1	6	6	8	14	7	20	26	7	667	674	8	875	878	4	999	999	1	1002	1004	3	1006	1020	15	1022	1022	1	1039	1056	18	1124	1195	72	1299	1308	10
KS6A2	SK338	AGC	RSK	RSK	Q15349	1	35	35	104	104	1	106	108	3	358	358	1	362	364	3	386	389	4	450	454	5	613	617	5	718	733	16
EphA7	SK416	TK	Eph		Q15375	1	9	9	11	11	1	26	27	2	161	163	3	299	308	10	310	310	1	316	321	6	486	505	20	992	998	7
KS6A1	SK336	AGC	RSK	RSK	Q15418	1	37	37	303	304	2	309	311	3	358	358	1	360	361	2	389	396	8	452	455	4	614	621	8	704	735	32
TESK1	SK368	TKL	LISK	TESK	Q15569	1	51	51	322	580	259	609	626	18
MYLK	SK231	CAMK	MLCK		Q15746	1	27	27	264	280	17	283	429	147	835	897	63	904	1101	198	1187	1249	63	1278	1278	1	1281	1293	13	1415	1459	45	1469	1469	1	1661	1667	7	1722	1792	71	1897	1914	18
MK11	SK342	CMGC	MAPK	p38	Q15759	1	11	11	314	331	18	340	364	25
SPEG	SK537	CAMK	Trio		Q15772	1	41	41	129	230	102	241	245	5	266	723	458	785	804	20	809	886	78	890	897	8	919	919	1	1159	1194	36	1228	1236	9	1367	1392	26	1902	2571	670	2757	2759	3	2766	2974	209	3250	3267
LKB1	SK208	CAMK	CAMKL	LKB	Q15831	1	15	15	72	72	1	82	105	24	314	328	15	362	364	3	372	382	11	394	433	40
RK	SK327	AGC	GRK	GRK	Q15835	1	10	10	51	51	1	53	56	4	348	351	4	538	563	26
NTRK3	SK379	TK	Trk		Q16288	1	8	8	60	74	15	423	428	6	458	462	5	475	476	2	490	497	8	833	839	7
PKN1	SK317	AGC	PKN		Q16512	1	16	16	25	71	47	93	124	32	170	177	8	184	209	26	246	290	45	292	293	2	295	295	1	340	391	52	528	606	79	610	610	1	805	808	4	813	819	7	852	867	16	909	924
PKN2	SK318	AGC	PKN		Q16513	1	18	18	41	77	37	113	142	30	151	151	1	153	153	1	162	174	13	298	322	25	362	393	32	550	650	101	847	850	4	855	861	7	898	899	2	956	956	1	961	969	9	975	977
MK14	SK264	CMGC	MAPK	p38	Q16539	1	15	15	313	316	4	342	360	19
KCC4	SK061	CAMK	CAMK1		Q16566	1	22	22	332	388	57	416	416	1	435	461	27	463	473	11
NTRK2	SK378	TK	Trk		Q16620	1	11	11	165	165	1	243	244	2	257	260	4	409	430	22	460	466	7	471	471	1	473	501	29	577	577	1	580	580	1	587	587	1	644	647	4	814	816	3	819	822	4
MAPK3	SK213	CAMK	MAPKAPK	MAPKAPK	Q16644	1	37	37	351	382	32
PDK4	SK280	Atypical	PDHK	PDHK	Q16654	1	12	12	14	14	1	108	109	2	266	270	5	402	411	10
MK06	SK136	CMGC	MAPK	ERK3	Q16659	1	11	11	487	487	1	490	496	7	504	519	16	563	577	15	638	666	29	688	688	1	693	721	29
AMHR2	SK228	TKL	STKR	Type2	Q16671	1	6	6	11	11	1	106	143	38	165	172	8	179	188	10	366	369	4	371	378	8	426	432	7	547	550	4	553	573	21
PHKg1	SK283	CAMK	PHK		Q16816	1	14	14	20	20	1	358	360	3	362	362	1	383	387	5
DDR2	SK410	TK	DDR		Q16832	1	3	3	9	9	1	12	13	2	63	63	1	65	66	2	120	124	5	370	382	13	416	437	22	443	478	36	480	483	4	485	487	3	511	517	7	667	679	13	851	855	5
AAK1	SK422	Other	NAK	BIKE	Q2M2I8	1	37	37	323	324	2	338	640	303	649	703	55	718	718	1	721	727	7	746	763	18	810	823	14	832	878	47	917	921	5	923	961	39
MYLK3	SK536	CAMK	MLCK		Q32MK0	1	19	19	31	31	1	66	81	16	149	495	347	777	784	8	806	819	14
LRRK1	SK698	TKL	LRRK		Q38SD2	1	77	77	513	515	3	531	539	9	861	862	2	874	874	1	878	878	1	997	1001	5	1050	1055	6	1226	1228	3	1237	1254	18	1798	1799	2	1801	1809	9	1834	1905	72	2001	2015	15
ADCK5	SK780	Atypical	ABC1	ABC1-B	Q3MIX3	1	11	11	15	15	1	71	74	4	571	580	10
PKDCC	SK460	Other	SgK493		Q504Y2	1	9	9	11	11	1	16	147	132	400	405	6	482	493	12
SBK	SK650	Other	NKF1		Q52WX2	1	35	35	308	424	117
M3K19	SK573	STE	STE11	MEKK15	Q56UN5	1	102	102	131	132	2	147	150	4	188	188	1	250	269	20	348	376	29	380	383	4	389	432	44	500	500	1	517	561	45	563	564	2	585	614	30	619	626	8	693	735	43	742	769
TNI3K	SK494	TKL	MLK	HH498	Q59H18	1	14	14	16	16	1	223	224	2	375	379	5	728	760	33	764	764	1	766	769	4	779	794	16	816	835	20
EPHAA	SK627	TK	Eph		Q5JZY3	1	9	9	167	171	5	320	366	47	433	435	3	556	564	9	791	795	5	999	1008	10
CDKL4	SK466	CMGC	CDKL		Q5MAI5	1	12	12	288	315	28
LRRK2	SK690	TKL	LRRK		Q5S007	1	16	16	28	29	2	319	346	28	518	518	1	766	770	5	881	908	28	945	992	48	1367	1374	8	2118	2119	2	2399	2407	9	2516	2527	12
M3KL4	SK691	TKL	MLK	MLK	Q5TCX8	1	58	58	104	115	12	154	155	2	157	158	2	216	235	20	427	481	55	485	577	93	586	587	2	597	617	21	668	719	52	746	861	116	864	865	2	868	870	3	873	969	97	1021	1036
TTBK1	SK526	CK1	TTBK		Q5TCY1	1	20	20	213	219	7	319	334	16	350	529	180	532	532	1	544	678	135	687	697	11	710	914	205	947	1321	375
OBSCN	SK601	CAMK	Trio		Q5VST9	1	11	11	137	166	30	173	254	82	512	512	1	1210	1214	5	1577	1578	2	1696	1700	5	1702	1703	2	1764	1768	5	1999	1999	1	2516	2518	3	2570	2570	1	2584	2585	2	3405	3406	2	3409	3410
MRCKa	SK299	AGC	DMPK	GEK	Q5VT25	1	11	11	394	395	2	451	451	1	453	454	2	456	468	13	502	523	22	526	527	2	530	657	128	717	718	2	728	781	54	783	783	1	855	872	18	919	922	4	928	928	1	931	948
MRCKG	SK112	AGC	DMPK	GEK	Q6DT37	1	20	20	371	373	3	375	385	11	400	412	13	425	678	254	729	807	79	811	811	1	817	886	70	888	889	2	891	891	1	904	907	4	986	986	1	1268	1278	11	1391	1429	39	1431	1431
TTBK2	SK453	CK1	TTBK		Q6IQ55	1	14	14	201	206	6	295	295	1	297	323	27	342	382	41	402	417	16	419	420	2	474	477	4	479	481	3	514	531	18	567	592	26	594	596	3	609	609	1	624	630	7	632	639
STYK1	SK530	TK	TK-Unique		Q6J9G0	1	9	9	11	11	1	45	67	23	358	374	17	417	422	6
MAST2	SK216	AGC	MAST	MAST	Q6P0Q8	1	65	65	103	163	61	165	258	94	266	329	64	396	404	9	476	511	36	812	812	1	816	1102	287	1196	1196	1	1199	1720	522	1733	1733	1	1740	1746	7	1749	1798	50
KCC1B	SK662	CAMK	CAMK1		Q6P2M8	1	17	17	315	343	29
NEK5	SK558	Other	NEK	NEK1	Q6P3R8	1	6	6	8	11	4	325	325	1	331	340	10	417	496	80	507	510	4	512	519	8	546	570	25	573	574	2	595	603	9	683	688	6	690	708	19
SCYL2	SK475	Other	SCY1		Q6P3W7	1	16	16	295	295	1	440	444	5	619	622	4	624	625	2	627	635	9	656	678	23	680	929	250
PKN3	SK511	AGC	PKN		Q6P5Z2	1	105	105	123	123	1	138	139	2	162	184	23	196	277	82	301	303	3	319	323	5	464	560	97	878	889	12
ULK3	SK450	Other	ULK	ULK	Q6PHR2	1	11	11	249	251	3	254	255	2	277	279	3	364	376	13	389	389	1	391	397	7	450	451	2	453	472	20
TSSK4	SK534	CAMK	TSSK		Q6SA08	1	12	12	318	328	11
KSR2	SK605	TKL	RAF	KSR	Q6VAB6	1	21	21	235	302	68	304	337	34	347	351	5	353	361	9	375	379	5	382	384	3	497	498	2	500	550	51	552	567	16	604	650	47	940	950	11
DUSTY	SK516	Other	SgK496		Q6XUX3	1	46	46	70	72	3	75	80	6	141	144	4	288	299	12	410	436	27	446	452	7	615	615	1	914	929	16
LMTK1	SK413	TK	Lmr		Q6ZMQ8	1	21	21	64	69	6	80	88	9	413	414	2	416	439	24	538	631	94	633	635	3	637	742	106	748	749	2	754	1215	462	1247	1374	128
M3K15	SK681	STE	STE11	ASK	Q6ZN16	1	85	85	174	174	1	258	258	1	380	380	1	926	926	1	929	1001	73	1003	1010	8	1147	1211	65	1300	1313	14
NEK10	SK645	Other	NEK	NEK10	Q6ZWH5	1	32	32	54	57	4	239	241	3	378	378	1	558	568	11	618	621	4	794	813	20	824	824	1	838	838	1	840	957	118	1078	1078	1	1082	1088	7	1107	1130	24	1156	1172	17
ERN2	SK498	Other	IRE		Q76MJ5	1	12	12	147	154	8	187	193	7	195	195	1	323	325	3	332	350	19	382	394	13	413	429	17	457	458	2	477	511	35	799	804	6	910	926	17
MARK2	SK120	CAMK	CAMKL	MARK	Q7KZI7	1	50	50	373	719	347	779	788	10
TAOK1	SK436	STE	STE20	TAO	Q7L7X3	1	14	14	322	672	351	677	721	45	735	737	3	739	740	2	744	760	17	810	886	77	895	1001	107
STRAA	SK433	STE	STE20	STLK	Q7RTN6	1	11	11	33	34	2	36	54	19	304	353	50	362	366	5	408	410	3	419	431	13
NRK	SK440	STE	STE20	MSN	Q7Z2Y5	1	13	13	85	86	2	384	404	21	411	585	175	616	619	4	645	797	153	800	862	63	915	1164	250	1288	1294	7	1299	1299	1	1532	1537	6	1572	1572	1	1574	1582	9
ADCK2	SK712	Atypical	ABC1	ABC1-C	Q7Z695	1	6	6	8	9	2	83	84	2	292	292	1	295	298	4	460	465	6	617	626	10
PXK	SK528	Other	Slob		Q7Z7A4	1	14	14	28	29	2	426	578	153
M3K11	SK356	TKL	MLK	MLK	Q80XI6	1	38	38	149	152	4	408	499	92	533	850	318
NEK8	SK476	Other	NEK	NEK8	Q86SG6	1	9	9	11	11	1	276	313	38	482	499	18	599	600	2	602	603	2	677	692	16
ALPK2	SK754	Atypical	Alpha	Alpha-Unclassified	Q86TB3	1	13	13	106	210	105	246	264	19	288	309	22	389	391	3	405	689	285	693	695	3	719	753	35	772	797	26	866	883	18	898	898	1	900	911	12	920	978	59	986	994	9	996	998
ADCK1	SK401	Atypical	ABC1	ABC1-B	Q86TW2	1	12	12	525	530	6
TLK2	SK374	Other	TLK		Q86UE8	1	149	149	175	298	124	327	392	66	443	456	14	631	633	3	749	772	24
ST32C	SK469	AGC	YANK		Q86UX6	1	85	85	389	486	98
PIM3	SK200	CAMK	PIM		Q86V86	1	6	6	11	13	3	312	326	15
VRK2	SK390	CK1	VRK		Q86Y07	1	13	13	200	202	3	338	365	28	382	411	30	415	416	2	418	422	5	502	508	7
SG223	SK643	Other	NKF3		Q86YV5	1	11	11	38	95	58	142	157	16	193	195	3	200	200	1	206	207	2	211	282	72	291	293	3	301	303	3	322	322	1	325	356	32	359	359	1	362	363	2	367	460	94	486	692
MYLK4	SK709	CAMK	MLCK		Q86YV6	1	11	11	41	70	30	145	146	2	369	388	20
HIPK1	SK169	CMGC	DYRK	HIPK	Q86Z02	1	24	24	31	38	8	42	42	1	52	59	8	93	95	3	100	100	1	162	174	13	480	482	3	577	624	48	802	809	8	831	977	147	1010	1161	152	1184	1185	2	1188	1189	2	1201	1210
KCC1D	SK572	CAMK	CAMK1		Q8IU85	1	18	18	326	342	17	345	348	4	351	385	35
VRK3	SK535	CK1	VRK		Q8IV63	1	4	4	7	7	1	48	48	1	50	164	115	166	166	1	465	474	10
M4K3	SK427	STE	STE20	KHS	Q8IVH8	1	15	15	257	261	5	315	315	1	317	362	46	402	542	141	765	774	10	807	810	4	873	878	6	885	886	2	888	894	7
KSR1	SK205	TKL	RAF	KSR	Q8IVT5	1	37	37	39	41	3	171	248	78	254	337	84	426	490	65	537	597	61	910	921	12
CDKL3	SK509	CMGC	CDKL		Q8IVW4	1	15	15	312	312	1	314	522	209	529	592	64
MAPK5	SK214	CAMK	MAPKAPK	MAPKAPK	Q8IW41	1	15	15	44	44	1	198	200	3	241	250	10	462	473	12
TEX14	SK699	Other	NKF5		Q8IWB6	1	11	11	188	189	2	522	523	2	525	526	2	551	624	74	626	633	8	638	727	90	750	752	3	764	774	11	811	815	5	833	911	79	913	913	1	917	927	11	948	1115	168	1142	1224
BRSK2	SK015	CAMK	CAMKL	BRSK	Q8IWQ3	1	13	13	277	278	2	336	508	173	511	518	8	676	736	61
LMTK2	SK414	TK	Lmr		Q8IWU2	1	20	20	28	42	15	70	71	2	86	108	23	113	113	1	123	128	6	229	234	6	236	236	1	512	531	20	571	645	75	714	715	2	731	745	15	749	749	1	762	762	1	777	848
NIM1	SK449	CAMK	CAMKL	NIM1	Q8IY84	1	11	11	28	65	38	121	128	8	350	350	1	352	359	8	366	366	1	370	371	2	373	385	13	412	416	5	427	436	10
ULK2	SK388	Other	ULK	ULK	Q8IYT8	1	12	12	284	286	3	290	291	2	293	353	61	360	365	6	395	609	215	624	642	19	651	668	18	670	706	37	739	802	64	810	830	21	848	849	2	1029	1036	8
SCYL3	SK468	Other	SCY1		Q8IZE3	1	16	16	474	474	1	511	600	90	614	615	2	619	651	33	723	742	20
CDK20	SK483	CMGC	CDK	CCRK	Q8IZL9	1	3	3	9	9	1	323	329	7	337	346	10
PDK1L	SK452	Other	NKF4		Q8N165	1	14	14	86	87	2	124	125	2	259	261	3	302	303	2	312	312	1	328	341	14
STK40	SK492	CAMK	SgK495		Q8N2I9	1	33	33	76	85	10	125	131	7	354	365	12	423	435	13
MINK1	SK439	STE	STE20	MSN	Q8N4C8	1	18	18	294	294	1	298	951	654	999	1016	18	1094	1094	1	1332	1332	1
DCLK2	SK527	CAMK	DCAMKL		Q8N568	1	73	73	206	207	2	293	376	84	488	491	4	709	710	2	712	766	55
KKCC1	SK697	Other	CAMKK	Meta	Q8N5S9	1	13	13	25	98	74	172	191	20	325	331	7	417	417	1	419	419	1	428	438	11	458	505	48
KC1AL	SK541	CK1	CK1	CK1-A	Q8N752	1	12	12	154	156	3	200	203	4	303	337	35
MLKL	SK458	TKL	TKL-Unique		Q8NB16	1	18	18	131	170	40	193	193	1	195	197	3	323	323	1	356	358	3	361	371	11	455	455	1	458	471	14
CAMKV	SK062	CAMK	CAMK-Unique		Q8NCB2	1	16	16	57	69	13	220	220	1	323	501	179
SGK71	SK521	Other	SgK071		Q8NE28	1	30	30	34	35	2	427	431	5	444	455	12	590	590	1	654	680	27
HIPK4	SK582	CMGC	DYRK	HIPK	Q8NE63	1	11	11	413	413	1	488	616	129
ACVTC	SK405	TKL	STKR	Type1	Q8NER5	1	8	8	101	108	8	130	137	8	145	147	3	178	181	4	485	493	9
MYO3A	SK636	STE	STE20	NinaC	Q8NEV4	1	16	16	322	322	1	324	324	1	537	540	4	700	709	10	896	896	1	907	924	18	1010	1013	4	1065	1070	6	1130	1137	8	1139	1189	51	1194	1197	4	1210	1226	17	1234	1258	25	1281	1281
ANKK1	SK658	TKL	RIPK		Q8NFD2	1	12	12	323	324	2	327	343	17	749	765	17
NEK11	SK574	Other	NEK	NEK11	Q8NG66	1	14	14	334	468	135	478	479	2	485	526	42	551	555	5	566	575	10	577	578	2	598	600	3	634	645	12
ADCK3	SK609	Atypical	ABC1	ABC1-A	Q8NI60	1	6	6	86	121	36	124	155	32	157	158	2	160	168	9	170	208	39	636	647	12
KIS	SK661	Other	KIS		Q8TAS1	1	11	11	418	419	2
MK15	SK465	CMGC	MAPK	ERK7	Q8TD08	1	14	14	164	165	2	259	269	11	272	274	3	346	464	119	473	475	3	478	519	42	535	544	10
NEK9	SK470	Other	NEK	NEK8	Q8TD19	1	53	53	89	92	4	294	337	44	740	842	103	848	886	39	922	979	58
BRSK1	SK598	CAMK	CAMKL	BRSK	Q8TDC3	1	27	27	304	305	2	308	320	13	328	346	19	353	592	240	662	692	31	718	778	61
STK35	SK493	Other	NKF4		Q8TDR2	1	14	14	28	213	186	456	458	3	516	517	2	520	521	2	524	534	11
NEK7	SK421	Other	NEK	NEK6	Q8TDX7	1	25	25	293	302	10
TBCK	SK664	Other	TBCK		Q8TEA7	1	9	9	171	173	3	179	184	6	408	421	14	708	735	28	737	762	26	782	790	9	884	886	3	889	893	5
Haspin	SK692	Other	Haspin		Q8TF76	1	194	194	223	229	7	250	271	22	274	370	97	420	447	28	454	455	2	790	798	9
GPRK7	SK578	AGC	GRK	GRK	Q8WTQ7	1	17	17	137	144	8	229	231	3	394	394	1	434	434	1	436	439	4	441	450	10	537	553	17
ST32A	SK624	AGC	YANK		Q8WU08	1	16	16	228	230	3	323	345	23	365	396	32
MYO3B	SK583	STE	STE20	NinaC	Q8WXR4	1	18	18	315	315	1	320	335	16	549	552	4	621	628	8	630	631	2	1066	1074	9	1083	1089	7	1100	1203	104	1205	1206	2	1210	1216	7	1235	1296	62	1316	1341	26
TITIN	SK372	CAMK	MLCK		Q8WZ42	1	13	13	178	182	5	210	225	16	243	402	160	415	423	9	441	471	31	484	518	35	526	596	71	620	686	67	741	760	20	768	769	2	771	771	1	773	806	34	849	878	30	925	932
TRIB2	SK160	CAMK	Trbl		Q92519	1	53	53	209	209	1	334	343	10
DYRK2	SK115	CMGC	DYRK	DYRK2	Q92630	1	70	70	72	78	7	101	104	4	106	114	9	117	163	47	187	213	27	479	497	19	538	601	64
CDKL2	SK202	CMGC	CDKL		Q92772	1	15	15	39	43	5	300	339	40	344	345	2	366	374	9	376	376	1	385	412	28	415	422	8	475	493	19
M4K1	SK170	STE	STE20	KHS	Q92918	1	14	14	260	269	10	288	484	197	502	504	3	731	743	13	746	747	2	812	833	22
SGK3	SK525	AGC	SGK		Q96BR1	1	29	29	119	159	41	487	496	10
ULK4	SK457	Other	ULK	ULK	Q96C45	1	14	14	173	179	7	238	246	9	259	266	8	288	411	124	415	415	1	477	481	5	772	796	25	883	886	4	969	970	2	973	977	5	1132	1139	8	1154	1156	3	1213	1215	3	1234	1237
ADCK4	SK013	Atypical	ABC1	ABC1-A	Q96D53	1	16	16	49	100	52	110	138	29	526	544	19
AURKB	SK406	Other	Aur		Q96GD4	1	24	24	27	35	9	37	64	28	117	117	1	330	344	15
MASTL	SK455	AGC	MAST	MASTL	Q96GX5	1	30	30	197	197	1	199	199	1	289	310	22	316	317	2	320	333	14	541	631	91	653	734	82	870	870	1	875	879	5
Wnk4	SK588	Other	WNK		Q96J92	1	172	172	215	215	1	466	472	7	513	612	100	621	697	77	711	711	1	748	866	119	872	872	1	878	1149	272	1154	1155	2	1166	1243	78
TOPK	SK529	Other	TOPK		Q96KB5	1	19	19	240	245	6	248	266	19	308	308	1	313	314	2	316	322	7
NTKL	SK454	Other	SCY1		Q96KG9	1	22	22	540	569	30	582	808	227
MARK4	SK515	CAMK	CAMKL	MARK	Q96L34	1	50	50	372	635	264	743	752	10
ALPK3	SK765	Atypical	Alpha	Alpha-Unclassified	Q96L96	1	15	15	42	45	4	48	51	4	53	53	1	62	267	206	269	271	3	273	277	5	289	293	5	413	493	81	503	617	115	619	957	339	972	974	3	976	976	1	979	1152	174	1173	1200
KCC1G	SK021	CAMK	CAMK1		Q96NX5	1	17	17	328	363	36	397	407	11	425	434	10	436	439	4	444	444	1	467	476	10
TSSK2	SK474	CAMK	TSSK		Q96PF2	1	12	12	216	220	5	291	291	1	293	358	66
TSSK3	SK471	CAMK	TSSK		Q96PN8	1	10	10	12	12	1	260	260	1	265	268	4
NEK1	SK250	Other	NEK	NEK1	Q96PY6	1	11	11	42	50	9	282	306	25	308	308	1	326	412	87	415	420	6	457	465	9	509	510	2	512	633	122	642	758	117	864	977	114	1015	1015	1	1018	1022	5	1024	1024	1	1074	1183
LMTK3	SK415	TK	Lmr		Q96Q04	1	8	8	10	13	4	21	23	3	74	80	7	82	130	49	398	398	1	410	436	27	444	466	23	484	534	51	541	580	40	584	669	86	676	1349	674	1353	1460	108
SMG1	SK665	Atypical	PIKK	SMG1	Q96Q15	1	108	108	117	171	55	384	384	1	388	388	1	685	687	3	969	976	8	1063	1069	7	1156	1157	2	1161	1163	3	1165	1179	15	1277	1285	9	1287	1287	1	1681	1684	4	1693	1704	12	1895	1931
CDK15	SK462	CMGC	CDK	PFTAIRE	Q96Q40	1	19	19	25	25	1	29	36	8	48	85	38	426	430	5	432	435	4
ALPK1	SK755	Atypical	Alpha	Alpha-Unclassified	Q96QP1	1	20	20	28	41	14	395	404	10	507	507	1	521	545	25	547	596	50	598	743	146	750	801	52	824	863	40	869	870	2	882	897	16	903	968	66	1235	1244	10
KPSH2	SK602	CAMK	PSK		Q96QS6	1	42	42	44	52	9	331	385	55
TRPM7	SK423	Atypical	Alpha	ChaK	Q96QT4	1	12	12	192	194	3	529	533	5	541	613	73	779	787	9	789	815	27	822	838	17	1187	1197	11	1381	1394	14	1401	1411	11	1413	1434	22	1451	1452	2	1489	1514	26	1517	1518	2	1520	1541
PASK	SK499	CAMK	CAMKL	PASK	Q96RG2	1	71	71	81	83	3	87	92	6	113	114	2	181	188	8	207	207	1	314	332	19	428	436	9	486	568	83	572	587	16	591	597	7	753	754	2	759	759	1	761	790	30	792	794
CaMKK2	SK482	Other	CAMKK	Meta	Q96RR4	1	38	38	42	48	7	73	152	80	209	230	22	471	474	4	496	588	93
TRIB3	SK694	CAMK	Trbl		Q96RU7	1	69	69	345	358	14
TRIB1	SK014	CAMK	Trbl		Q96RU8	1	21	21	29	29	1	39	41	3	49	94	46	174	178	5	363	372	10
KS6C1	SK517	AGC	RSKL		Q96S38	1	12	12	157	166	10	169	234	66	238	242	5	279	294	16	303	324	22	368	374	7	443	535	93	559	622	64	631	666	36	683	688	6	788	795	8	853	876	24	1064	1066	3
PRPK	SK464	Other	Bud32		Q96S44	1	32	32	76	84	9	236	253	18
TESK2	SK532	TKL	LISK	TESK	Q96S53	1	34	34	316	357	42	359	383	25	386	387	2	471	487	17	517	571	55
SRPK1	SK358	CMGC	SRPK		Q96SB4	1	62	62	134	138	5	237	356	120	365	475	111	559	560	2	653	655	3
M3K14	SK253	STE	STE-Unique		Q99558	1	26	26	29	30	2	108	108	1	127	129	3	132	181	50	248	248	1	295	295	1	344	352	9	360	377	18	665	842	178	935	938	4	942	947	6
PIK3R4	SK262	Other	VPS15		Q99570	1	12	12	232	234	3	368	369	2	505	528	24	783	786	4	795	800	6	828	829	2	836	856	21	859	922	64	947	956	10	959	960	2	963	970	8	973	975	3	1027	1027	1	1075	1078
PMYT1	SK248	Other	WEE		Q99640	1	28	28	30	67	38	71	111	41	115	115	1	124	127	4	129	162	34	266	266	1	344	344	1	397	398	2	406	414	9	429	499	71
M3K5	SK225	STE	STE11	ASK	Q99683	1	14	14	35	52	18	54	55	2	60	104	45	944	948	5	951	965	15	971	984	14	1020	1020	1	1023	1025	3	1027	1039	13	1044	1063	20	1184	1240	57	1245	1256	12	1259	1265	7	1306	1311
M3K3	SK223	STE	STE11	MEKK2	Q99759	1	54	54	110	269	160	283	296	14	314	318	5	337	357	21	398	403	6	623	626	4
VRK1	SK389	CK1	VRK		Q99986	1	19	19	59	61	3	357	396	40
E2AK1	SK496	Other	PEK	HRI	Q9BQI3	1	48	48	78	78	1	260	264	5	266	333	68	337	372	36	476	476	1	481	487	7	568	571	4	613	630	18
RIOK1	SK615	Atypical	RIO	RIO1	Q9BRS2	1	111	111	130	155	26	409	411	3	413	417	5	419	419	1	490	568	79
MKNK1	SK235	CAMK	MAPKAPK	MNK	Q9BUB5	1	48	48	184	205	22	207	210	4	412	427	16	430	465	36
RIOK2	SK753	Atypical	RIO	RIO2	Q9BVS4	1	14	14	135	144	10	315	315	1	320	331	12	338	445	108	471	472	2	479	486	8	501	552	52
CDK11	SK443	CMGC	CDK	CDK8	Q9BWU1	1	13	13	28	31	4	114	123	10	352	502	151
TRPM6	SK746	Atypical	Alpha	ChaK	Q9BX84	1	14	14	73	78	6	192	198	7	544	563	20	572	579	8	581	603	23	651	656	6	786	791	6	793	798	6	806	807	2	814	820	7	1304	1331	28	1429	1444	16	1479	1519	41	1578	1591
TSSK6	SK524	CAMK	TSSK		Q9BXA6	1	12	12	31	37	7	264	273	10
TSSK1	SK705	CAMK	TSSK		Q9BXA7	1	9	9	216	221	6	284	367	84
PINK1	SK456	Other	NKF2		Q9BXM7	1	13	13	36	37	2	48	50	3	54	54	1	56	59	4	188	214	27	226	234	9	236	237	2	574	581	8
STK31	SK652	Other	Other-Unique		Q9BXU1	1	16	16	250	252	3	258	258	1	265	265	1	268	268	1	652	668	17	672	674	3	739	741	3	901	907	7	1002	1019	18
Wnk3	SK641	Other	WNK		Q9BYP7	1	30	30	35	93	59	115	121	7	123	138	16	149	149	1	189	189	1	482	545	64	551	615	65	630	678	49	680	681	2	692	693	2	698	743	46	829	922	94	975	981	7	1015	1028
STK33	SK463	CAMK	CAMK-Unique		Q9BYT3	1	21	21	29	33	5	37	39	3	42	87	46	95	97	3	395	395	1	397	421	25	426	514	89
KPCD2	SK480	CAMK	PKD		Q9BZL6	1	45	45	194	258	65	328	376	49	392	398	7	482	496	15	516	539	24	643	644	2	866	878	13
DCLK3	SK459	CAMK	DCAMKL		Q9C098	1	10	10	30	63	34	73	356	284	393	395	3	555	556	2	632	632	1	634	648	15
STRAB	SK434	STE	STE20	STLK	Q9C0K7	1	23	23	44	47	4	296	322	27	325	325	1	328	329	2	332	333	2	355	357	3	380	389	10	404	418	15
NuaK2	SK472	CAMK	CAMKL	NuaK	Q9H093	1	21	21	23	23	1	27	50	24	59	62	4	64	78	15	82	92	11	98	98	1	104	104	1	314	334	21	353	490	138	527	591	65	595	596	2	619	620	2	623	628	6
SIK2	SK513	CAMK	CAMKL	QIK	Q9H0K1	1	13	13	370	370	1	435	436	2	441	485	45	508	515	8	517	520	4	528	590	63	629	903	275	914	926	13
MYLK2	SK675	CAMK	MLCK		Q9H1R3	1	240	240	288	289	2	291	291	1	586	596	11
SLK	SK348	STE	STE20	SLK	Q9H2G2	1	21	21	309	487	179	491	491	1	493	578	86	584	586	3	588	680	93	688	1203	516	1206	1209	4	1212	1212	1	1220	1235	16
TAOK3	SK435	STE	STE20	TAO	Q9H2K8	1	11	11	313	429	117	435	501	67	506	506	1	524	533	10	535	600	66	608	611	4	621	748	128	771	873	103	885	898	14
HIPK2	SK495	CMGC	DYRK	HIPK	Q9H2X6	1	14	14	50	76	27	97	104	8	137	138	2	146	185	40	586	632	47	715	715	1	783	851	69	855	943	89	945	946	2	986	1103	118	1105	1107	3	1109	1112	4	1190	1192	3	1195	1198
SRMS	SK425	TK	Src	SRM	Q9H3Y6	1	9	9	11	11	1	13	40	28	479	488	10
HIPK3	SK314	CMGC	DYRK	HIPK	Q9H422	1	5	5	53	55	3	57	57	1	132	134	3	491	491	1	555	567	13	823	892	70	894	990	97	1005	1005	1	1011	1011	1	1026	1036	11	1048	1064	17	1098	1133	36	1146	1147	2	1152	1156
Wnk1	SK508	Other	WNK		Q9H4A3	1	81	81	90	90	1	92	216	125	221	228	8	555	555	1	560	816	257	818	818	1	820	820	1	824	859	36	864	866	3	868	934	67	954	966	13	1002	1130	129	1139	1142	4	1191	1192
PLK3	SK316	Other	PLK	PLK2	Q9H4B4	1	64	64	354	428	75	448	449	2	632	646	15
SG196	SK628	Other	Other-Unique		Q9H5K3	1	20	20	314	318	5	340	350	11
PEAK1	SK649	Other	NKF3		Q9H792	1	12	12	24	69	46	114	150	37	171	171	1	230	270	41	326	415	90	417	417	1	419	421	3	424	424	1	427	427	1	431	444	14	484	541	58	548	548	1	550	550	1	553	595
CLK4	SK484	CMGC	CLK		Q9HAZ1	1	69	69	91	148	58	297	297	1	328	330	3	379	384	6	472	481	10
MKNK2	SK236	CAMK	MAPKAPK	MNK	Q9HBH9	1	18	18	28	81	54	410	426	17	432	465	34
SGK2	SK523	AGC	SGK		Q9HBY8	1	38	38	57	92	36	415	416	2	418	427	10
NEK6	SK420	Other	NEK	NEK6	Q9HC98	1	32	32	309	313	5
CK1g1	SK647	CK1	CK1	CK1-G	Q9HCP0	1	41	41	228	232	5	351	393	43	402	407	6	411	422	12
PAK6	SK429	STE	STE20	PAKB	Q9NQU5	1	24	24	26	26	1	53	53	1	90	92	3	98	112	15	120	142	23	147	175	29	177	180	4	183	361	179	620	621	2	643	648	6	672	681	10
DYRK4	SK116	CMGC	DYRK	DYRK2	Q9NR20	1	33	33	157	161	5	345	360	16	406	491	86	501	520	20
SNRK	SK625	CAMK	CAMKL	SNRK	Q9NRH2	1	11	11	215	218	4	293	293	1	340	346	7	366	369	4	371	645	275	756	765	10
LATS2	SK442	AGC	NDR		Q9NRM7	1	71	71	186	203	18	220	234	15	266	323	58	327	328	2	335	357	23	375	375	1	398	435	38	445	504	60	508	513	6	530	600	71	647	647	1	654	665	12	820	825	6	997	1031
STK36	SK199	Other	ULK	Fused	Q9NRP7	1	12	12	296	296	1	300	353	54	358	430	73	513	520	8	645	659	15	895	926	32	1279	1279	1	1284	1315	32
NRBP2	SK520	Other	NRBP		Q9NSY0	1	55	55	139	145	7	403	406	4	411	411	1	414	421	8	498	501	4
BMP2K	SK704	Other	NAK	BIKE	Q9NSY1	1	42	42	53	57	5	327	391	65	396	596	201	613	616	4	624	837	214	868	889	22	947	947	1	949	950	2	957	957	1	959	1060	102	1078	1085	8	1087	1089	3	1091	1091	1	1107	1107
IRAK4	SK257	TKL	IRAK		Q9NWZ3	1	10	10	131	167	37	423	426	4	446	447	2	449	460	12
ST32B	SK481	AGC	YANK		Q9NY57	1	16	16	181	183	3	270	270	1	323	346	24	369	414	46
MLTK	SK504	TKL	MLK	ZAK	Q9NYL2	1	11	11	99	100	2	294	314	21	317	318	2	325	325	1	424	427	4	558	566	9	577	596	20	620	620	1	622	622	1	624	800	177
CDK12	SK485	CMGC	CDK	CRK7	Q9NYV4	1	63	63	79	721	643	1033	1111	79	1127	1363	237	1376	1376	1	1379	1393	15	1395	1395	1	1443	1490	48
PLK2	SK353	Other	PLK	PLK2	Q9NYY3	1	75	75	77	78	2	124	128	5	401	442	42	461	463	3	678	685	8
E2AK3	SK281	Other	PEK	PEK	Q9NZJ5	1	8	8	30	36	7	50	105	56	107	107	1	286	289	4	291	301	11	362	375	14	403	408	6	538	542	5	544	558	15	575	581	7	684	705	22	715	757	43	761	767	7	769	822
MARK1	SK215	CAMK	CAMKL	MARK	Q9P0L2	1	54	54	319	320	2	377	503	127	510	727	218	786	795	10
PIM2	SK292	CAMK	PIM		Q9P1W9	1	34	34	294	311	18
PAK7	SK510	STE	STE20	PAKB	Q9P286	1	21	21	94	146	53	205	215	11	217	217	1	219	313	95	338	431	94	716	719	4
MST4	SK431	STE	STE20	YSK	Q9P289	1	15	15	291	336	46	365	380	16	404	416	13
E2AK4	SK490	Other	PEK	GCN2	Q9P2K8	1	32	32	136	225	90	228	262	35	389	390	2	547	560	14	661	793	133	879	898	20	917	918	2	1472	1473	2	1486	1502	17	1647	1647	1	1649	1649	1
NLK	SK255	CMGC	MAPK	nmo	Q9UBE8	1	141	141	292	293	2	513	527	15
KS6B2	SK266	AGC	RSK	p70	Q9UBS0	1	39	39	53	54	2	92	93	2	111	113	3	116	120	5	268	272	5	311	311	1	353	356	4	363	380	18	402	404	3	406	409	4	412	414	3	417	418	2	425	482	58
ST17A	SK486	CAMK	DAPK	DRAK	Q9UEE5	1	47	47	82	85	4	91	101	11	339	366	28	384	385	2	389	389	1	405	414	10
STK39	SK432	STE	STE20	FRAY	Q9UEW8	1	51	51	341	343	3	364	365	2	370	449	80	541	545	5
EphA6	SK646	TK	Eph		Q9UF33	1	8	8	535	543	9	570	589	20	729	740	12	1026	1035	10
TBK1	SK531	Other	IKK		Q9UHD2	1	11	11	15	16	2	720	729	10
NRBP	SK479	Other	NRBP		Q9UHY1	1	79	79	160	175	16	412	445	34	524	535	12
DAPK2	SK104	CAMK	DAPK	DAPK	Q9UIK4	1	16	16	44	45	2	57	75	19	118	122	5	347	347	1	349	370	22
KS6A6	SK518	AGC	RSK	RSK	Q9UK32	1	50	50	370	370	1	374	376	3	460	465	6	623	628	6	730	745	16
TNIK	SK438	STE	STE20	MSN	Q9UKE5	1	19	19	275	282	8	288	1014	727	1029	1043	15	1354	1360	7
TLK1	SK373	Other	TLK		Q9UKI8	1	196	196	198	198	1	201	203	3	231	232	2	249	263	15	267	269	3	273	298	26	303	303	1	305	306	2	335	387	53	421	423	3	437	450	14	741	766	26
TAOK2	SK362	STE	STE20	TAO	Q9UL54	1	14	14	319	855	537	859	862	4	869	869	1	877	882	6	885	885	1	887	967	81	1076	1076	1	1119	1120	2	1126	1155	30	1189	1235	47
ALK	SK024	TK	ALK		Q9UM73	1	19	19	21	44	24	76	82	7	107	118	12	125	147	23	222	238	17	295	317	23	328	328	1	528	529	2	655	655	1	659	667	9	694	696	3	740	754	15	870	881	12	900	901
SRPK3	SK507	CMGC	SRPK		Q9UPE1	1	60	60	134	136	3	252	385	134	471	471	1	565	567	3
ICK	SK497	CMGC	RCK		Q9UPZ9	1	15	15	295	299	5	311	370	60	377	377	1	379	486	108	512	555	44	578	578	1	587	632	46
MOK	SK505	CMGC	RCK		Q9UQ07	1	14	14	293	310	18	313	384	72	386	419	34
CD11A	SK297	CMGC	CDK	PITSLRE	Q9UQ88	1	402	402	728	750	23	752	758	7	763	783	21
AURKC	SK043	Other	Aur		Q9UQB9	1	35	35	79	79	1	81	83	3	132	134	3	300	309	10
KCC2A	SK057	CAMK	CAMK2		Q9UQM7	1	10	10	53	56	4	308	308	1	312	352	41	446	448	3	469	478	10
AKT3	SK020	AGC	Akt		Q9Y243	1	11	11	109	145	37	446	479	34
ST38L	SK500	AGC	NDR		Q9Y2H1	1	19	19	51	51	1	53	88	36	126	126	1	260	260	1	262	275	14	458	464	7
MAST1	SK345	AGC	MAST	MAST	Q9Y2H9	1	121	121	136	186	51	189	195	7	343	371	29	381	391	11	680	704	25	706	706	1	710	969	260	980	988	9	1061	1570	510
SIK3	SK501	CAMK	CAMKL	QIK	Q9Y2K2	1	11	11	106	106	1	378	400	23	454	455	2	457	560	104	602	812	211	822	822	1	825	911	87	917	1000	84	1002	1085	84	1088	1088	1	1122	1141	20	1144	1150	7	1152	1153	2	1159	1159
M3K2	SK222	STE	STE11	MEKK2	Q9Y2U5	1	61	61	155	251	97	277	353	77	392	396	5	616	619	4
Wnk2	SK016	Other	WNK		Q9Y3S1	1	193	193	551	886	336	911	1194	284	1246	1300	55	1325	1345	21	1352	1352	1	1357	1357	1	1364	1592	229	1600	1622	23	1624	1785	162	1794	1794	1	1800	1802	3	1815	1873	59	1876	1898	23	1909	1910
DYRK1B	SK114	CMGC	DYRK	DYRK1	Q9Y463	1	20	20	57	59	3	68	84	17	88	93	6	96	96	1	311	313	3	315	316	2	359	399	41	434	629	196
TRRAP	SK380	Atypical	PIKK	TRRAP	Q9Y4A5	1	10	10	48	49	2	51	52	2	204	217	14	424	425	2	432	443	12	486	487	2	489	511	23	533	543	11	1071	1072	2	1081	1086	6	1398	1399	2	1492	1494	3	1623	1623	1	1627	1633
M4K5	SK191	STE	STE20	KHS	Q9Y4K4	1	14	14	295	296	2	321	359	39	372	491	120	792	794	3	827	829	3	837	846	10
RIPK3	SK330	TKL	RIPK		Q9Y572	1	17	17	166	182	17	242	242	1	244	249	6	252	253	2	255	255	1	275	278	4	308	349	42	354	354	1	356	446	91	478	518	41
MRCKb	SK241	AGC	DMPK	GEK	Q9Y5S2	1	12	12	409	409	1	411	415	5	418	418	1	423	654	232	656	657	2	664	666	3	668	672	5	676	676	1	736	771	36	774	777	4	853	936	84	964	1026	63	1028	1028	1	1104	1108
IRAK3	SK181	TKL	IRAK		Q9Y616	1	11	11	476	509	34	511	534	24	547	569	23	579	596	18
STK24	SK246	STE	STE20	YSK	Q9Y6E0	1	18	18	304	371	68	432	443	12
KC1G3	SK087	CK1	CK1	CK1-G	Q9Y6M4	1	43	43	226	230	5	342	447	106
M3K4	SK224	STE	STE11	MEKK4	Q9Y6R4	1	160	160	227	256	30	432	502	71	784	784	1	810	814	5	1019	1022	4	1156	1294	139	1298	1299	2	1309	1309	1	1599	1608	10
RPKL1	SK473	AGC	RSKL		Q9Y6S9	1	19	19	232	350	119	483	487	5	546	549	4
Table Legends
Name	Name of the Protein
SK	Internal accession number
Group	Kinase Group
Family	Kinase Family
Subfamily	Kinase SubFamily
Uniprot ID	Uniprot ID of the Kinase
Start	Start of the IDR
End	End of the IDR
[truncated: 52 more columns]

## Sheet: Table S2
Supplementary Table S2: Disease Enrichment of the 10 kinase Groups reveal Cancer has the most enriched disease
© 2000-2013 Ingenuity Systems, Inc. All rights reserved.
Category	Group Name	p-value	Molecules
Connective Tissue Disorders	TKL	1.56E-06-7.9E-03	TGFBR2,RAF1,RIPK1,TGFBR1,BMPR1A,ACVRL1,ACVR2B,RIPK2,ACVR1B,ACVR2A
Connective Tissue Disorders	TK	4.04E-07-4.04E-07	MET,KIT,ERBB2,RYK,EGFR
Connective Tissue Disorders	STE	1.21E-03-2.64E-02	MAP3K14,MAP4K1,MAP2K1,MAP3K3,MAP2K5
Connective Tissue Disorders	RGC	3.22E-04-6.11E-03	NPR2
Connective Tissue Disorders	Other	4.37E-03-3.55E-02	IKBKB,TBK1,IKBKE,EIF2AK2,EIF2AK3
Connective Tissue Disorders	CMK	3.19E-02-3.19E-02	STK11,CHEK2
Connective Tissue Disorders	CMGC	1.47E-05-3.87E-03	MAPK8,MAPK9,GSK3B,HIPK2,HIPK1,DYRK1A
Connective Tissue Disorders	Atypical	7.07E-03-4.31E-02	TRPM6,MTOR,BCR,ATM
Connective Tissue Disorders	AGCgroup	3.66E-04-3.67E-03	AKT2,PRKACA,RPS6KA3,PRKCB,PRKCA
Developmental Disorder	TKL	1.56E-06-7.9E-03	RIPK4,RAF1,TGFBR1,ILK,ACVRL1,ACVR2B,ACVR1B,LIMK1,TGFBR2,BRAF,BMPR1B,ARAF,BMPR1A,MAP3K7,ACVR2A
Developmental Disorder	TK	1.47E-10-8.78E-07	FYN,EPHB2,ABL1,PTK2,FGFR3,ROR2,LCK,DDR2,PDGFRA,HCK,IGF1R,ERBB2,RET,EGFR,SRC,FES,FGFR1,FGFR2,ERBB3,MET,LYN,EPHB3,INSR,JAK3,RYK
Developmental Disorder	STE	5.77E-08-2.06E-02	MAP2K4,MAP2K6,MAP2K7,STK25,MAP3K1,MAP4K4,MAP3K5,MAP3K4,STK3,STK4,PAK1,MAP2K2,MAP2K3,MAP2K1,MAP2K5
Developmental Disorder	RGC	1.77E-05-8.99E-03	GUCY2C,NPR1,NPR2
Developmental Disorder	Other	4.51E-03-1.35E-02	EIF2AK1,BUB1B,EIF2AK3
Developmental Disorder	CMK	4.51E-03-4.97E-02	TRIB1,PIM3,SPEG,CAMK2D,CAMK4,PIM1,STK11,MARK2,PRKAA1,MYLK3,CASK,TTN,PIM2
Developmental Disorder	CMGC	1.47E-05-8.97E-03	MAPK1,MAPK3,CDK16,CDK6,MAPK8,MAPK9,MAPK14,CDK4,CSNK2A1,MAPK7,GSK3B,HIPK1,HIPK2,CDK2,DYRK1A
Developmental Disorder	Atypical	1.42E-03-3.9E-02	PRKDC,TRPM6,MTOR,BCR,ATR,ATM
Developmental Disorder	AGCgroup	7.5E-08-3.67E-03	AKT2,ADRBK1,RPS6KA3,PDPK1,PRKG2,ROCK2,PRKCI,AKT1,PRKG1,PRKCD,PRKCE,PRKCH,RPS6KA5,RPS6KA4,LATS1,PRKCA,PRKCB
Skeletal and Muscular Disorders	TKL	1.56E-06-7.9E-03	TGFBR2,RAF1,BMPR1B,TGFBR1,BMPR1A,ACVR1,BMPR2,LRRK2,ACVRL1,ACVR2B,RIPK2,ACVR1B,ACVR2A
Skeletal and Muscular Disorders	STE	5.77E-08-2.64E-02	MAP2K6,MAP2K4,MAP3K14,MAP2K7,STK25,MAP4K4,STK24,MAP4K1,MAP2K3,MAP3K5,MAP3K3,MAP2K1,MAP2K5
Skeletal and Muscular Disorders	RGC	3.22E-04-8.99E-03	NPR1,NPR2
Skeletal and Muscular Disorders	Other	4.05E-07-2.23E-02	IKBKB,PLK4,PLK3,PLK2,TTK,AURKB,EIF2AK3,PBK,PINK1
Skeletal and Muscular Disorders	CMK	4.51E-03-4.97E-02	PIM3,SPEG,CAMK2D,STK11,PRKAA1,MELK,CASK,TTN,CHEK2,CHEK1
Skeletal and Muscular Disorders	CMGC	1.47E-05-7.72E-03	MAPK14,MAPK1,MAPK8,MAPK9,GSK3B,MAPK7,HIPK2,HIPK1,DYRK1A
Skeletal and Muscular Disorders	CK1	2.38E-02-2.38E-02	VRK1
Skeletal and Muscular Disorders	Atypical	1.42E-03-4.71E-02	TRPM6,MTOR,TRPM7,BCR
Skeletal and Muscular Disorders	AGCgroup	5.45E-05-4.38E-03	AKT2,ADRBK1,SGK1,RPS6KA3,PDPK1,GRK1,PRKCG,ROCK2,PRKX,AKT1,PRKG1,PRKCD,PRKACA,PRKCE,RPS6KA5,MAST3,PRKCA,PRKCB
Cardiovascular Disease	TKL	2.03E-06-7.9E-03	RAF1,TGFBR1,ILK,BMPR2,ACVRL1,ACVR2B,LIMK1,TGFBR2,BRAF,BMPR1B,BMPR1A,IRAK4,ACVR2A
Cardiovascular Disease	TK	1.24E-07-1.52E-06	MERTK,SYK,FLT1,TYRO3,KDR,FLT4,PDGFRA,JAK2,AXL,TEK,PDGFRB
Cardiovascular Disease	STE	5.77E-08-2.64E-02	MAP2K6,MAP2K4,STK4,MAP2K7,STK39,MYO3B,OXSR1,MAP3K1,MAP2K3,MAP3K5,MAP2K1,MAP2K5
Cardiovascular Disease	RGC	1.74E-06-8.99E-03	GUCY2C,NPR1,NPR2
Cardiovascular Disease	Other	1.79E-02-1.79E-02	IKBKE
Cardiovascular Disease	CMK	7.7E-04-4.85E-02	MYLK,TRIB1,PIM3,CAMK2D,PIM1,MYLK2,MARK1,PRKAA2,MAPKAPK2,TTN,PRKD1
Cardiovascular Disease	CMGC	8.98E-05-1.02E-02	MAPK14,CDK5,MAPK1,CDK4,MAPK3,CSNK2A1,MAPK8,MAPK9,GSK3A,GSK3B,MAPK7,MAPK11,CDK2,DYRK1A
Cardiovascular Disease	Atypical	1.42E-03-4.17E-02	RIOK1,MTOR,BCR,ATM
Cardiovascular Disease	AGCgroup	1.91E-04-3.67E-03	ROCK2,AKT2,PRKCQ,AKT1,PRKG1,ADRBK1,PRKCD,PDPK1,PRKCE,PRKCH,GRK5,PRKCG,PRKCA,PRKCB
Respiratory Disease	TKL	2.03E-06-7.9E-03	TGFBR2,BMPR1B,BMPR1A,ACVRL1,BMPR2,ACVR2B,IRAK3,ACVR2A
Respiratory Disease	TK	2.56E-22-7.26E-07	JAK2,FGFR3,LCK,NTRK1,IGF1R,PDGFRA,KIT,LTK,ERBB2,RET,TNK1,TEK,EGFR,PDGFRB,SRC,EPHB4,FLT1,FGFR1,FLT4,FGFR2,ERBB3,AXL,CSF1R,MET,KDR,PTK6,INSR,MST1R,ALK
Respiratory Disease	RGC	3.85E-05-7.6E-04	NPR1,NPR2
Respiratory Disease	Other	3.47E-04-2.23E-02	BUB1,EIF2AK1,IKBKB,STK36,PLK3,NEK6,PLK1,AURKA,BUB1B,STK35,AURKB,WNK1,PINK1
Respiratory Disease	Atypical	8.47E-03-4.44E-02	MTOR,BCR,PDK4
Hereditary Disorder	TKL	6.81E-06-7.9E-03	BRAF,TGFBR2,RAF1,BMPR1B,TGFBR1,BMPR1A,ACVR1,LRRK2,ACVR2B,IRAK4,AMHR2,ACVR2A,LIMK1
Hereditary Disorder	STE	2.96E-03-2.06E-02	STK25,STRADA,MAP3K1,MAP4K4,MAP3K5
Hereditary Disorder	RGC	3.22E-04-5.46E-03	GUCY2D,NPR2
Hereditary Disorder	Other	6E-05-1.35E-02	EIF2AK1,NEK8,AURKC,WNK4,WNK1,BUB1B,EIF2AK3,PINK1
Hereditary Disorder	CMK	4.51E-03-9E-03	MYLK,STK11,TTN,CHEK2
Hereditary Disorder	CMGC	3.87E-03-3.87E-03	CDKL5,GSK3B,MAK,DYRK1A
Hereditary Disorder	CK1	7.09E-04-7.09E-04	TTBK2
Hereditary Disorder	Atypical	1.42E-03-3.9E-02	TRPM6,PRKDC,MTOR,TAF1,TRPM7,ADCK3,ATR,ATM
Hereditary Disorder	AGCgroup	1.41E-03-3.67E-03	ROCK2,PRKX,AKT1,SGK1,RPS6KA3,RPS6KA5,GRK1,MAST3,LATS1,PRKCB,PRKCG
Cancer	TKL	1.36E-05-7.9E-03	RIPK4,RAF1,TNNI3K,MAP3K11,TGFBR1,ILK,BMPR2,LIMK2,ACVR2B,KIAA1804,ACVR1B,IRAK1,KSR1,LIMK1,TGFBR2,BRAF,BMPR1B,RIPK1,ARAF,BMPR1A,ZAK,ACVR1C,AMHR2,ACVR2A,IRAK2
Cancer	TK	1.83E-31-1.57E-06	JAK1,EPHB2,FLT3,TYRO3,PTK2,FGFR3,EPHB1,LCK,MERTK,FGFR4,ROS1,RET,FGR,TEK,MATK,ITK,PDGFRB,FES,EPHA1,FGFR1,TYK2,FGFR2,BMX,TNK2,ROR1,DDR1,TIE1,MET,SYK,ZAP70,AATK,INSR,EPHA2,ALK,LMTK2,FYN,PTK2B,ABL1,EPHA4,JAK2,SRMS,STYK1,EPHB6,YES1,DDR2,ERBB4,NTRK1,IGF1R,PDGFRA,HCK,KIT,LTK,ERBB2,TNK1,EGFR,SRC,EPHB4,CSK,FLT1,FLT4,ERBB3,EPHA3,AXL,FRK,CSF1R,BTK,NTRK2,ABL2,NTRK3,FER,KDR,LYN,PTK6,EPHB3,MST1R,JAK3,RYK
Cancer	STE	5.7E-08-2.64E-02	MAP2K6,MAP2K4,NRK,MAP4K4,MAP3K5,MAP3K4,TAOK1,STK4,PAK1,MAP2K2,MAP4K1,STK24,TAOK2,MAP2K1,MAP3K14,MAP2K7,PAK4,PAK2,MAP3K6,STK25,MAP3K1,STK3,MYO3A,MST4,MINK1,PAK7,MAP3K8,MAP2K3,MAP4K5,TNIK,MAP2K5
Cancer	RGC	3.31E-02-3.31E-02	NPR1
Cancer	Other	4.05E-07-3.77E-02	PLK3,CDC7,STK35,AURKB,TTK,PBK,RNASEL,IKBKB,PLK4,NEK2,NEK3,PLK2,MOS,NEK6,NEK7,CHUK,C9orf96,SCYL3,EIF2AK1,BMP2K,PEAK1,SGK223,WEE1,WNK2,IKBKE,PLK1,TBK1,TP53RK,AURKA,BUB1B,NRBP1,BUB1,ULK3,ERN2,NEK4,PKMYT1,TLK1,STK31,EIF2AK2,WNK1,NEK9,EIF2AK3,CAMKK2,PINK1
Cancer	CMK	2.03E-03-4.49E-02	DAPK1,KALRN,STK11,OBSCN,TRIB3,MELK,DCLK1,NUAK2,TSSK6,CHEK1,BRSK2,TRIB1,TRIO,STK17A,PIM1,MKNK1,PRKAA2,PRKAA1,NUAK1,PRKD2,STK17B,PRKD1,CHEK2,PIM2
Cancer	CMGC	5.24E-06-1.06E-02	DYRK2,CDK12,SRPK1,MAPK1,MOK,MAPK3,MAPK13,SRPK2,CLK1,CDK5,GSK3B,HIPK2,HIPK1,CDK13,CDK7,CDK3,CDK6,MAPK8,MAPK9,CDK14,MAPK12,CDK1,CSNK2A2,CLK4,MAPK14,CDK4,CLK2,MAPK10,MAPK7,MAK,CDK2,CDKL3
Cancer	CK1	4.24E-03-3.49E-02	CSNK1E,VRK1,VRK2,CSNK1A1,TTBK1
Cancer	Atypical	1.39E-04-4.44E-02	PRKDC,MTOR,TAF1,ADCK2,BCR,SMG1,TRRAP,ATM,PDK4
Cancer	AGCgroup	3E-17-4.38E-03	PRKACB,RPS6KB1,AKT2,PRKCQ,SGK1,RPS6KA3,PDPK1,PRKG2,SGK2,PRKCZ,PRKCG,ROCK1,ROCK2,MAST1,CDC42BPA,PRKCI,AKT1,PRKCD,CIT,PRKACA,AKT3,PRKCE,PRKCH,RPS6KA1,LATS1,RPS6KC1,PRKCA,PRKCB
Dermatological Diseases and Conditions	TKL	4.07E-05-7.9E-03	TGFBR2,BRAF,RAF1,TGFBR1,ACVRL1
Dermatological Diseases and Conditions	TK	1.12E-08-7.26E-07	SRC,FYN,FES,FLT1,FGFR1,TYRO3,FLT4,FGFR2,EPHA3,AXL,FGFR3,MET,LCK,YES1,MERTK,NTRK3,NTRK1,KDR,ZAP70,HCK,KIT,INSR,JAK3,RET
Dermatological Diseases and Conditions	STE	1.21E-03-1.47E-02	MAP2K4,MAP3K14,MAP2K3,MAP4K1,MAP2K1,MAP3K3,MAP2K5
Dermatological Diseases and Conditions	Other	9E-03-2.06E-02	NEK6,PLK1,NEK7,TBK1,EIF2AK2,CHUK,AURKB,WNK1
Dermatological Diseases and Conditions	CMK	9E-03-9E-03	STK11
Dermatological Diseases and Conditions	CMGC	3.05E-04-1.02E-02	CDK12,CLK4,CDK4,CLK2,MAPK8,CDK6,MAPK9,MAPK13,GSK3B,HIPK2,HIPK1,CDK2
Dermatological Diseases and Conditions	Atypical	1.42E-03-4.71E-02	MTOR,ADCK2,BCR,TRRAP,PDK4,ATM
Dermatological Diseases and Conditions	AGCgroup	3E-17-4.38E-03	AKT1,PRKCQ,PRKCI,PRKCD,PRKCE,RPS6KA5,RPS6KA4,PRKCH,PRKCZ,PRKCB,PRKCG,PRKCA
Infectious Disease	TKL	1.37E-04-3.98E-03	RAF1,MAP3K9,TGFBR1,MAP3K11,LIMK2,IRAK3,IRAK1,KSR2,LIMK1,TGFBR2,MAP3K12,ARAF,MAP3K7,RIPK2,IRAK4,ACVR2A,IRAK2
Infectious Disease	STE	3.12E-08-2.57E-02	MAP3K14,MAP2K7,PAK2,STK39,MAP4K4,MAP3K5,TAOK1,MINK1,PAK1,STRADB,MAP2K2,PAK3,OXSR1,MAP3K8,MAP2K3,MAP2K1,MAP2K5
Infectious Disease	Other	2.22E-08-3.55E-02	ULK1,PLK3,ERN1,GAK,PIK3R4,PBK,RNASEL,IKBKB,PLK4,MOS,CHUK,C9orf96,BMP2K,IKBKE,TBK1,PLK1,NRBP1,EIF2AK4,NEK8,ERN2,PKMYT1,EIF2AK2,WNK1,NEK9,EIF2AK3,CAMKK2
Infectious Disease	CMK	3.53E-03-3.99E-02	DCLK2,DAPK2,MARK2,MKNK1,DCLK1,TSSK6,CAMK2B
Infectious Disease	CMGC	3.69E-04-1.61E-03	SRPK2,CLK1,SRPK1,MAPK1,HIPK3,CDK4,GSK3B,HIPK1,DYRK1A
Infectious Disease	Atypical	1.42E-03-7.43E-03	MTOR,ATR,ATM
Infectious Disease	AGCgroup	2.38E-08-3.67E-03	AKT2,ADRBK1,DMPK,SGK1,RPS6KA3,GRK5,PKN2,ROCK1,PRKX,CDC42BPB,CDC42BPA,AKT1,PRKCI,PRKCD,CIT,PRKACA,GRK6,PRKCH,RPS6KA4,RPS6KA5,PRKCB,PRKCA
Endocrine System Disorders	TKL	1.89E-04-5.28E-03	TGFBR2,BRAF,TGFBR1
Endocrine System Disorders	TK	8.05E-17-1.18E-06	EPHB2,PTK2,EPHB6,FGFR3,LCK,YES1,FGFR4,NTRK1,PDGFRA,IGF1R,KIT,LTK,ERBB2,RET,TNK1,TEK,EGFR,PDGFRB,SRC,EPHB4,FLT1,FGFR1,FLT4,FGFR2,ERBB3,AXL,CSF1R,DDR1,MET,NTRK2,KDR,PTK6,EPHA2
Endocrine System Disorders	STE	2.06E-02-2.06E-02	STK39
Endocrine System Disorders	Other	4.51E-03-3.55E-02	IKBKB,NEK2,NEK4,AURKC,EIF2AK3
Endocrine System Disorders	CMK	3.89E-02-3.89E-02	STK11,DCLK1,PRKD1,BRSK2
Endocrine System Disorders	CMGC	1.49E-03-7.72E-03	CDK4,CDK2
Endocrine System Disorders	CK1	1.9E-02-1.9E-02	VRK2
Endocrine System Disorders	Atypical	1.42E-03-3.76E-02	TRPM6,MTOR,BCR,PDK4
Endocrine System Disorders	AGCgroup	2.02E-06-4.34E-04	RPS6KB1,AKT2,RPS6KA3,PDPK1,ROCK1,AKT1,PRKCI,PRKCD,STK32C,PRKCE,AKT3,RPS6KA1,PRKCA,PRKCB
Gastrointestinal Disease	TKL	1.89E-04-7.9E-03	RIPK4,BRAF,TGFBR2,TGFBR1,MAP3K7,BMPR1A,BMPR2,ACVR2B,ACVR2A
Gastrointestinal Disease	TK	1.06E-15-8.78E-07	JAK1,EPHB2,FLT3,ABL1,EPHA4,FGFR3,PTK2,YES1,FGFR4,PDGFRA,IGF1R,KIT,ERBB2,RET,TNK1,EGFR,PDGFRB,SRC,EPHB4,FGFR1,FLT1,FLT4,FGFR2,ERBB3,TNK2,AXL,CSF1R,MET,FER,KDR,EPHB3,MST1R,AATK,INSR,JAK3,EPHA2,RYK
Gastrointestinal Disease	STE	5.92E-03-1.77E-02	MAP3K14,MAP3K5
Gastrointestinal Disease	RGC	3.22E-04-2.04E-02	GUCY2C,NPR2
Gastrointestinal Disease	Other	6.65E-05-3.55E-02	EIF2AK1,PEAK1,CDC7,WNK2,TBK1,PLK1,AURKA,TP53RK,STK35,TTK,BUB1B,PBK,IKBKB,PLK4,NEK2,NEK6,ERN2,TLK1,NEK7,STK31,EIF2AK2,CHUK,WNK1,EIF2AK3
Gastrointestinal Disease	CMK	4.51E-03-3.89E-02	STK11,DCLK1,PRKD1,BRSK2
Gastrointestinal Disease	CMGC	8.77E-05-7.72E-03	CDK4,CDK6,MAPK8,MAPK9,CDK2
Gastrointestinal Disease	CK1	1.54E-02-3.21E-02	VRK1,VRK2,CSNK1A1,TTBK1
Gastrointestinal Disease	Atypical	1.11E-03-4.31E-02	TRPM6,PRKDC,MTOR,BCR,ALPK2,PDK4
Gastrointestinal Disease	AGCgroup	3.96E-05-3.67E-03	AKT2,PRKCI,PRKCD,PRKCE,PRKCB,PRKCA
Organismal Injury and Abnormalities	TKL	1.89E-04-7.9E-03	TGFBR2,BRAF,RAF1,RIPK1,TGFBR1,BMPR1A,BMPR2,ACVRL1,IRAK4,IRAK2,IRAK1
Organismal Injury and Abnormalities	TK	4.98E-09-7.49E-07	FYN,JAK1,TYRO3,ABL1,JAK2,PTK2,ROR2,MERTK,NTRK1,HCK,IGF1R,PDGFRA,KIT,TEK,EGFR,PDGFRB,FES,FLT1,FGFR1,FLT4,FGFR2,EPHA3,AXL,ROR1,CSF1R,TIE1,ABL2,NTRK3,SYK,KDR,INSR
Organismal Injury and Abnormalities	STE	8.59E-06-2.64E-02	MAP2K6,MAP3K14,STK4,MAP2K7,PAK1,MAP2K3,MAP3K8,MAP3K5,MAP2K1,MAP2K5
Organismal Injury and Abnormalities	RGC	3.85E-05-1.28E-02	NPR1,NPR2
Organismal Injury and Abnormalities	Other	1.2E-04-3.55E-02	IKBKB,ERN1,TBK1,CHUK,EIF2AK3
Organismal Injury and Abnormalities	CMK	7.7E-04-4.85E-02	MYLK,PIM3,CAMK2A,PIM1,STK11,PRKAA1,PRKAA2,MAPKAPK2,CAMK2G
Organismal Injury and Abnormalities	CMGC	1.47E-05-1.02E-02	MAPK14,MAPK1,CDK4,MAPK8,MAPK9,GSK3A,GSK3B,HIPK2,HIPK1,MAPK11,CDK2
Organismal Injury and Abnormalities	Atypical	1.11E-03-1.94E-02	PRKDC,MTOR,BCR,ATM,PDK4
Organismal Injury and Abnormalities	AGCgroup	2.53E-04-4.38E-03	RPS6KB1,AKT2,ADRBK1,SGK1,RPS6KA3,PRKCG,ROCK2,PRKG1,AKT1,PRKCI,RPS6KB2,PRKCE,RPS6KA4,RPS6KA5,PRKCB
Hematological Disease	TKL	3.02E-04-5.28E-03	BMPR1A,ACVR1,BMPR2,IRAK4,IRAK2,IRAK1
Hematological Disease	TK	1E-19-1.57E-06	FYN,JAK1,PTK2B,TYRO3,FLT3,ABL1,JAK2,FGFR3,LCK,YES1,MERTK,PDGFRA,HCK,KIT,TNK1,FGR,PDGFRB,EGFR,SRC,FGFR1,TYK2,FGFR2,AXL,ROR1,CSF1R,BTK,ABL2,NTRK3,SYK,KDR,ZAP70,LYN,JAK3,EPHA2,ALK
Hematological Disease	STE	7.64E-04-2.57E-02	MAP3K14,MAP2K7,MAP4K4,MAP4K1,MAP3K8,TAOK1,MAP3K5
Hematological Disease	Other	2.61E-03-1.35E-02	EIF2AK4,EIF2AK1,IKBKB,EIF2AK2
Hematological Disease	CMK	2.03E-03-4.85E-02	TRIB1,STK17A,PIM1,STK11,MARK2,PRKAA1,PRKAA2,PRKD2,STK17B,CHEK2,PIM2
Hematological Disease	CMGC	2.67E-03-5.77E-03	SRPK2,MAPK14,CLK1,MAPK8,CDK2,CDK1
Hematological Disease	Atypical	1.39E-04-2.94E-02	TRPM6,PRKDC,MTOR,TAF1,BCR,ATM
Hematological Disease	AGCgroup	1.95E-04-2.66E-03	RPS6KB1,AKT2,PRKCQ,SGK1,PDPK1,PRKCZ,ROCK2,AKT1,PRKCI,AKT3,RPS6KA4,RPS6KA5,PRKCB,PRKCA
Inflammatory Response	TKL	1.43E-03-4.6E-03	BRAF,TGFBR2,MAP3K7,BMPR2,IRAK3,RIPK2,IRAK4,IRAK1,KSR1
Inflammatory Response	TK	2.16E-11-1.31E-06	FYN,TYRO3,FLT3,ABL1,EPHA4,JAK2,BLK,PTK2,LCK,EPHB1,MERTK,HCK,PDGFRA,KIT,ERBB2,TEK,FGR,ITK,SRC,FES,CSK,FLT1,TYK2,ERBB3,AXL,CSF1R,DDR1,TIE1,BTK,MET,TEC,SYK,ZAP70,LYN,JAK3
Inflammatory Response	STE	5.64E-03-2.29E-02	MAP3K14,MAP2K2,MAP3K1,MAP2K3,MAP3K8,MAP4K1,MAP3K5,TAOK2,MAP2K1,MAP3K3
Inflammatory Response	Other	9.14E-05-1.79E-02	EIF2AK1,IKBKB,ERN1,IKBKE,TBK1,CHUK,EIF2AK2,AURKB,RNASEL,PBK
Inflammatory Response	CMK	4.51E-03-4.85E-02	MYLK,CAMK4,CAMK1D,PIM1,MARK2,MYLK3,MAPKAPK2
Inflammatory Response	CMGC	3.05E-04-5.96E-03	MAPK8,MAPK9,MAPK11
Inflammatory Response	Atypical	8.7E-04-2.24E-02	MTOR,BCR,ATM
Inflammatory Response	AGCgroup	2.47E-06-4.07E-03	AKT2,PRKCQ,ADRBK1,ADRBK2,GRK5,PRKCZ,PRKCG,ROCK1,PRKX,PRKCI,PRKG1,AKT1,PRKCD,GRK6,PRKCE,AKT3,PRKCA,PRKCB
Metabolic Disease	TKL	1.96E-03-1.96E-03	BMPR1A,ACVR1
Metabolic Disease	Other	6E-05-1.35E-02	EIF2AK1,WNK4,WNK1,EIF2AK3
Metabolic Disease	Atypical	1.42E-03-1.41E-02	TRPM6,ADCK3
Metabolic Disease	AGCgroup	2.02E-06-4.34E-04	RPS6KB1,AKT2,RPS6KA3,PDPK1,ROCK1,PRKCI,AKT1,PRKCD,STK32C,PRKCE,AKT3,RPS6KA1,PRKCA,PRKCB
Nutritional Disease	TKL	1.96E-03-1.96E-03	BMPR1A,ACVR1
Nutritional Disease	RGC	2.33E-02-2.33E-02	GUCY2C
Nutritional Disease	Other	2.23E-02-2.23E-02	IKBKB
Nutritional Disease	CMK	4.64E-02-4.64E-02	SIK3,MARK3,PASK,MARK2,PRKAA2
Ophthalmic Disease	TKL	2.13E-03-2.13E-03	TGFBR2,TGFBR1
Ophthalmic Disease	RGC	5.14E-03-5.46E-03	GUCY2D
Ophthalmic Disease	CMGC	3.87E-03-3.87E-03	MAK
Ophthalmic Disease	Atypical	9.88E-03-9.88E-03	MTOR
Ophthalmic Disease	AGCgroup	3.67E-03-3.67E-03	GRK1
Reproductive System Disease	TKL	2.58E-03-7.9E-03	TGFBR2,BRAF,RAF1,BMPR1B,TGFBR1,ARAF,BMPR1A,ILK,BMPR2,KIAA1804,AMHR2
Reproductive System Disease	TK	6.02E-21-7.26E-07	LMTK2,FYN,JAK1,EPHB2,EPHA4,FGFR3,PTK2,EPHB6,EPHB1,YES1,LCK,INSRR,ERBB4,NTRK1,PDGFRA,IGF1R,KIT,ERBB2,LTK,TEK,EGFR,PDGFRB,ITK,SRC,EPHA1,FLT1,FGFR1,TYK2,FLT4,FGFR2,ERBB3,BMX,TNK2,AXL,CSF1R,DDR1,MET,NTRK2,KDR,PTK6,MST1R,INSR,ALK
Reproductive System Disease	STE	2.27E-03-2.64E-02	PAK1,MAP3K1,NRK,MAP3K4,MST4
Reproductive System Disease	Other	1.73E-04-3.55E-02	EIF2AK1,BMP2K,PEAK1,SGK223,PLK1,AURKA,AURKB,TTK,BUB1B,RNASEL,NRBP1,BUB1,ULK3,NEK2,MOS,NEK4,ERN2,PKMYT1,AURKC,WNK1,NEK9,C9orf96,CAMKK2
Reproductive System Disease	CMK	4.51E-03-3.99E-02	TSSK1B,CAMK4,TSSK2,PIM1,STK11,TSSK6,CAMK2G
Reproductive System Disease	CMGC	1.45E-04-7.72E-03	CSNK2A2,CDK4,CDK6,MAPK8,MAPK9,GSK3B,CDK2
Reproductive System Disease	Atypical	1.42E-03-3.13E-02	PRKDC,MTOR,BCR,TRRAP,ATM,PDK4
Reproductive System Disease	AGCgroup	3.66E-04-4.07E-03	MAST1,AKT2,PRKCQ,AKT1,PRKCI,SGK1,PRKCD,PRKCE,PRKCH,PRKCZ,PRKCB,RPS6KC1,PRKCG
Antimicrobial Response	TKL	2.64E-03-2.64E-03	RIPK3
Antimicrobial Response	Other	2.78E-04-9E-03	IKBKB,TBK1,CHUK,EIF2AK2,RNASEL
Immunological Disease	TKL	2.64E-03-5.28E-03	BRAF,IRAK4
Immunological Disease	TK	3.38E-15-1.57E-06	FYN,SRC,JAK1,FGFR1,FLT4,TYRO3,FLT3,ABL1,JAK2,AXL,ROR1,TIE1,BTK,YES1,LCK,MERTK,SYK,ZAP70,LYN,PDGFRA,KIT,JAK3,EPHA2,PDGFRB
Immunological Disease	STE	7.64E-04-1.47E-02	MAP3K14,STK4,MAP2K7,MAP2K3
Immunological Disease	Other	2.61E-03-1.35E-02	EIF2AK4,IKBKB,EIF2AK2
Immunological Disease	CMK	9E-03-1.35E-02	MARK2,CHEK2
Immunological Disease	CMGC	1.11E-03-5.77E-03	SRPK2,MAPK14,CLK1,MAPK8,MAPK11,CDK2,CDK1
Immunological Disease	Atypical	1.42E-03-4.17E-02	PRKDC,MTOR,BCR,ALPK2,PDK4,ATM
Inflammatory Disease	TKL	2.64E-03-7.9E-03	ACVR1,IRAK3,RIPK2
Inflammatory Disease	STE	1.21E-03-1.77E-02	MAP4K1,MAP3K5,MAP3K3,MAP2K5
Inflammatory Disease	Other	8.81E-04-4.77E-03	IKBKB,STK36,ULK4,CHUK
Inflammatory Disease	CMK	8.04E-03-1.35E-02	CAMK2D,MARK2,MARK1
Inflammatory Disease	CMGC	1.11E-03-1.11E-03	MAPK14,MAPK11
Inflammatory Disease	Atypical	7.07E-03-4.71E-02	RIOK1,MTOR,PDK4,ATM
Inflammatory Disease	AGCgroup	4.38E-03-4.38E-03	RPS6KA5,RPS6KA4
Neurological Disease	TKL	2.64E-03-7.9E-03	BRAF,TGFBR2,ARAF,BMPR1A,LRRK2,ACVRL1
Neurological Disease	TK	1.04E-09-7.26E-07	SRC,ABL1,ERBB3,EPHA3,CSF1R,NTRK2,NTRK3,ERBB4,FGFR4,KDR,IGF1R,PDGFRA,ROS1,ERBB2,RET,EPHA2,EGFR
Neurological Disease	STE	2.96E-03-2.06E-02	PAK1,STK25,STRADA,MAP4K4,MAP3K5,MAP2K1
Neurological Disease	RGC	2.33E-02-2.33E-02	GUCY2C
Neurological Disease	Other	4.51E-03-2.23E-02	IKBKB,STK36,MOS,WNK1,EIF2AK3,PINK1
Neurological Disease	CMK	3.48E-03-4.85E-02	MYLK,DAPK1,TRIO,STK11,BRSK1,MKNK1,OBSCN,CHEK2,BRSK2
Neurological Disease	CMGC	5.24E-06-7.72E-03	CDKL5,CDK3,CDK6,MAPK8,MAPK9,MAPK11,CDK1,CLK4,MAPK14,CDK5,CDK4,CLK2,MAPK10,GSK3B,HIPK2,HIPK1,CDK2,DYRK1A
Neurological Disease	CK1	7.09E-04-1.42E-03	TTBK2,CSNK1D
Neurological Disease	Atypical	1.42E-03-4.39E-02	PRKDC,TRPM6,MTOR,TAF1,TRPM7,ADCK3,BCR,EEF2K,ATM
Neurological Disease	AGCgroup	8.34E-04-3.67E-03	PRKACB,RPS6KB1,AKT2,ADRBK1,SGK1,RPS6KA3,GRK1,PRKCZ,PRKCG,ROCK2,PRKX,AKT1,PRKCD,PRKACA,PRKCE,AKT3,RPS6KA5,MAST3,LATS1,PRKCA,PRKCB
Hepatic System Disease	TKL	5.28E-03-5.28E-03	TGFBR2,MAP3K7
Hepatic System Disease	TK	2.61E-07-6.72E-07	FLT1,FLT3,FLT4,ERBB3,CSF1R,MET,FGFR4,KDR,FER,PDGFRA,KIT,MST1R,ERBB2,RET,TNK1,PDGFRB,EGFR
Hepatic System Disease	STE	5.92E-03-5.92E-03	MAP3K14
Hepatic System Disease	Other	2.65E-04-9.11E-03	IKBKB,TBK1,CHUK
Hepatic System Disease	CMGC	5.27E-04-5.27E-04	CDK4,CDK6,CDK2
Hepatic System Disease	Atypical	1.42E-03-1.41E-02	MTOR
Hypersensitivity Response	TK	3.48E-07-3.48E-07	BTK,FYN,FES,SYK,LYN,HCK,FGR,ITK
Hypersensitivity Response	CMK	3.99E-02-3.99E-02	PIM1
Hypersensitivity Response	CMGC	3.05E-04-3.05E-04	MAPK8,MAPK9
Auditory Disease	Other	4.77E-03-4.77E-03	STK36,ULK4
Dental Disease	RGC	6.11E-03-6.11E-03	NPR2
Renal and Urological Disease	TK	1.11E-10-1.11E-10	FLT1,FGFR1,FLT3,FLT4,CSF1R,FGFR3,MET,LCK,KDR,PDGFRA,KIT,LTK,ERBB2,RET,PDGFRB,EGFR
Renal and Urological Disease	RGC	9.31E-05-9.31E-05	NPR1,NPR2
Renal and Urological Disease	Other	6E-05-3.57E-02	NEK8,IKBKE,PLK1,WNK4,AURKA,WNK1,AURKB
Renal and Urological Disease	CMK	1.35E-02-2.68E-02	MARK2,TSSK6
Renal and Urological Disease	CMGC	6.48E-04-6.48E-04	MAPK1,MAPK8
Renal and Urological Disease	CK1	4.24E-03-4.24E-03	CSNK1E
Renal and Urological Disease	Atypical	1.42E-03-3.35E-02	TRPM6,MTOR
Psychological Disorders	RGC	2.33E-02-2.33E-02	GUCY2C
Psychological Disorders	CMGC	4.33E-04-7.72E-03	CDK5,CDK4,MAPK10,MAPK8,MAPK9,GSK3B,CDK2,CDK1,DYRK1A
Psychological Disorders	Atypical	1.42E-03-9.94E-03	PRKDC,MTOR,TRPM7,EEF2K
Psychological Disorders	AGCgroup	1.4E-03-1.4E-03	PRKACB,RPS6KB1,PRKCD,PRKACA,PRKCE,PRKCZ,PRKCB,PRKCA

## Sheet: Table S3
Supplementary Table S3: Disordered kinases participate in 90% of KKIs
AGC	AGC		Total Intreactions (Inter/Intra Group)
ID(s) interactor A	ID(s) interactor B		Group	Total Interactions	DO-DO	DO-O	O-O	DO mediated interaction %
Q5VT25	Q9Y5S2		AGC	310	222	82	9	0.980645
O15530	Q02156		Atypical	93	78	14	1	0.989247
P17252	Q02156		CAMK	198	160	29	9	0.954545
Q02156	Q15349		CMGC	306	140	140	26	0.915033
Q02156	Q9UBS0		CK1	15	13	2	0	1
O00141	O15530		Other	191	131	56	4	0.979058
O15530	O15530		TK	498	335	34	129	0.740964
O15530	P05771		STE	246	207	39	0	1
O15530	P17612		TKL	246	161	60	25	0.898374
O15530	P23443		RGC	5	1	2	2	0.6
O15530	P31749		Total	2108	0.686907	0.904175	0.0972486
O15530	P31751
O15530	P41743		Uniprot IDs of Kinases participating and not participating in KKI's
O15530	P51812		Kinases Participating in KKI's (SET A)			Kinases not participating in KKI's (SET B)
O15530	Q05513		Uniprot	DO?		Uniprot	DO?
O15530	Q05655		O15530	Y		O14578	Y
O15530	Q15418		Q05513	Y		O15021	Y
O15530	Q16512		P31749	Y		O15075	Y
O15530	Q16513		P17252	Y		O15146	Y
O15530	Q96BR1		P25098	Y		O43781	Y
O15530	Q9HBY8		Q02156	Y		O94768	Y
O15530	Q9UBS0		O95835	Y		P0C263	Y
O15530	Q9Y243		P23443	Y		P0C264	Y
O95835	O95835		Q13976	Y		P11801	Y
O95835	Q6P0Q8		Q9Y243	Y		P34947	Y
O95835	Q9NRM7		P05771	Y		P35626	Y
P17612	P25098		Q6DT37	Y		P49759	Y
P05129	P25098		Q13464	Y		P51817	Y
P05771	P25098		Q6P5Z2	Y		P51956	Y
P17252	P25098		Q15208	Y		P51957	Y
P25098	Q05655		Q15835	Y		P54756	Y
Q6DT37	Q6DT37		P41743	Y		P57058	Y
Q13464	Q13464		O75676	Y		P78368	Y
Q6P5Z2	Q6P5Z2		P43250	Y		Q01974	Y
Q15208	Q15208		Q96S38	Y		Q02846	Y
P23443	P31749		Q04759	Y		Q05823	Y
P23443	Q05513		Q15349	Y		Q07002	Y
Q15835	Q15835		Q9UBS0	Y		Q13470	Y
P17252	Q05513		P31751	Y		Q13523	Y
P17252	Q13976		Q16513	Y		Q14004	Y
P17252	Q15349		Q5VT25	Y		Q15131	Y
Q05513	Q9Y243		O00141	Y		Q15772	Y
Q05655	Q9Y243		O75116	Y		Q2M2I8	Y
P41743	Q05513		Q9Y5S2	Y		Q504Y2	Y
P31749	P31751		P51812	Y		Q52WX2	Y
O75676	O75676		Q15418	Y		Q56UN5	Y
P43250	P43250		Q16512	Y		Q59H18	Y
Q96S38	Q96S38		Q96BR1	Y		Q5JZY3	Y
O75116	Q05655		Q9HBY8	Y		Q5MAI5	Y
Q05513	Q05655		Q6P0Q8	Y		Q6P2M8	Y
Q13976	Q13976		Q9NRM7	Y		Q6P3R8	Y
P31749	Q04759		O60307	Y		Q6P3W7	Y
Q04759	Q05513		P24723	Y		Q6ZN16	Y
P31749	Q16513		O75582	Y		Q6ZWH5	Y
P31749	Q05513		Q13237	Y		Q76MJ5	Y
			Q9UK32	Y		Q7Z2Y5	Y
			Q9Y2H9	Y		Q7Z7A4	Y
AGC	Atypical		Q9Y2H1	Y		Q86TB3	Y
ID(s) interactor A	ID(s) interactor B		Q09013	Y		Q86UX6	Y
Q5VT25	P21675		P21675	Y		Q86YV5	Y
O15530	P42345		P42345	Y		Q86YV6	Y
P41743	Q96Q15		Q96Q15	Y		Q86Z02	Y
P17612	O00418		O00418	Y		Q8IVW4	Y
Q96BR1	Q15118		Q15118	Y		Q8IWB6	Y
Q15418	O00418		P78527	Y		Q8IWU2	Y
Q15418	P42345		Q13315	Y		Q8IY84	Y
P23443	O00418		P11274	Y		Q8IYT8	Y
Q9UBS0	O00418		Q96QT4	Y		Q8IZE3	Y
Q9UBS0	P42345		Q13535	Y		Q8N2I9	Y
Q15208	P42345		Q9Y4A5	Y		Q8N568	Y
P23443	P42345		Q9BVS4	Y		Q8N752	Y
P23443	Q15118		O14730	Y		Q8NCB2	Y
P17252	P42345		Q8NI60	Y		Q8NE28	Y
P31749	P78527		Q9BX84	Y		Q8NE63	Y
Q05655	P78527		P54646	Y		Q8TEA7	Y
O00141	Q15118		Q15139	Y		Q8WU08	Y
Q16512	Q15118		O43293	Y		Q8WXR4	Y
Q16513	Q15118		P49137	Y		Q92519	Y
O00141	Q15119		O60285	Y		Q92772	Y
P31749	Q15119		Q9Y2K2	Y		Q96C45	Y
P31749	P42345		Q8WZ42	Y		Q96D53	Y
Q05655	P42345		Q15746	Y		Q96GX5	Y
			O14757	Y		Q96KG9	Y
AGC	CAMK		O96017	Y		Q96L96	Y
ID(s) interactor A	ID(s) interactor B		Q7KZI7	Y		Q96NX5	Y
O60307	P54646		Q96L34	Y		Q96PF2	Y
P24723	Q15139		Q96RU7	Y		Q96PN8	Y
Q02156	Q15139		Q15831	Y		Q96PY6	Y
Q05513	O43293		P27448	Y		Q96Q04	Y
P31749	P49137		Q32MK0	Y		Q96QP1	Y
P17612	Q9Y2K2		Q9BUB5	Y		Q96QS6	Y
O95835	O60285		Q13131	Y		Q96S44	Y
Q6P0Q8	Q8WZ42		Q16644	Y		Q96S53	Y
P17252	Q15746		O94806	Y		Q99570	Y
Q9NRM7	O14757		Q9UQM7	Y		Q9BQI3	Y
Q9NRM7	O96017		Q9HBH9	Y		Q9BRS2	Y
P41743	Q7KZI7		P53355	Y		Q9BYP7	Y
P41743	Q96L34		O14936	Y		Q9BYT3	Y
P31751	Q96RU7		Q9P1W9	Y		Q9C098	Y
O75582	Q15831		Q8TDC3	Y		Q9H3Y6	Y
P31749	O14757		Q8IWQ3	Y		Q9H792	Y
P31749	Q96RU7		Q14680	Y		Q9HCP0	Y
Q13237	Q15746		Q9NRH2	Y		Q9NR20	Y
P17612	Q15831		Q8IU85	Y		Q9NSY0	Y
P23443	Q15831		Q96RG2	Y		Q9NSY1	Y
P51812	Q15831		Q16566	Y		Q9NY57	Y
P05129	Q96L34		Q9P0L2	Y		Q9NYV4	Y
Q04759	P27448		Q9H1R3	Y		Q9UEE5	Y
			Q96RU8	Y		Q9UPE1	Y
AGC	CMGC		O75962	Y		Q9UPZ9	Y
ID(s) interactor A	ID(s) interactor B		Q13555	Y		Q9UQB9	Y
P22612	Q00537		P11309	Y		Q9Y6M4	Y
Q16512	P53778		O60229	Y		Q9Y6S9	Y
P22694	P68400		Q9H093	Y		O14874	N
P23443	P45984		Q9BXA7	Y		P16066	N
O75582	Q16539		Q13554	Y		P20594	N
O75676	Q16539		Q13557	Y		P25092	N
P31749	Q16539		P57059	Y		P32298	N
P51812	Q16539		Q9BZL6	Y		P51841	N
Q16512	Q16539		Q5VST9	Y		Q16654	N
P23443	P45983		Q9H0K1	Y		Q3MIX3	N
P31749	P45983		P48729	Y		Q6J9G0	N
P17252	P49840		P48730	Y		Q6PHR2	N
P17252	P49841		Q86Y07	Y		Q7Z695	N
P41743	P50613		Q99986	Y		Q86TW2	N
P31751	P49841		Q8IV63	Y		Q86V86	N
O75676	P28482		Q5TCY1	Y		Q8N165	N
P23443	P28482		P49674	Y		Q8NFD2	N
P31749	P28482		Q6IQ55	Y		Q8WTQ7	N
P51812	P28482		Q00537	Y		Q9BXA6	N
Q02156	P28482		P68400	Y		Q9BXU1	N
Q05513	P28482		P45984	Y
Q05655	P28482		P45983	Y
Q15349	P28482		P49840	Y
Q15418	P28482		P49841	Y
O75676	P27361		P27361	Y
P23443	P27361		Q16659	Y
P25098	P27361		Q15759	Y
P51812	P27361		Q00536	Y
Q02156	P27361		Q13164	Y
Q05513	P27361		O15264	Y
Q05655	P27361		P49336	Y
Q15349	P27361		Q92630	Y
Q15418	P27361		P49760	Y
Q9UK32	P27361		P50750	Y
P24723	P24941		P31152	Y
P05771	Q16659		Q9H2X6	Y
O75582	Q15759		P78362	Y
P31749	P49840		P53779	Y
P31749	P49841		P20794	Y
Q9Y2H9	Q00535		Q9HAZ1	Y
O95835	P06493		Q13627	Y
P17612	Q00536		Q8TD08	Y
P17612	P49840		Q9UQ88	Y
P17612	P49841		Q9Y463	Y
O00141	P49841		O76039	Y
P05771	P49841		Q9UBE8	Y
Q05513	P49841		O94921	Y
Q96BR1	P49841		Q9H422	Y
P05771	P49840		Q96SB4	Y
Q96BR1	P49840		Q9UQ07	Y
P23443	P06493		P49761	Y
P23443	P68400		Q9BWU1	Y
O00141	Q13164		Q96Q40	Y
O00141	P49840		P53350	Y
P05129	P49840		Q99640	Y
Q05513	P49840		Q9NYY3	Y
Q05655	P49840		Q9HC98	Y
			Q9Y3S1	Y
AGC	Other		O00444	Y
ID(s) interactor A	ID(s) interactor B		O75460	Y
O00141	Q96J92		Q9H4B4	Y
Q6DT37	Q9UHD2		Q14164	Y
O00141	Q9HC98		Q9UKI8	Y
P23443	Q9HC98		Q6XUX3	Y
O00141	Q9H4A3		O14965	Y
P31749	Q9H4A3		P19525	Y
Q6P0Q8	Q9NRP7		Q9NZJ5	Y
P17252	O14920		Q86UE8	Y
P17252	O15111		O60566	Y
P05771	O14920		Q8NG66	Y
P31749	O14920		Q96GD4	Y
P41743	O14920		Q8TF76	Y
Q04759	O14920		Q8TDR2	Y
Q05513	O14920		P30291	Y
Q05655	O14920		Q96J92	Y
O75116	Q14164		Q9H4A3	Y
Q9NRM7	O14965		Q9NRP7	Y
Q9NRM7	Q96GD4		O14920	Y
P41743	O15111		O75716	Y
O95835	Q96GD4		Q8N5S9	Y
P31751	O15111		Q96RR4	Y
O75116	O15111		P33981	Y
O75116	O75716		Q9BXM7	Y
P31749	O15111		Q8TD19	Y
P31749	Q8N5S9		O75385	Y
P17612	O14965		P51955	Y
P17612	Q96RR4		O00311	Y
O00141	Q8N5S9		O14976	Y
O00141	Q9Y3S1		Q9UHY1	Y
P05771	O15111		O43683	Y
Q15418	P33981		Q8TAS1	Y
Q04759	O15111		P00540	Y
Q05655	O15111		Q86SG6	Y
O00141	Q96RR4		Q9P2K8	Y
			Q99558	Y
			Q9Y6R4	Y
AGC	RGC		O14733	Y
ID(s) interactor A	ID(s) interactor B		Q13233	Y
Q13976	P16066		Q99683	Y
			Q99759	Y
			Q13153	Y
AGC	STE		Q13177	Y
ID(s) interactor A	ID(s) interactor B		Q02750	Y
O15530	Q13153		Q92918	Y
P31749	Q99683		O96013	Y
P31749	Q13153		Q9Y4K4	Y
Q05655	Q13153		Q9UEW8	Y
Q04759	Q8IVH8		P45985	Y
P31749	P45985		P46734	Y
Q16512	P52564		P52564	Y
O75676	Q02750		P36507	Y
P41743	Q02750		Q9NQU5	Y
Q05513	Q02750		Q9Y2U5	Y
Q15349	Q02750		Q9UKE5	Y
Q9NRM7	Q13188		Q7L7X3	Y
Q02156	O95819		Q9C0K7	Y
P41743	Q13163		O95382	Y
Q16512	P46734		Q7RTN6	Y
Q16513	Q9Y2U5		Q9H2K8	Y
P31749	P41279		Q8IVH8	Y
P31749	Q13043		Q13188	Y
Q04759	Q9UEW8		O95819	Y
O95835	Q13043		P41279	Y
Q9Y2H1	Q9Y6E0		Q13043	Y
O95835	Q13188		Q9Y6E0	Y
P17612	Q99759		O95747	Y
Q9Y5S2	Q13163		Q9H2G2	Y
Q05513	Q13163		O75914	Y
			O00506	Y
			Q9P289	Y
AGC	TK		Q12851	Y
ID(s) interactor A	ID(s) interactor B		Q8N4C8	Y
O15530	Q14289		O94804	Y
Q05655	Q14289		Q9P286	Y
P17612	P41240		Q8NEV4	Y
O15530	P12931		Q9UL54	Y
P17252	P06213		Q14289	Y
Q05655	P06213		P12931	Y
Q13464	Q05397		P06213	Y
P17252	P06239		Q05397	Y
P17612	P06239		P00533	Y
Q04759	P06239		P23458	Y
Q05655	P06239		P29597	Y
P17252	P00533		P43405	Y
P17252	P10721		Q06187	Y
P17252	P12931		P09619	Y
P17252	P23458		P06241	Y
P17252	P29597		P07948	Y
P17252	P43405		Q04912	Y
P17252	Q06187		P00519	Y
P41743	P12931		P11362	Y
P25098	P09619		P08069	Y
P23443	P43405		O60674	Y
Q15349	P43405		P07332	Y
Q15418	P43405		P08631	Y
Q9UBS0	P43405		P42684	Y
P24723	P06241		P51451	Y
Q02156	P06241		P34925	Y
Q04759	P06241		P17948	Y
Q05513	P06241		P35968	Y
Q05655	P06241		Q9UM73	Y
Q04759	P07948		P51813	Y
Q05655	P07948		P29323	Y
P31749	Q04912		Q08345	Y
P17612	P00533		P21860	Y
P25098	P00533		Q6ZMQ8	Y
Q05655	P00533		P21802	Y
Q9Y2H9	P00533		P04626	Y
P31749	P12931		Q07912	Y
P17612	P12931		P07947	Y
P23443	P12931		O15197	Y
P24723	P12931		P07333	Y
P25098	P12931		P16234	Y
Q02156	P12931		P16591	Y
Q05513	P12931		P21709	Y
Q05655	P12931		P22455	Y
Q9UBS0	P12931		P22607	Y
P05771	Q06187		P30530	Y
P23443	Q06187		P35916	Y
Q02156	Q06187		P42679	Y
Q04759	Q06187		P42681	Y
Q05513	Q06187		P43403	Y
Q9UBS0	Q06187		P54753	Y
P25098	P29317		Q06418	Y
P05771	P10721		Q15303	Y
Q05655	P00519		Q16620	Y
Q15418	P11362		P29376	Y
Q05655	P08069		Q01973	Y
Q05513	P23458		P14616	Y
			Q16832	Y
			Q13308	Y
AGC	TKL		Q8NB16	Y
ID(s) interactor A	ID(s) interactor B		O00238	Y
O75582	Q9NYL2		P36894	Y
Q16512	Q9NYL2		O43318	Y
Q5VT25	P53667		O43187	Y
Q5VT25	P53671		P51617	Y
O15530	Q13418		Q9NWZ3	Y
P22694	P36896		P10398	Y
O00141	P15056		O43353	Y
P17252	P15056		Q13546	Y
P17612	P15056		P15056	Y
P31749	P15056		P53667	Y
Q02156	P15056		Q5S007	Y
Q15349	P15056		Q15569	Y
Q9UBS0	P15056		P04049	Y
Q13464	P53667		P80192	Y
Q13464	P53671		Q02779	Y
P17252	P04049		Q13705	Y
P41743	P51617		Q9NYL2	Y
Q13976	P04049		Q38SD2	Y
Q13976	Q13873		Q6VAB6	Y
O00141	P04049		Q8IVT5	Y
P17612	P04049		O43283	Y
P31749	P04049		Q12852	Y
Q02156	P04049		Q13873	Y
Q05513	P04049		Q9Y616	Y
Q05655	P04049		P53671	Y
Q09013	P04049		Q80XI6	Y
P31749	P51617		Q9Y572	Y
P31749	Q13418		P57078	Y
O95835	P53667		Q16671	Y
P17612	P53667		Q5TCX8	Y
P05771	P57078		Q05655	N
P05771	Q13873		P17612	N
Q05655	P57078		P05129	N
Q9Y5S2	Q13546		P22612	N
Q05513	P51617		P22694	N
			Q15119	N
			Q15120	N
Atypical	Atypical		Q8IW41	N
ID(s) interactor A	ID(s) interactor B		Q14012	N
P21675	Q9Y4A5		Q6SA08	N
P78527	Q13315		Q9UIK4	N
Q13315	Q13535		P15735	N
Q15118	Q15118		Q16816	N
Q15118	Q15119		P53778	N
P11274	P11274		Q16539	N
Q15119	Q15119		P50613	N
Q96QT4	Q9BX84		P28482	N
			P24941	N
			Q00535	N
Atypical	CAMK		P06493	N
ID(s) interactor A	ID(s) interactor B		P19784	N
Q13315	Q32MK0		P11802	N
O00418	P49137		Q00526	N
P78527	Q9BUB5		Q00532	N
O00418	P54646		Q00534	N
O00418	Q13131		Q8IZL9	N
O00418	Q16644		Q9UHD2	N
O00418	Q8IW41		Q8TDX7	N
Q13315	O14757		O15111	N
Q13315	O96017		Q96KB5	N
Q13315	Q15831		Q9H5K3	N
Q13315	Q8WZ42		Q13163	N
P42345	Q13131		P41240	N
P78527	O14757		P06239	N
Q13535	O14757		P10721	N
P21675	O94806		P29317	N
Q13535	O96017		P08581	N
			P29320	N
			Q16288	N
Atypical	CMGC		P07949	N
ID(s) interactor A	ID(s) interactor B		P04629	N
O00418	P53778		P52333	N
O00418	Q15759		P42680	N
O00418	O15264		P09769	N
Q9Y4A5	P49336		P29322	N
P42345	P49841		P35590	N
Q9BVS4	P68400		P36888	N
Q13315	Q92630		P42685	N
O00418	P06493		P54762	N
O00418	P45983		P54764	N
O00418	P45984		Q13882	N
O00418	Q16539		Q15375	N
P78527	P45984		Q9UF33	N
Q13535	P49760		Q08881	N
P78527	P45983		Q12866	N
P78527	P19784		P54760	N
P21675	P68400		P08922	N
Q13535	P50750		Q02763	N
P78527	P68400		P36897	N
			P36896	N
			P27037	N
Atypical	Other		P37023	N
ID(s) interactor A	ID(s) interactor B		Q04771	N
P78527	O14920		P37173	N
P78527	O15111		Q13418	N
P78527	Q96RR4		Q8NER5	N
P78527	Q9BXM7
Atypical	STE
ID(s) interactor A	ID(s) interactor B
P11274	Q9Y4K4
Q13315	Q9H2K8
P78527	Q99759
O14730	Q13177
Atypical	TK
ID(s) interactor B	ID(s) interactor A
P11274	O60674
P11274	P00519
P11274	P07332
P11274	P08631
P11274	P10721
P11274	P12931
P11274	P42684
P11274	P51451
P78527	P34925
Q15120	P00533
Q13315	P00519
P78527	P07948
Q13535	P17948
P78527	P00519
Q13535	P35968
Atypical	TKL
ID(s) interactor A	ID(s) interactor B
Q13315	O43318
P11274	Q38SD2
Q8NI60	O43187
Q8NI60	P51617
P78527	Q9Y572
CAMK	CAMK
ID(s) interactor A	ID(s) interactor B
Q13131	Q8TDC3
Q32MK0	Q8WZ42
Q15139	Q15139
Q15139	Q7KZI7
O43293	O43293
Q13554	Q9UQM7
Q13555	Q9UQM7
Q13557	Q9UQM7
Q9UIK4	Q9UQM7
P53355	P53355
Q13131	Q8IWQ3
P49137	Q8IW41
O14757	O96017
Q9BUB5	Q9BUB5
P27448	Q9Y2K2
P57059	Q9Y2K2
Q13131	Q9Y2K2
Q15831	Q9Y2K2
O60285	Q13131
O60285	Q96L34
O14936	Q9BZL6
Q9BZL6	Q9BZL6
Q13554	Q13555
Q13555	Q13555
Q13555	Q13557
Q13555	Q15746
Q13554	Q13554
Q13554	Q13557
Q13557	Q13557
P27448	Q15831
P54646	Q15831
P57059	Q15831
Q13131	Q15831
Q15831	Q7KZI7
Q15831	Q96L34
Q15831	Q9NRH2
Q15831	Q9P0L2
P27448	P57059
P57059	Q13131
Q5VST9	Q8WZ42
P27448	Q96L34
Q13131	Q96L34
Q7KZI7	Q96L34
Q96L34	Q96L34
Q96L34	Q9P0L2
Q13131	Q9NRH2
P54646	Q13131
Q13131	Q9H093
Q13131	Q9H0K1
Q13131	Q9P0L2
P27448	Q9P0L2
Q7KZI7	Q9P0L2
O96017	Q9BXA7
Q9UIK4	Q9UIK4
Q16566	Q16566
P27448	Q7KZI7
Q14012	Q14012
P15735	Q16816
Q16816	Q16816
Q7KZI7	Q7KZI7
CAMK	CMGC
ID(s) interactor A	ID(s) interactor B
Q8IW41	P31152
Q8IW41	P53778
Q15139	O15264
Q15139	P45983
Q15139	P45984
Q9UQM7	Q00535
P49137	P27361
P49137	P28482
P49137	Q16539
Q9BUB5	P27361
Q9BUB5	P28482
Q9BUB5	Q16539
Q9BUB5	Q9H2X6
Q9HBH9	P28482
Q9HBH9	P45983
Q9HBH9	Q16539
Q8IW41	P45984
Q16644	Q16539
Q8IW41	Q16539
Q16644	O15264
Q16644	Q15759
P53355	P28482
Q8IW41	P28482
O14936	P50750
P53355	P27361
Q15746	P27361
Q8IW41	Q16659
Q8IW41	Q15759
Q8IW41	O15264
O14757	P68400
Q15831	P49841
Q7KZI7	P49841
Q9P1W9	P49841
O94806	P49840
CAMK	Other
ID(s) interactor A	ID(s) interactor B
Q8TDC3	P30291
O14936	Q9NYY3
Q8IWQ3	P30291
Q14680	O75716
O96017	Q9H4B4
O14757	Q8TD19
Q8WZ42	Q8TD19
P27448	O14920
Q9NRH2	O75716
Q8IU85	Q8N5S9
Q13131	O75385
P54646	O75385
P54646	Q96RR4
Q96RG2	O75716
O96017	P53350
Q14012	Q8N5S9
Q16566	Q8N5S9
O14757	O15111
O14757	Q9UKI8
Q16566	Q96RR4
Q14012	Q96RR4
CAMK	STE
ID(s) interactor A	ID(s) interactor B
P54646	Q99683
Q7KZI7	Q7L7X3
Q9P0L2	Q7L7X3
Q15746	Q13153
Q15831	Q9C0K7
Q9BUB5	Q13177
Q9H1R3	Q13233
Q9H1R3	Q99759
Q96RU8	P45985
Q96RU7	Q02750
Q96RU8	Q02750
P54646	O95382
Q96RU7	O14733
Q96RU8	O14733
Q15831	Q7RTN6
Q15746	Q13177
Q7KZI7	Q99759
CAMK	TK
ID(s) interactor A	ID(s) interactor B
O75962	Q05397
Q15746	Q9UM73
Q15139	P00519
Q15139	P00533
Q15139	P08069
Q15139	P12931
Q15139	P43405
Q15139	Q06187
O43293	P08581
Q9UQM7	P00533
Q9H1R3	Q06187
Q13555	P00533
P11309	P29320
P11309	P51813
Q15746	P12931
O60229	P29323
CAMK	TKL
ID(s) interactor A	ID(s) interactor B
Q9H093	Q04771
P49137	P53667
Q6SA08	P36897
Q13131	P04049
P53355	Q9Y572
Q9BXA7	P36897
Q9BXA7	P37173
Q9H093	P36897
Q9UIK4	P36897
Q96RU7	Q13873
P27448	Q8IVT5
CK1	CK1
ID(s) interactor A	ID(s) interactor B
Q99986	Q99986
Q5TCY1	Q6IQ55
P49674	P49674
CK1	Other
ID(s) interactor A	ID(s) interactor B
Q99986	Q9H4B4
Q8IV63	P53350
CK1	CAMK
ID(s) interactor A	ID(s) interactor B
P48729	Q9BZL6
CK1	CMGC
ID(s) interactor A	ID(s) interactor B
P48730	Q00535
Q86Y07	P45983
CK1	STE
ID(s) interactor A	ID(s) interactor B
Q86Y07	O14733
Q86Y07	Q02750
CK1	TK
ID(s) interactor A	ID(s) interactor B
P48730	P35968
CK1	TKL
ID(s) interactor A	ID(s) interactor B
P48729	P36897
Q86Y07	O43318
Q86Y07	Q8IVT5
P48729	Q13546
CMGC	CMGC
ID(s) interactor A	ID(s) interactor B
P31152	P31152
P78362	Q96SB4
P53778	P53778
P53779	Q00535
P20794	Q8IZL9
P24941	Q8IZL9
Q9HAZ1	Q9HAZ1
Q00537	Q00537
Q15759	Q16539
Q00535	Q00536
Q00536	Q00536
P11802	Q00535
P28482	Q00535
P49841	Q00535
Q00535	Q00535
P11802	Q00534
Q16659	Q9UQ07
P68400	Q9UQ88
P49840	P49841
Q00526	Q00526
P49760	P49761
P45983	P45984
P49760	P49760
Q13627	Q13627
P19784	Q16539
P27361	Q16539
P28482	Q16539
P45983	Q16539
P68400	Q16539
Q16539	Q9Y463
P27361	P45983
P28482	P45983
P19784	P19784
P19784	P68400
P49336	P50750
P49336	Q9BWU1
Q8TD08	Q8TD08
P50613	P50750
P06493	P50613
P06493	P68400
P68400	P68400
P11802	P50613
P24941	P50613
P50613	Q9BWU1
P24941	Q96Q40
P27361	P28482
P28482	P28482
P28482	Q9Y463
P49840	P49840
Q9H2X6	Q9UBE8
P24941	P24941
CMGC	Other
ID(s) interactor A	ID(s) interactor B
P50613	Q9HC98
P28482	Q9H4B4
Q16539	O14920
Q16539	Q96RR4
P06493	Q96GD4
P28482	P51955
P06493	P19525
Q00526	P19525
P24941	O00311
P24941	P30291
Q16659	P33981
Q16659	P53350
P11802	O00311
Q00535	O14976
P06493	Q99640
P49841	O14965
P49841	Q9UHY1
P50750	Q9NRP7
P50750	O00311
P06493	O43683
P06493	P30291
P06493	Q96KB5
P68400	O15111
P68400	P30291
CMGC	STE
ID(s) interactor A	ID(s) interactor B
P27361	Q99558
P53778	P45985
P53778	P46734
P53778	P52564
P53779	P45985
P27361	P36507
P28482	P36507
P19784	Q13153
P28482	Q13153
P68400	Q13153
Q00535	Q13153
Q9UQ88	Q13153
Q9Y463	Q13153
O15264	Q9Y6R4
P45984	O14733
P45984	P45985
P45984	Q13233
P45983	P45985
Q16539	P45985
Q16539	O14733
Q16539	P46734
Q16539	P52564
Q16539	Q02750
Q16539	Q9NQU5
Q16539	Q9UEW8
P45983	O14733
P45983	Q13233
P45983	Q9Y2U5
O15264	P52564
P27361	Q02750
P28482	Q02750
Q00535	Q02750
P06493	Q9NQU5
P28482	Q9UKE5
P28482	Q13177
P28482	Q13233
P27361	P46734
Q9Y463	P46734
P27361	Q13177
P49841	Q13163
Q13164	Q13163
CMGC	TK
ID(s) interactor A	ID(s) interactor B
P28482	Q9UM73
Q8TD08	P41240
P27361	P06213
P27361	Q16288
P28482	Q16288
Q16539	Q16288
P27361	P34925
P28482	P34925
Q16539	P07949
Q16539	P12931
Q16539	P29323
P45983	P07949
P45983	P12931
P27361	P06239
P28482	P06239
P27361	P43405
P28482	P00533
P28482	P07948
P28482	P07949
P28482	P12931
P28482	Q06187
O76039	P06241
P06493	P06241
Q00535	P06241
P27361	P07949
P06493	P07948
P11802	P07948
P24941	P07948
P27361	P07948
P27361	P04629
Q16659	Q08345
P49841	Q05397
P06493	P00533
P68400	P12931
Q00535	P12931
Q8TD08	P12931
P06493	P52333
Q00537	P29317
Q00535	P00519
Q00535	P21860
Q00535	Q6ZMQ8
O76039	P00519
P06493	P00519
CMGC	TKL
ID(s) interactor A	ID(s) interactor B
P45983	O43318
Q16539	O43318
Q16659	O43318
Q9H2X6	O43318
Q9UBE8	O43318
O94921	Q04771
P27361	P15056
P28482	P15056
Q16539	P36897
Q16539	P51617
Q16539	P53667
P45983	P04049
P45983	P51617
P45983	Q13546
P45983	Q13873
Q16659	Q12852
Q9H422	P53671
P28482	P04049
P28482	Q6VAB6
P28482	Q8IVT5
P27361	P04049
P27361	Q6VAB6
Q13164	P04049
P11802	O00238
P11802	P36897
P06493	Q8NB16
O94921	P36897
P19784	P36897
Q00532	P36897
Q00534	P36897
Q00537	P36897
P49841	Q13418
P49841	Q80XI6
P06493	P37173
P49840	Q80XI6
O94921	O00238
Other	Other
ID(s) interactor A	ID(s) interactor B
O14920	Q9UHD2
Q14164	Q9UHD2
O14920	P53350
O14965	P53350
O43683	P53350
O60566	P53350
P30291	P53350
P53350	Q99640
P53350	Q9NYY3
P30291	Q9HC98
Q8TD19	Q9HC98
Q8TDX7	Q9HC98
Q9H4A3	Q9Y3S1
O00444	O00444
O75460	O75460
Q9H4B4	Q9H4B4
O75716	Q14164
Q8TD19	Q8TDX7
O14965	Q9UKI8
Q86UE8	Q9UKI8
Q14164	Q6XUX3
O14920	O14965
O14920	O15111
O14920	P19525
O14920	Q14164
O14920	Q9NZJ5
O15111	Q14164
Q96KB5	Q96KB5
O14965	O15111
O14965	Q86UE8
O43683	O60566
O15111	P19525
P51955	Q8NG66
Q8TF76	Q96GD4
Q8TF76	Q8TF76
Q86UE8	Q86UE8
Q9NZJ5	Q9NZJ5
Q8TDR2	Q8TDR2
P30291	P30291
Other	STE
ID(s) interactor A	ID(s) interactor B
Q96J92	O95747
Q96J92	Q9UEW8
O14920	Q99558
O15111	Q99558
Q9H4A3	O95747
Q9H4A3	Q02750
Q9H4A3	Q99759
Q9H4A3	Q9UEW8
Q9H4A3	Q9Y2U5
Q9HC98	Q9NQU5
O75460	Q99683
P19525	Q99683
O75460	Q9H2K8
P53350	Q13153
Q14164	Q13153
O60566	Q9Y6R4
Q9H4B4	Q02750
O14920	Q13233
O14920	Q99759
Q14164	Q9H2G2
O15111	Q13233
P53350	Q13188
P53350	O75914
O15111	P41279
O15111	Q99759
Other	TK
ID(s) interactor B	ID(s) interactor A
Q9UHD2	P21802
O14976	Q9UM73
Q8TAS1	P00519
O14920	P12931
Q14164	P21802
Q96GD4	P21802
P19525	P09619
P53350	P21802
P00540	P06241
Q86SG6	P06241
Q9Y3S1	P06241
Q86SG6	P00519
P19525	P23458
P19525	P29597
O15111	P12931
O00444	P42680
Q9Y3S1	P00519
Other	TKL
ID(s) interactor A	ID(s) interactor B
Q96KB5	P10398
Q9H4A3	P10398
O14920	O43318
O15111	O43318
P19525	O43318
Q9HC98	P36897
O14920	Q04771
Q86SG6	Q04771
Q9H5K3	O00238
Q9H5K3	P36897
O14920	O43283
O14920	P36897
O14920	P51617
O14920	Q13546
Q96GD4	P36897
P00540	Q13873
Q86SG6	P36897
Q96KB5	P04049
Q8TDR2	O00238
Q8TDR2	P36897
O00444	P36897
O15111	P36897
Q9P2K8	P36897
O15111	P51617
Q96RR4	P51617
RGC	RGC
ID(s) interactor A	ID(s) interactor B
P16066	P16066
P20594	P20594
RGC	TK
ID(s) interactor B	ID(s) interactor A
Q02846	P06241
P25092	P12931
STE	STE
ID(s) interactor A	ID(s) interactor B
Q13043	Q13188
Q13043	Q7L7X3
P41279	Q99558
P45985	Q99558
P52564	P52564
P52564	Q99683
P52564	Q9UL54
P52564	Q9Y6R4
O00506	Q9Y6E0
Q9P289	Q9Y6E0
P45985	Q12851
Q12851	Q13233
O14733	Q02750
P36507	Q02750
P41279	Q02750
Q02750	Q13153
Q02750	Q13233
Q02750	Q9Y6R4
Q9UKE5	Q9UKE5
Q13163	Q99759
Q13163	Q9Y2U5
Q13188	Q13188
O95819	Q13233
O14733	Q99683
O95382	Q99683
P45985	Q99683
P46734	Q99683
Q99683	Q99759
Q99683	Q9Y2U5
P46734	Q7L7X3
Q9Y4K4	Q9Y4K4
O75914	O75914
P46734	Q9UL54
P46734	Q9Y6R4
P41279	P41279
P41279	P45985
O95747	Q13153
O14733	Q13233
P45985	Q13233
Q8N4C8	Q8N4C8
P45985	Q9Y6R4
O00506	Q9P289
Q13177	Q13177
O94804	O94804
O14733	Q9Y2U5
P45985	Q9Y2U5
Q99759	Q9Y2U5
Q9P286	Q9P286
O14733	P45985
STE	TK
ID(s) interactor B	ID(s) interactor A
Q99558	P00533
Q9Y6R4	Q14289
O14733	Q9UM73
Q13233	Q9UM73
Q99683	Q9UM73
Q99759	Q9UM73
Q99683	P08069
Q13153	P00533
Q13153	P04626
Q13153	P51813
Q13177	Q07912
Q13177	P06239
Q02750	P00533
Q02750	P29323
Q92918	P43405
O96013	P21802
Q13177	P06241
Q92918	P06241
Q9Y4K4	P06241
Q13177	P07947
Q13177	P07948
Q92918	P07948
Q99759	P07948
Q92918	P00519
Q92918	P00533
Q92918	P12931
Q9UEW8	Q6ZMQ8
Q13177	P12931
Q13177	P00519
Q9Y4K4	P00519
Q13177	P08631
Q9Y4K4	P08631
STE	TKL
ID(s) interactor A	ID(s) interactor B
O95747	P36897
Q13153	P36897
Q8NEV4	P36897
Q99558	O43318
Q99558	Q13546
O14733	Q9NYL2
P45985	Q9NYL2
P52564	Q9NYL2
P36507	P10398
Q02750	P10398
Q13188	P04049
O14733	O43318
O95819	O43318
P45985	O43318
P52564	O43318
Q13233	O43318
Q92918	O43318
Q99683	O43318
Q99759	O43318
Q9C0K7	O43318
Q13153	Q04771
Q99683	P04049
O96013	P53667
Q13153	P53667
Q13177	P53667
O96013	Q38SD2
P41279	Q6VAB6
Q02750	Q6VAB6
O75914	P04049
P36507	P04049
P36507	P15056
P36507	Q8IVT5
Q02750	P15056
Q13177	P15056
Q13233	P15056
Q13153	O00238
Q13153	P04049
Q13153	P37173
P45985	Q02779
O14733	O43283
P45985	Q12852
Q02750	Q8IVT5
O95747	O00238
Q9P289	P04049
O14733	Q12852
Q02750	P04049
P41279	Q13546
Q99759	Q13546
P41279	Q13873
Q13233	P04049
Q13177	P04049
TK	TK
ID(s) interactor A	ID(s) interactor B
O15197	P54762
O15197	P54760
O60674	P12931
O60674	Q14289
O60674	Q9UM73
O60674	P52333
O60674	P06213
O60674	P00519
O60674	P08069
O60674	P07332
O60674	P11362
O60674	P42680
O60674	O60674
O60674	P00533
O60674	P04626
O60674	P06241
O60674	P07947
O60674	P07948
O60674	P09619
O60674	P10721
O60674	P21860
O60674	P29597
O60674	Q04912
O60674	Q05397
P00519	P12931
P00519	Q06187
P00519	P00519
P00519	P00533
P00519	P04626
P00519	P04629
P00519	P06241
P00519	P08631
P00519	P08922
P00519	P10721
P00519	P21860
P00519	P23458
P00519	P29323
P00519	P42684
P00519	P43403
P00519	Q15303
P00533	P12931
P00533	Q14289
P00533	Q01973
P00533	P41240
P00533	P51451
P00533	P16591
P00533	P54760
P00533	Q07912
P00533	P29317
P00533	P07332
P00533	Q13882
P00533	P08581
P00533	Q15303
P00533	P42684
P00533	P43403
P00533	P09619
P00533	P04626
P00533	P43405
P00533	P07947
P00533	P07948
P00533	P51813
P00533	Q05397
P00533	P21860
P00533	P00533
P04626	P12931
P04626	Q14289
P04626	P41240
P04626	P51451
P04626	P16591
P04626	Q08881
P04626	Q13882
P04626	Q15303
P04626	P42680
P04626	P42681
P04626	P42684
P04626	P04626
P04626	P09769
P04626	P21860
P04626	P23458
P04626	P42679
P04626	P43405
P04626	P51813
P04626	Q05397
P04629	P04629
P04629	P42679
P06213	P12931
P06213	P41240
P06213	P08069
P06213	P14616
P06213	P23458
P06213	Q05397
P06239	Q14289
P06239	P41240
P06239	P52333
P06239	P30530
P06239	Q08881
P06239	P06241
P06239	P07948
P06239	P10721
P06239	P43403
P06239	P43405
P06239	Q05397
P06241	P12931
P06241	Q14289
P06241	P41240
P06241	P54753
P06241	P17948
P06241	Q08881
P06241	P54764
P06241	P35968
P06241	Q07912
P06241	P07333
P06241	Q06418
P06241	P42681
P06241	P42684
P06241	P43403
P06241	P09619
P06241	P43405
P06241	P21802
P06241	P07947
P06241	P07948
P06241	P10721
P06241	P29322
P06241	P29597
P06241	Q05397
P06241	Q16620
P07332	P52333
P07332	P23458
P07333	P12931
P07333	P07947
P07333	P07948
P07947	P12931
P07947	P17948
P07947	P35968
P07947	Q06418
P07947	P09619
P07947	P07947
P07947	P07948
P07947	P10721
P07947	Q04912
P07947	Q05397
P07948	Q14289
P07948	P41240
P07948	Q06187
P07948	P42680
P07948	P43405
P07948	P21802
P07948	P10721
P07948	P29597
P07948	P42679
P07948	Q05397
P07949	P12931
P07949	P07949
P07949	Q05397
P08069	P12931
P08069	P41240
P08069	P23458
P08069	Q05397
P08581	P12931
P08581	P35968
P08631	P41240
P08631	Q06187
P08631	P42684
P08631	P10721
P08631	P21860
P09619	P12931
P09619	P16234
P09619	Q07912
P09619	P09619
P09619	P23458
P09619	P29597
P09619	Q05397
P09769	P12931
P09769	P41240
P09769	P43405
P09769	Q05397
P10721	P12931
P10721	P16234
P10721	Q06187
P10721	P42680
P10721	P42679
P11362	P12931
P11362	P54764
P11362	P11362
P11362	P21860
P12931	P21860
P12931	P29323
P12931	P30530
P12931	P35968
P12931	P41240
P12931	P42679
P12931	P42681
P12931	P42684
P12931	P43405
P12931	P51813
P12931	P54764
P12931	Q01973
P12931	Q04912
P12931	Q05397
P12931	Q06418
P12931	Q07912
P12931	Q08881
P12931	Q14289
P12931	Q16832
P16234	P23458
P16591	P21860
P16591	P23458
P17948	Q14289
P17948	P17948
P17948	P35968
P17948	Q05397
P21709	Q9UM73
P21802	Q14289
P21802	P54764
P21860	Q14289
P21860	P41240
P21860	P52333
P21860	Q08881
P21860	Q13882
P21860	Q15303
P21860	P42681
P21860	P42684
P21860	P43403
P21860	P43405
P21860	Q05397
P21860	P21860
P22455	P22455
P22455	P54764
P22607	Q14289
P22607	P54764
P23458	Q14289
P23458	Q06187
P23458	P52333
P23458	P42680
P23458	P42684
P23458	P43405
P23458	P29597
P29317	Q15375
P29317	Q05397
P29320	Q15375
P29320	P29320
P29322	P29322
P29323	P34925
P29323	P42684
P29323	P29323
P29323	Q05397
P30530	Q07912
P34925	P54753
P34925	P54764
P34925	Q13308
P35590	Q02763
P35590	P35590
P35916	P35968
P35916	P35916
P35916	Q05397
P35968	P35968
P35968	P51813
P36888	P36888
P41240	Q05397
P42679	Q14289
P42680	Q06187
P42680	P42680
P42680	P51813
P42681	P42681
P42684	Q15303
P42685	P42685
P43403	Q14289
P43405	Q14289
P43405	Q06187
P43405	Q15303
P43405	Q05397
P51813	Q06187
P51813	Q08881
P51813	Q05397
P52333	Q14289
P52333	Q9UM73
P52333	P52333
P54753	P54753
P54762	P54762
P54764	P54764
Q04912	Q04912
Q05397	Q14289
Q06187	Q08881
Q06418	Q06418
Q07912	Q9UM73
Q07912	Q12866
Q13882	Q13882
Q15303	Q15303
Q15375	Q15375
Q16288	Q16288
Q16620	Q16620
Q9UF33	Q9UF33
TK	TKL
ID(s) interactor A	ID(s) interactor B
P09619	P10398
P21802	O43318
P00519	Q38SD2
P06213	P04049
P00533	P15056
Q16288	P51617
Q16288	Q9Y616
P42684	Q02779
P06239	P04049
P00533	Q12852
O60674	P04049
P09619	P04049
P21802	Q13546
P06241	P04049
P12931	P04049
P23458	P04049
P29376	P04049
Q05397	Q13546
P00533	Q13546
Q08881	P36897
P16234	P37173
Q06187	P51617
Q12866	Q13873
P29323	Q8IVT5
TKL	TKL
ID(s) interactor A	ID(s) interactor B
Q8NB16	Q9Y572
O00238	P36894
P36894	Q13873
O00238	Q16671
P36897	Q16671
O00238	P36897
O43318	P36897
P36896	P36897
P36897	P37023
P36897	P37173
P36897	Q04771
P36897	Q13705
P36897	Q13873
P36897	Q8NER5
P36897	Q9NYL2
P27037	P36896
P36896	P36896
P36896	Q04771
P36896	Q13705
P36896	Q13873
P36896	Q8NER5
O43187	Q9NWZ3
P51617	Q9NWZ3
Q9NWZ3	Q9Y616
O43187	P10398
P10398	P10398
P10398	P15056
P10398	Q15569
O43318	O43353
O43318	P51617
O43318	Q13546
O43353	Q13546
Q13546	Q9Y572
P27037	P37023
P37023	P37173
P27037	Q04771
Q04771	Q13705
O43187	P51617
O43353	P51617
P51617	Q9Y616
P15056	P53667
P53667	P53671
P53667	Q13873
Q5S007	Q5S007
Q15569	Q15569
P04049	Q6VAB6
O00238	Q13873
P27037	P27037
P27037	Q13705
P04049	P15056
O43187	Q9Y616
P80192	P80192
P04049	Q8IVT5
Q02779	Q5TCX8
Q13705	Q8NER5

## Sheet: Table S4
Supplementary Table S4: Identification of 40 common Kinases
Intergroup (92)	Intragroup(84)	Topological(76)
AGC
P31749	O15530	O15530
O15530	Q05513	Q05513
Q05655	P31749	P31749
Q05513	P17252	Q05655
P17252	P25098	P25098
P17612	Q05655	P17252
P23443	Q02156	Q02156
O00141	O95835	O95835
Q02156	P23443	Q9Y243
P41743	Q13976	P23443
Atypical
P78527	Q15118	P78527
O00418	Q15119	O00418
P11274	P21675	P42345
P42345	P78527	P11274
Q13315	Q13315	Q13315
Q15118	P11274	Q13535
Q13535	Q96QT4	Q15118
Q15119	Q9Y4A5	P21675
P21675	Q13535
Q9Y4A5	Q9BX84
CAMK
Q15831	Q13131	Q15139
Q13131	Q15831	Q8IW41
Q15139	Q96L34	O14757
Q7KZI7	Q7KZI7	Q15831
O14757	Q13555	Q15746
Q96L34	P27448	P54646
Q8IW41	Q13554	Q9BUB5
P27448	Q13557	P49137
P54646	Q9P0L2	O96017
Q15746	P57059	Q96RU7
CK1
Q86Y07	Q99986	Q86Y07
P48729	Q6IQ55	P48729
Q99986	P49674	P48730
P48730	Q5TCY1	Q8IV63
P49674
Q8IV63
Q5TCY1
Q6IQ55
CMGC
P28482	Q00535	P28482
Q16539	P28482	P27361
P27361	Q16539	Q16539
P45983	P68400	P49841
P49841	P24941	P45983
P06493	P50613	P06493
Q00535	P45983	P49840
P68400	P19784	Q00535
P49840	Q00536	P68400
P45984	P11802
Other
O14920	O14920	O15111
O15111	P53350	O14920
P53350	Q14164	Q96RR4
Q14164	O14965	P53350
P19525	P30291	Q9H4A3
P30291	Q86UE8	P19525
Q9H4A3	O15111	P30291
Q9HC98	Q8TF76	Q8N5S9
O14965	Q9NZJ5
Q96RR4	Q9HC98
RGC
P16066		P25092
P20594		P16066
Q02846		Q02846
P25092
STE
Q02750	P45985	Q13153
Q13153	Q99683	Q02750
P45985	Q02750	Q13177
Q13177	P41279	Q99759
O14733	P52564	O14733
Q99683	O14733	P45985
Q13233	Q13233	Q13233
Q99759	Q9Y2U5	Q99683
P52564	P46734
P41279	Q9Y6R4
TK
P12931	P12931	P12931
P00533	P00533	P00533
P06241	P06241	P06241
P00519	O60674	P00519
P07948	P04626	Q06187
Q05397	Q05397	P07948
O60674	P21860
P04626	P00519
P21860	Q14289
P43405	P07948
TKL
P36897	P36897	P36897
P04049	P36896	P36896
O43318	P27037	P27037
P15056	P51617	Q13873
P51617	P10398	P51617
Q13546	Q13705	Q13705
P53667	Q13873	O43187
Q13873	O00238	Q04771
O00238	O43318	O43318
P10398	O43187	P10398
Complete List of 40 Common Kinases
List of 40 Kinases
PDPK1	O15530	AGC		IKKA	O15111	Other
KPCZ	Q05513			IKKB	O14920
AKT1	P31749			PLK1	P53350
KPCD	Q05655			WEE1	P30291
KPCA	P17252			MP2K1	Q02750	STE
KPCE	Q02156			MP2K7	O14733
KS6B1	P23443			MP2K4	P45985
PRKDC	P78527	Atypical		M3K1	Q13233
BCR	P11274			M3K5	Q99683
ATR	Q13535			SRC	P12931	TK
PDK1	Q15118			EGFR	P00533
TAF1	P21675			FYN	P06241
STK11	Q15831	CAMK		ABL1	P00519
VRK2	Q86Y07	CK1		LYN	P07948
MK01	P28482	CMGC		TGFR1	P36897	TKL
MK14	Q16539			BMPR2	Q13873
MK08	P45983			IRAK1	P51617
CDK5	Q00535			M3K8	O43318
GUC2C	P25092	RGC		ARAF	P10398
ANPRA	P16066
GUC2D	Q02846

## Sheet: Table S5
Supplementary Table S5: Identification of the Global Interactome of the Kinome Modulators
Global Interactome of the 5 Kinome Modulators
Kinome Modulators (5 Kinases)	Interactor Uniprot IDs (Total 1203 Interactions)			Unique proteins (963 Proteins)			Unique Kinases interacting with the 5 kinome modulators (127 Kinases)
P12931	Q59EW6			Q59EW6			P00519
P12931	Q8IZP0			Q8IZP0			P42684
P12931	P00519			P00519			P25098
P12931	P42684			P42684			P31749
P12931	Q15027			Q15027			P30530
P12931	P68133			P68133			P11274
P12931	P60709			P60709			P51813
P12931	P12814			P12814			Q00535
P12931	O43184			O43184			P07333
P12931	Q13444			Q13444			P41240
P12931	P07550			P07550			P68400
P12931	P13945			P13945			Q16832
P12931	P25098			P25098			P00533
P12931	Q8N556			Q8N556			P54764
P12931	Q8N4X5			Q8N4X5			P29323
P12931	P35869			P35869			P04626
P12931	O43918			O43918			P21860
P12931	Q9Y2D5			Q9Y2D5			P11362
P12931	Q13023			Q13023			P09769
P12931	P31749			P31749			P06241
P12931	Q96Q35			Q96Q35			P25092
P12931	Q6UB99			Q6UB99			P08069
P12931	P04083			P04083			P06213
P12931	P07355			P07355			Q08881
P12931	Q9BWW9			Q9BWW9			O60674
P12931	P10275			P10275			P35968
P12931	Q07960			Q07960			P10721
P12931	Q68EM7			Q68EM7			Q92918
P12931	A7KAX9			A7KAX9			P28482
P12931	Q9NRY4			Q9NRY4			Q16539
P12931	O14497			O14497			Q8TD08
P12931	P27540			P27540			P45983
P12931	P36575			P36575			P42679
P12931	P49407			P49407			P08581
P12931	P32121			P32121			Q04912
P12931	Q9ULH1			Q9ULH1			Q15746
P12931	O43150			O43150			Q13177
P12931	Q96NS5			Q96NS5			P09619
P12931	Q9ZSY2			Q9ZSY2			O15530
P12931	Q8LBA0			Q8LBA0			P17612
P12931	P05023			P05023			P17252
P12931	P23634			P23634			Q05655
P12931	P30530			P30530			Q02156
P12931	P07140			P07140			P24723
P12931	Q05764			Q05764			P41743
P12931	P25962			P25962			Q05513
P12931	Q80YS6			Q80YS6			Q15139
P12931	P15693			P15693			Q05397
P12931	P17708			P17708			Q14289
P12931	Q8R5G7			Q8R5G7			P04049
P12931	P29066			P29066			P07949
P12931	Q9C8D6			Q9C8D6			Q01973
P12931	Q3EBR4			Q3EBR4			P23443
P12931	Q9FL63			Q9FL63			Q9UBS0
P12931	P30560			P30560			O14920
P12931	P56945			P56945			O15111
P12931	P11274			P11274			P43405
P12931	P51813			P51813			Q07912
P12931	Q63767			Q63767			P42681
P12931	Q86X55			Q86X55			Q06418
P12931	P20810			P20810			P07947
P12931	Q03135			Q03135			Q9UM73
P12931	P51636			P51636			P15056
P12931	P22681			P22681			Q06187
P12931	Q13191			Q13191			P53355
P12931	Q9ULV8			Q9ULV8			Q9Y463
P12931	Q75N03			Q75N03			Q8IVT5
P12931	P78396			P78396			Q6VAB6
P12931	P20248			P20248			P06239
P12931	P24385			P24385			P07948
P12931	Q9Y5K6			Q9Y5K6			Q02750
P12931	P20138			P20138			P36507
P12931	P16671			P16671			Q13233
P12931	P16070			P16070			P27361
P12931	P15529			P15529			P49137
P12931	P13987			P13987			Q8IW41
P12931	P48960			P48960			Q9BUB5
P12931	P30307			P30307			Q9HBH9
P12931	Q16543			Q16543			P51955
P12931	Q9H5V8			Q9H5V8			Q16288
P12931	P12830			P12830			Q13153
P12931	P33151			P33151			Q9H4B4
P12931	Q00535			Q00535			Q15418
P12931	P46527			P46527			Q15349
P12931	P13688			P13688			P51812
P12931	P40198			P40198			O75676
P12931	Q9HCU4			Q9HCU4			P34925
P12931	P23528			P23528			Q9UKE5
P12931	Q14008			Q14008			Q13873
P12931	P78357			P78357			O00418
P12931	P46108			P46108			P51617
P12931	Q14194			Q14194			P45985
P12931	P07333			P07333			O14733
P12931	P41240			P41240			Q9Y2U5
P12931	P68400			P68400			O43318
P12931	P35222			P35222			P45984
P12931	O60716			O60716			P78527
P12931	Q14247			Q14247			Q13546
P12931	Q8IWT3			Q8IWT3			Q86Y07
P12931	Q9M205			Q9M205			P31751
P12931	P78329			P78329			Q8N5S9
P12931	Q02248			Q02248			O14757
P12931	Q9Y4D1			Q9Y4D1			P49840
P12931	O75553			O75553			P49841
P12931	P98082			P98082			Q13418
P12931	Q14118			Q14118			Q99683
P12931	Q9UN19			Q9UN19			P41279
P12931	Q16832			Q16832			P42345
P12931	Q9NQI0			Q9NQI0			Q15119
P12931	P17844			P17844			Q16513
P12931	P23743			P23743			Q04759
P12931	Q13574			Q13574			Q13043
P12931	P78352			P78352			Q96RU7
P12931	O14490			O14490			Q9H4A3
P12931	Q9P1A6			Q9P1A6			Q04771
P12931	O95886			O95886			O14965
P12931	Q9Y2H0			Q9Y2H0			P19525
P12931	Q92988			Q92988			Q9NZJ5
P12931	Q05193			Q05193			Q14164
P12931	P50570			P50570			O43283
P12931	Q14185			Q14185			Q99558
P12931	Q8IZD9			Q8IZD9			Q99759
P12931	Q99704			Q99704			P27448
P12931	O60496			O60496			P53350
P12931	Q8TEW6			Q8TEW6			P05771
P12931	Q9H1R2			Q9H1R2			Q9UHD2
P12931	P25101			P25101			P36897
P12931	P52803			P52803
P12931	P98172			P98172
P12931	P52799			P52799
P12931	O43281			O43281
P12931	P00533			P00533
P12931	Q9GZT9			Q9GZT9
P12931	O15371			O15371
P12931	Q09472			Q09472
P12931	Q9Y2J2			Q9Y2J2
P12931	P54764			P54764
P12931	P29323			P29323
P12931	Q12929			Q12929
P12931	P04626			P04626
P12931	P21860			P21860
P12931	P03372			P03372
P12931	Q92731			Q92731
P12931	P11474			P11474
P12931	P14921			P14921
P12931	P15036			P15036
P12931	Q9UI08			Q9UI08
P12931	B0QYK1			B0QYK1
P12931	O43909			O43909
P12931	P52800			P52800
P12931	P70424			P70424
P12931	O00254			O00254
P12931	O15360			O15360
P12931	O94887			O94887
P12931	P25445			P25445
P12931	P48023			P48023
P12931	P31994			P31994
P12931	P31995			P31995
P12931	P11362			P11362
P12931	P09769			P09769
P12931	P49789			P49789
P12931	P21333			P21333
P12931	Q12778			Q12778
P12931	Q8WU20			Q8WU20
P12931	O15117			O15117
P12931	P06241			P06241
P12931	Q9UQC2			Q9UQC2
P12931	Q8WWW8			Q8WWW8
P12931	Q92947			Q92947
P12931	P14136			P14136
P12931	Q9Y2X7			Q9Y2X7
P12931	P17302			P17302
P12931	P08034			P08034
P12931	Q9SDQ4			Q9SDQ4
P12931	Q9NZM4			Q9NZM4
P12931	P63244			P63244
P12931	P15586			P15586
P12931	P55259			P55259
P12931	Q13322			Q13322
P12931	P62993			P62993
P12931	Q13224			Q13224
P12931	P06396			P06396
P12931	P78347			P78347
P12931	P25092			P25092
P12931	Q9UL51			Q9UL51
P12931	O15379			O15379
P12931	P04439			P04439
P12931	P01889			P01889
P12931	P20823			P20823
P12931	Q14541			Q14541
P12931	P61978			P61978
P12931	P31273			P31273
P12931	P01112			P01112
P12931	P41151			P41151
P12931	P07900			P07900
P12931	P54652			P54652
P12931	P11021			P11021
P12931	P47928			P47928
P12931	P08069			P08069
P12931	Q9Y6K9			Q9Y6K9
P12931	P08887			P08887
P12931	O15357			O15357
P12931	P06213			P06213
P12931	P46940			P46940
P12931	Q9H9L3			Q9H9L3
P12931	Q96J02			Q96J02
P12931	P05106			P05106
P12931	Q08881			Q08881
P12931	P40190			P40190
P12931	O60674			O60674
P12931	P14923			P14923
P12931	P22460			P22460
P12931	Q14721			Q14721
P12931	Q9UK17			Q9UK17
P12931	Q9NR82			Q9NR82
P12931	Q9Y597			Q9Y597
P12931	P35968			P35968
P12931	Q07666			Q07666
P12931	Q92845			Q92845
P12931	P10721			P10721
P12931	P53914			P53914
P12931	P13645			P13645
P12931	P35918			P35918
P12931	Q60749			Q60749
P12931	Q13094			Q13094
P12931	P82730			P82730
P12931	P09848			P09848
P12931	P49916			P49916
P12931	Q8TBB1			Q8TBB1
P12931	Q07954			Q07954
P12931	O70263			O70263
P12931	P21145			P21145
P12931	Q92918			Q92918
P12931	P28482			P28482
P12931	Q16539			Q16539
P12931	Q8TD08			Q8TD08
P12931	P45983			P45983
P12931	Q9UPT6			Q9UPT6
P12931	P10636			P10636
P12931	P42679			P42679
P12931	Q9H204			Q9H204
P12931	Q9NQ76			Q9NQ76
P12931	P08581			P08581
P12931	Q8TDZ2			Q8TDZ2
P12931	P46013			P46013
P12931	P55196			P55196
P12931	O95297			O95297
P12931	Q04912			Q04912
P12931	P03891			P03891
P12931	P15941			P15941
P12931	Q15746			Q15746
P12931	P04370			P04370
P12931	Q14686			Q14686
P12931	Q8GXR9			Q8GXR9
P12931	Q9NV92			Q9NV92
P12931	P25963			P25963
P12931	P43699			P43699
P12931	P30419			P30419
P12931	P35228			P35228
P12931	P29474			P29474
P12931	O60500			O60500
P12931	P55055			P55055
P12931	Q13133			Q13133
P12931	Q96RI1			Q96RI1
P12931	O75469			O75469
P12931	Q14994			Q14994
P12931	P04150			P04150
P12931	O00482			O00482
P12931	O95157			O95157
P12931	Q64627			Q64627
P12931	P20774			P20774
P12931	Q92882			Q92882
P12931	P41231			P41231
P12931	Q13177			Q13177
P12931	Q9LDL7			Q9LDL7
P12931	P23760			P23760
P12931	P23759			P23759
P12931	Q8WUM4			Q8WUM4
P12931	P18545			P18545
P12931	P09619			P09619
P12931	Q13087			Q13087
P12931	O15530			O15530
P12931	P16284			P16284
P12931	Q8IZL8			Q8IZL8
P12931	Q9LV48			Q9LV48
P12931	Q1PEM5			Q1PEM5
P12931	O81765			O81765
P12931	P06401			P06401
P12931	O75167			O75167
P12931	P27986			P27986
P12931	O00459			O00459
P12931	Q92569			Q92569
P12931	P98161			P98161
P12931	P19174			P19174
P12931	Q13393			Q13393
P12931	O14939			O14939
P12931	O15162			O15162
P12931	P28340			P28340
P12931	Q07869			Q07869
P12931	Q03181			Q03181
P12931	Q86YN6			Q86YN6
P12931	Q9Y5P8			Q9Y5P8
P12931	Q15257			Q15257
P12931	Q13029			Q13029
P12931	O43900			O43900
P12931	P17612			P17612
P12931	P17252			P17252
P12931	Q05655			Q05655
P12931	Q02156			Q02156
P12931	P24723			P24723
P12931	P41743			P41743
P12931	Q05513			Q05513
P12931	Q15139			Q15139
P12931	P28065			P28065
P12931	Q05397			Q05397
P12931	Q14289			Q14289
P12931	P18031			P18031
P12931	Q06124			Q06124
P12931	Q99952			Q99952
P12931	P17706			P17706
P12931	Q16825			Q16825
P12931	P29350			P29350
P12931	P18433			P18433
P12931	P23469			P23469
P12931	P49023			P49023
P12931	P34152			P34152
P12931	P18052			P18052
P12931	Q9H2M9			Q9H2M9
P12931	P04049			P04049
P12931	Q86X10			Q86X10
P12931	Q13905			Q13905
P12931	P10276			P10276
P12931	P10826			P10826
P12931	P13631			P13631
P12931	P20936			P20936
P12931	Q7Z6E9			Q7Z6E9
P12931	P07949			P07949
P12931	O15492			O15492
P12931	Q8TB24			Q8TB24
P12931	Q01973			Q01973
P12931	Q92753			Q92753
P12931	P27635			P27635
P12931	P26373			P26373
P12931	Q8LEM8			Q8LEM8
P12931	P78345			P78345
P12931	P23443			P23443
P12931	Q9UBS0			Q9UBS0
P12931	P10301			P10301
P12931	Q9NQC3			Q9NQC3
P12931	P19793			P19793
P12931	P28702			P28702
P12931	Q9NSC2			Q9NSC2
P12931	Q15858			Q15858
P12931	O00560			O00560
P12931	Q9NZV5			Q9NZV5
P12931	Q8N5H7			Q8N5H7
P12931	Q9Y3L3			Q9Y3L3
P12931	Q96B97			Q96B97
P12931	Q5TCZ1			Q5TCZ1
P12931	Q9UPX8			Q9UPX8
P12931	Q9BYB0			Q9BYB0
P12931	Q15464			Q15464
P12931	P29353			P29353
P12931	Q13796			Q13796
P12931	Q86WV1			Q86WV1
P12931	Q9UBY0			Q9UBY0
P12931	P84022			P84022
P12931	Q12824			Q12824
P12931	Q92922			Q92922
P12931	Q969G3			Q969G3
P12931	Q13573			Q13573
P12931	Q15036			Q15036
P12931	O60493			O60493
P12931	Q9BX66			Q9BX66
P12931	Q07889			Q07889
P12931	Q07890			Q07890
P12931	P08047			P08047
P12931	P35326			P35326
P12931	Q13813			Q13813
P12931	O14920			O14920
P12931	O15111			O15111
P12931	Q9C0H9			Q9C0H9
P12931	P11831			P11831
P12931	Q9UGK3			Q9UGK3
P12931	P42224			P42224
P12931	P40763			P40763
P12931	P42229			P42229
P12931	P51692			P51692
P12931	P42226			P42226
P12931	Q9UNE7			Q9UNE7
P12931	P43405			P43405
P12931	P17600			P17600
P12931	Q9HCH5			Q9HCH5
P12931	Q9QWI6			Q9QWI6
P12931	P42227			P42227
P12931	P15884			P15884
P12931	O14746			O14746
P12931	P04155			P04155
P12931	P21980			P21980
P12931	P10827			P10827
P12931	P10828			P10828
P12931	Q13009			Q13009
P12931	O15455			O15455
P12931	O00206			O00206
P12931	Q9NR96			Q9NR96
P12931	Q9Y6Q6			Q9Y6Q6
P12931	P19438			P19438
P12931	O14788			O14788
P12931	Q07912			Q07912
P12931	Q68CZ2			Q68CZ2
P12931	Q13077			Q13077
P12931	Q13114			Q13114
P12931	Q9Y4K3			Q9Y4K3
P12931	Q6PIZ9			Q6PIZ9
P12931	Q15642			Q15642
P12931	Q15643			Q15643
P12931	Q15650			Q15650
P12931	Q15654			Q15654
P12931	Q9Y210			Q9Y210
P12931	Q9HBA0			Q9HBA0
P12931	P50607			P50607
P12931	Q9NRJ4			Q9NRJ4
P12931	P42681			P42681
P12931	Q06418			Q06418
P12931	P0CG48			P0CG48
P12931	O95071			O95071
P12931	P47192			P47192
P12931	P18206			P18206
P12931	P55072			P55072
P12931	P11473			P11473
P12931	P09327			P09327
P12931	P42768			P42768
P12931	Q9Y2W2			Q9Y2W2
P12931	O75717			O75717
P12931	P19544			P19544
P12931	Q9NZC7			Q9NZC7
P12931	P07947			P07947
P12931	Q96MU7			Q96MU7
P12931	P31946			P31946
P12931	P62258			P62258
P12931	P61981			P61981
P12931	Q04917			Q04917
P12931	Q4V348			Q4V348
P12931	Q05996			Q05996
P12931	Q90VU7			Q90VU7
P28482	P78536			P78536
P28482	P07550			P30556
P28482	P30556			Q9UM73
P28482	P31749			Q9BRR9
P28482	Q9UM73			Q92974
P28482	P10275			P15336
P28482	Q9BRR9			P30518
P28482	Q92974			P29067
P28482	P49407			Q9C9F5
P28482	P32121			O04312
P28482	P15336			P10415
P28482	P05023			P41182
P28482	P30518			Q8WV28
P28482	P15693			P53004
P28482	P29067			P15056
P28482	Q9C9F5			Q06187
P28482	Q3EBR4			Q07021
P28482	O04312			P27708
P28482	P10415			Q9P1Z2
P28482	P41182			Q14790
P28482	Q8WV28			P55211
P28482	P53004			P15391
P28482	P15056			Q9H211
P28482	Q06187			Q99626
P28482	Q07021			P17676
P28482	P27708			Q02224
P28482	Q9P1Z2			Q53EZ4
P28482	Q14790			P33076
P28482	P55211			Q96MX0
P28482	Q03135			P02741
P28482	P24385			P16989
P28482	P15391			P07339
P28482	P30307			P53355
P28482	Q00535			P43146
P28482	Q9H211			Q8W4G3
P28482	Q99626			P28562
P28482	P17676			Q9BY84
P28482	Q02224			Q05923
P28482	Q53EZ4			Q9NRW4
P28482	P33076			P51452
P28482	Q96MX0			Q13115
P28482	P02741			Q16690
P28482	P16989			Q16828
P28482	P07339			Q16829
P28482	P53355			Q99956
P28482	P43146			Q9Y463
P28482	Q8W4G3			P31016
P28482	P28562			Q7TNL7
P28482	Q9BY84			Q9H6Z9
P28482	Q05923			Q13541
P28482	Q9NRW4			P19419
P28482	P51452			Q8N8S7
P28482	Q13115			P19235
P28482	Q16690			P50548
P28482	Q16828			Q8NEM7
P28482	Q16829			Q14192
P28482	Q99956			Q13643
P28482	Q9Y463			P01100
P28482	P31016			O43559
P28482	Q7TNL7			Q13480
P28482	P00533			P24046
P28482	Q9H6Z9			P04406
P28482	Q13541			P15976
P28482	P19419			P23769
P28482	Q8N8S7			P43694
P28482	Q09472			P60983
P28482	P19235			Q3T906
P28482	P50548			Q9H8Y8
P28482	P03372			P30710
P28482	P14921			P56524
P28482	Q8NEM7			P04908
P28482	P31994			P62805
P28482	Q14192			P30480
P28482	Q13643			Q9ULV5
P28482	P01100			Q9LV52
P28482	Q8WU20			Q02363
P28482	O43559			P46695
P28482	Q13480			P80217
P28482	Q9UQC2			P17181
P28482	P24046			P35568
P28482	P04406			P06756
P28482	P15976			P18564
P28482	P23769			P21743
P28482	P43694			P17535
P28482	P17302			Q15004
P28482	P60983			O14901
P28482	Q3T906			Q04695
P28482	Q9H8Y8			P05787
P28482	Q13322			Q8IVT5
P28482	P62993			Q6VAB6
P28482	P30710			Q61097
P28482	P56524			Q9UHA4
P28482	P04908			P06239
P28482	P62805			P42702
P28482	P30480			Q05469
P28482	Q9ULV5			P30533
P28482	Q9LV52			P07948
P28482	P07900			Q8NHW3
P28482	Q02363			Q02750
P28482	P46695			P36507
P28482	P80217			Q13233
P28482	P17181			P27361
P28482	P46940			P49137
P28482	P35568			Q8IW41
P28482	P06756			P02686
P28482	P18564			Q07820
P28482	P21743			P50579
P28482	P17535			Q5TGZ0
P28482	Q07666			O75030
P28482	Q15004			Q9BUB5
P28482	O14901			Q9HBH9
P28482	Q04695			Q9H2K0
P28482	P05787			P58546
P28482	Q8IVT5			P10242
P28482	Q6VAB6			P01106
P28482	Q61097			P23226
P28482	Q9UHA4			Q15788
P28482	P06239			Q9Y6Q9
P28482	P42702			Q9NXR1
P28482	Q05469			P12036
P28482	P30533			P07197
P28482	P07948			P51955
P28482	Q8NHW3			P08138
P28482	Q02750			P22736
P28482	P36507			Q13285
P28482	Q13233			Q16288
P28482	P28482			P49790
P28482	Q16539			Q80Z64
P28482	P27361			P63140
P28482	P45983			Q9UKS6
P28482	P49137			Q13153
P28482	Q8IW41			Q15121
P28482	P10636			P30086
P28482	P02686			P00750
P28482	Q07820			Q9NQ66
P28482	P50579			Q9H4B4
P28482	Q5TGZ0			P37231
P28482	O75030			P62136
P28482	Q9BUB5			P36873
P28482	Q9HBH9			Q96SB3
P28482	Q9H2K0			P67775
P28482	P58546			Q13362
P28482	P10242			Q14558
P28482	P01106			P54829
P28482	P23226			P35236
P28482	Q15788			Q9HD43
P28482	Q9Y6Q9			Q15256
P28482	Q9NXR1			Q9UJ41
P28482	P12036			P06400
P28482	P07197			P49795
P28482	P51955			Q15418
P28482	P08138			Q15349
P28482	P43699			P51812
P28482	P04150			O75676
P28482	P22736			P34925
P28482	Q13285			P18654
P28482	Q16288			Q8BSK8
P28482	P49790			P51170
P28482	Q80Z64			Q14160
P28482	P63140			P82636
P28482	Q9UKS6			P23246
P28482	Q13153			P19634
P28482	Q13177			Q15797
P28482	Q15121			Q15796
P28482	P30086			Q13485
P28482	P16284			P37840
P28482	P06401			O76070
P28482	P00750			O60504
P28482	Q9NQ66			O43597
P28482	Q9H4B4			P36956
P28482	Q07869			Q12772
P28482	P37231			P11384
P28482	P62136			P15923
P28482	P36873			Q12800
P28482	Q96SB3			Q15583
P28482	P67775			P07101
P28482	Q13362			Q93038
P28482	Q05655			Q9UKE5
P28482	Q02156			Q15025
P28482	Q05513			Q8NFZ5
P28482	Q14558			Q9H2K2
P28482	P18031			P50616
P28482	P54829			P11388
P28482	P35236			P12270
P28482	P23469			P49815
P28482	Q9HD43			P15348
P28482	Q15256			Q01320
P28482	P49023			P17480
P28482	Q9UJ41			P15498
P28482	P04049			P19320
P28482	P10276			P21796
P28482	P06400			P67809
P28482	P07949			P26651
P28482	P49795			P05412
P28482	Q8LEM8			Q9U1H0
P28482	Q15418			P04637
P28482	Q15349			P22807
P28482	P51812			P52565
P28482	O75676			P22282
P28482	P23443			P12023
P28482	P19793			Q9C971
P28482	P34925			Q92934
P28482	P18654			Q07817
P28482	Q8BSK8			O43521
P28482	Q9NSC2			Q96LC9
P28482	P51170			Q13873
P28482	Q14160			Q6ZUT1
P28482	P82636			P49913
P28482	P23246			Q9P219
P28482	Q8N5H7			P38936
P28482	Q9BYB0			P49715
P28482	P29353			P61201
P28482	P19634			P46109
P28482	Q15797			P05541
P28482	Q15796			Q9Y6W6
P28482	P84022			Q13202
P28482	Q13485			Q99N11
P28482	P37840			O00418
P28482	O76070			P41970
P28482	O60504			P15311
P28482	Q07889			Q13158
P28482	P08047			Q96PV7
P28482	O43597			O75369
P28482	P36956			Q9UM11
P28482	Q12772			Q14697
P28482	P40763			P41250
P28482	P42229			Q06210
P28482	P51692			P09211
P28482	P11384			Q02108
P28482	P15923			P16104
P28482	Q12800			Q13547
P28482	Q15583			Q9UKV0
P28482	P07101			P15822
P28482	P19438			P51659
P28482	Q93038			Q00613
P28482	O14788			P11142
P28482	Q9UKE5			O95163
P28482	Q15025			Q6UWB1
P28482	Q8NFZ5			P51617
P28482	Q9H2K2			Q8WYK2
P28482	P50616			Q9P055
P28482	P11388			P17275
P28482	P12270			P05627
P28482	P49815			P46821
P28482	P15348			P45985
P28482	Q01320			O14733
P28482	P0CG48			Q9Y2U5
P28482	O95071			O43318
P28482	P17480			Q9UQF2
P28482	P15498			Q13387
P28482	P19320			P45984
P28482	P21796			O60336
P28482	P11473			Q9LQQ9
P28482	P67809			P26038
P28482	P26651			Q9R237
P28482	P05412			Q9WVI9
P28482	Q9U1H0			P35240
P28482	P04637			Q13469
P28482	P22807			Q16621
P45983	P52565			Q02962
P45983	P15336			P24102
P45983	P22282			O75928
P45983	P12023			Q12796
P45983	Q9C971			P78527
P45983	Q92934			Q9NS91
P45983	P56945			Q9NS23
P45983	P10415			Q96T37
P45983	Q07817			Q04864
P45983	O43521			Q8W4E1
P45983	Q96LC9			P61586
P45983	Q13873			Q13546
P45983	Q6ZUT1			P05387
P45983	P49913			P57086
P45983	P22681			Q9UIL1
P45983	Q9P219			Q9BRG2
P45983	P38936			O60239
P45983	Q9H211			Q7Z6J0
P45983	P49715			Q96EB6
P45983	P61201			O60271
P45983	P46108			Q01892
P45983	P46109			Q9NP77
P45983	P05541			Q15750
P45983	P28562			O14763
P45983	Q9Y6W6			O15350
P45983	Q9BY84			Q12933
P45983	Q9NRW4			P02340
P45983	Q13115			Q86Y07
P45983	Q16829			P12956
P45983	Q13202			P63104
P45983	Q99N11			Q9P2Y4
P45983	Q7TNL7			P34685
P45983	O00418			Q9TIH2
P45983	P19419			Q09666
P45983	P41970			P02765
P45983	P15311			Q96B36
P45983	Q13158			P31751
P45983	Q96PV7			Q9H8T0
P45983	P25445			Q86V81
P45983	P48023			Q06481
P45983	O75369			P02749
P45983	Q9UM11			Q9UKG1
P45983	Q14697			Q8IXJ9
P45983	P41250			P54253
P45983	Q06210			O95999
P45983	P09211			P07738
P45983	Q02108			P38398
P45983	P16104			Q8N5S9
P45983	Q13547			P42574
P45983	Q9UKV0			Q3V6T2
P45983	P15822			O14757
P45983	P01112			Q8N668
P45983	P51659			P16220
P45983	Q00613			Q96QB1
P45983	Q9ULV5			P25685
P45983	P11142			O14641
P45983	Q02363			Q92556
P45983	O95163			Q15910
P45983	Q6UWB1			O43524
P45983	P51617			P98177
P45983	P35568			P49840
P45983	Q96J02			P49841
P45983	Q8WYK2			Q16778
P45983	Q9P055			P09601
P45983	P17275			P08238
P45983	P17535			P38646
P45983	P05627			P42858
P45983	Q04695			P06762
P45983	P05787			Q13418
P45983	P46821			P12268
P45983	P45985			Q14643
P45983	O14733			P29994
P45983	Q13233			Q92831
P45983	Q9Y2U5			Q92945
P45983	Q16539			Q16584
P45983	P27361			Q99683
P45983	P31749			P41279
P45983	O43318			Q00987
P45983	Q9UQF2			O15151
P45983	Q13387			Q9UBP6
P45983	Q9UPT6			Q01362
P45983	P45984			P56278
P45983	O60336			P42345
P45983	Q9HBH9			Q05195
P45983	Q9LQQ9			P14598
P45983	P26038			Q13772
P45983	P01106			Q13370
P45983	P23226			Q15119
P45983	Q9R237			Q96S96
P45983	Q9WVI9			O60825
P45983	P35240			Q99623
P45983	Q13469			Q8TCG2
P45983	Q16621			Q16513
P45983	P04150			Q9UIW2
P45983	Q64627			O60437
P45983	Q02962			P35813
P45983	P24102			P30153
P45983	O75928			P13727
P45983	P27986			Q04759
P45983	Q12796			P60484
P45983	P37231			O95716
P45983	Q15139			P63000
P45983	P78527			Q8TAI7
P45983	P49023			P62979
P45983	Q9NS91			Q13950
P45983	P04049			P62830
P45983	Q9NS23			P21453
P45983	Q96T37			Q9NUC0
P45983	Q04864			Q15047
P45983	P07949			P31947
P45983	Q8W4E1			O14492
P45983	P61586			O15105
P45983	Q13546			O94875
P45983	P05387			Q13043
P45983	P23443			A7DTG3
P45983	Q8BSK8			P56279
P45983	P57086			O95988
P45983	Q9UIL1			P56846
P45983	Q9BRG2			Q5T1C6
P45983	O60239			Q92547
P45983	Q7Z6J0			A0AV47
P45983	P29353			P07951
P45983	Q96EB6			P67936
P45983	Q15796			Q9UKU6
P45983	P84022			Q96RU7
P45983	P37840			Q92574
P45983	O76070			P68371
P45983	O60271			Q8NBZ7
P45983	Q01892			P15692
P45983	Q9NP77			P08670
P45983	P40763			Q9H4A3
P45983	Q15750			P98170
P45983	Q12800			P46937
P45983	O14763			P63261
P45983	P19438			Q04771
P45983	O14788			O14965
P45983	O15350			P0C7R4
P45983	Q12933			P18596
P45983	Q9Y4K3			Q7Z569
P45983	P02340			Q9Y297
P45983	P0CG48			P62158
P45983	Q86Y07			O15446
P45983	Q9NZC7			O60508
P45983	P12956			O15519
P45983	P63104			Q00610
P45983	Q9P2Y4			Q02246
P45983	P05412			Q9BT78
P45983	P34685			Q92905
P45983	P04637			Q9UBW8
P45983	Q9TIH2			Q92793
P31749	P60709			P15509
P31749	Q09666			B0UXA9
P31749	P02765			Q9H467
P31749	O14920			Q13616
P31749	O15111			Q13618
P31749	Q96B36			P30551
P31749	P31751			Q60680
P31749	Q9H8T0			P19525
P31749	Q86V81			Q9NZJ5
P31749	Q06481			P07814
P31749	P02749			Q8IUD2
P31749	Q9UKG1			P22087
P31749	P10275			Q9UKB1
P31749	Q8IXJ9			Q969H0
P31749	P54253			Q02790
P31749	P29067			Q13451
P31749	Q92934			Q96RR5
P31749	O95999			Q00839
P31749	O43521			Q9NSC5
P31749	P07738			Q9UQC1
P31749	P15056			P34931
P31749	P38398			Q14164
P31749	Q8N5S9			Q13576
P31749	P42574			Q14653
P31749	P55211			Q7TSS3
P31749	Q3V6T2			O88522
P31749	Q16543			Q14145
P31749	P38936			Q8N163
P31749	P46527			P52292
P31749	O14757			P42704
P31749	Q8N668			P61626
P31749	P16220			O43283
P31749	P17844			Q99558
P31749	Q96QB1			Q99759
P31749	P25685			P27448
P31749	Q14185			Q7Z434
P31749	O14641			P23508
P31749	Q13541			P46199
P31749	Q92556			Q99836
P31749	Q09472			P35580
P31749	P03372			Q62625
P31749	Q92731			Q15596
P31749	Q15910			Q96PU5
P31749	O15360			Q15843
P31749	Q12778			P19838
P31749	O43524			Q00653
P31749	P98177			D3DR86
P31749	Q9UQC2			Q15653
P31749	P15976			Q86WI3
P31749	P23769			Q9NX02
P31749	Q13322			Q86UT6
P31749	P49840			P49116
P31749	P49841			P13084
P31749	Q16778			P09874
P31749	P09601			Q16342
P31749	P07900			Q96FA3
P31749	P08238			P53350
P31749	P38646			O95602
P31749	P42858			Q9H9Y6
P31749	P06762			Q9Y2S0
P31749	Q9Y6K9			Q9GZS1
P31749	Q13418			P52434
P31749	P12268			P62875
P31749	P51617			O75688
P31749	P35568			O75807
P31749	P05106			Q969Q6
P31749	Q14643			P30048
P31749	P29994			P05771
P31749	Q92831			P06737
P31749	Q92945			P31044
P31749	P13645			Q9UJF2
P31749	P45985			Q04206
P31749	Q16584			O22795
P31749	Q99683			P62888
P31749	P41279			P36578
P31749	Q16539			Q02878
P31749	Q9UQF2			P62917
P31749	P49137			P62280
P31749	P10636			P62277
P31749	P02686			P23396
P31749	Q00987			O15027
P31749	O15151			P63208
P31749	Q9UBP6			Q13501
P31749	Q01362			O09044
P31749	Q04912			Q92844
P31749	P56278			Q9UHD2
P31749	P42345			Q92754
P31749	Q05195			P36897
P31749	P14598			Q3ZCQ8
P31749	Q13772			P01375
P31749	P29474			P21580
P31749	P04150			Q9H3D4
P31749	P22736			Q9ULW0
P31749	Q13153			Q15628
P31749	Q13370			O43734
P31749	Q15119			P19474
P31749	O15530			P14373
P31749	Q15121			Q6P9F5
P31749	Q96S96			Q8TEL6
P31749	O60825			Q13748
P31749	Q99623			P07437
P31749	Q8TCG2			Q9BVA1
P31749	P27986			P04350
P31749	Q16513			P62988
P31749	P19174			Q13107
P31749	Q9UIW2			Q93008
P31749	Q86YN6			Q5D1E8
P31749	O60437			Q5D1E7
P31749	P35813			P17644
P31749	P67775
P31749	P30153
P31749	P13727
P31749	Q04759
P31749	Q05513
P31749	P78527
P31749	P60484
P31749	P18031
P31749	O95716
P31749	P63000
P31749	P04049
P31749	Q8TAI7
P31749	P62979
P31749	P23443
P31749	Q13950
P31749	P62830
P31749	P21453
P31749	Q9NUC0
P31749	Q15047
P31749	P31947
P31749	O14492
P31749	Q7Z6J0
P31749	Q96EB6
P31749	Q15796
P31749	P84022
P31749	Q13485
P31749	O15105
P31749	O94875
P31749	P42224
P31749	Q13043
P31749	Q9UNE7
P31749	A7DTG3
P31749	P56279
P31749	O95988
P31749	P56846
P31749	O14746
P31749	Q5T1C6
P31749	O14788
P31749	Q92547
P31749	A0AV47
P31749	P07951
P31749	P67936
P31749	Q9UKU6
P31749	Q96RU7
P31749	Q92574
P31749	P49815
P31749	P68371
P31749	Q8NBZ7
P31749	P15692
P31749	P08670
P31749	Q9H4A3
P31749	P98170
P31749	P46937
P31749	P67809
P31749	P63104
O14920	P63261
O14920	Q04771
O14920	P49407
O14920	P32121
O14920	O14965
O14920	P0C7R4
O14920	P18596
O14920	O95999
O14920	Q7Z569
O14920	Q9Y297
O14920	Q07021
O14920	P62158
O14920	Q14790
O14920	O15446
O14920	Q16543
O14920	O60508
O14920	O15519
O14920	O15111
O14920	Q00610
O14920	Q02246
O14920	Q9BT78
O14920	Q92905
O14920	Q9UBW8
O14920	Q92793
O14920	P15509
O14920	B0UXA9
O14920	P35222
O14920	Q9H467
O14920	Q13616
O14920	Q13618
O14920	P30551
O14920	Q60680
O14920	P28562
O14920	Q9H6Z9
O14920	P19525
O14920	Q9NZJ5
O14920	P07814
O14920	Q8IUD2
O14920	O15360
O14920	P22087
O14920	Q9UKB1
O14920	Q969H0
O14920	Q02790
O14920	Q13451
O14920	P21333
O14920	O43524
O14920	Q96RR5
O14920	Q00839
O14920	Q9NSC5
O14920	Q9UQC1
O14920	P07900
O14920	P08238
O14920	P34931
O14920	P11021
O14920	P11142
O14920	P38646
O14920	P42858
O14920	O95163
O14920	Q14164
O14920	Q9Y6K9
O14920	P46940
O14920	Q13576
O14920	P51617
O14920	Q14653
O14920	P35568
O14920	Q7TSS3
O14920	O88522
O14920	Q14145
O14920	Q8N163
O14920	P52292
O14920	Q04695
O14920	P42704
O14920	P61626
O14920	Q13233
O14920	Q16584
O14920	O43283
O14920	Q99558
O14920	Q99759
O14920	O43318
O14920	Q16539
O14920	P27448
O14920	Q7Z434
O14920	P23508
O14920	P46199
O14920	P15941
O14920	Q99836
O14920	P35580
O14920	Q62625
O14920	P23226
O14920	Q15596
O14920	Q9Y6Q9
O14920	Q96PU5
O14920	Q15843
O14920	P19838
O14920	Q00653
O14920	D3DR86
O14920	P25963
O14920	Q15653
O14920	Q86WI3
O14920	Q9NX02
O14920	Q86UT6
O14920	P49116
O14920	P13084
O14920	P09874
O14920	Q16342
O14920	P30086
O14920	Q96FA3
O14920	P53350
O14920	O95602
O14920	Q9H9Y6
O14920	Q9Y2S0
O14920	Q9GZS1
O14920	P52434
O14920	P62875
O14920	O75688
O14920	P62136
O14920	O75807
O14920	Q969Q6
O14920	P30048
O14920	P17252
O14920	P05771
O14920	Q05655
O14920	P41743
O14920	Q04759
O14920	Q05513
O14920	P78527
O14920	P06737
O14920	P31044
O14920	Q9UJF2
O14920	Q04864
O14920	Q04206
O14920	Q13546
O14920	O22795
O14920	P62888
O14920	P36578
O14920	Q02878
O14920	P62917
O14920	P62280
O14920	P62277
O14920	P23396
O14920	O15027
O14920	P63208
O14920	Q92922
O14920	Q13501
O14920	Q9UGK3
O14920	P40763
O14920	O09044
O14920	Q92844
O14920	Q9UHD2
O14920	Q92754
O14920	P36897
O14920	Q3ZCQ8
O14920	P01375
O14920	P21580
O14920	P19438
O14920	Q8NFZ5
O14920	Q9H3D4
O14920	Q9ULW0
O14920	Q15628
O14920	Q12933
O14920	O43734
O14920	Q9Y4K3
O14920	P19474
O14920	P14373
O14920	Q6P9F5
O14920	Q8TEL6
O14920	Q92574
O14920	Q13748
O14920	P07437
O14920	Q9BVA1
O14920	P04350
O14920	P62988
O14920	P0CG48
O14920	Q13107
O14920	Q93008
O14920	P21796
O14920	P31946
O14920	Q5D1E8
O14920	Q5D1E7
O14920	P05412
O14920	P17644
O14920	P04637

## Sheet: Table S6
Supplementary Table S6: Disease Enrichment of the primary interactome of the 5 kinome modulators reveal cancer as the most enriched disease
© 2000-2013 Ingenuity Systems, Inc. All rights reserved.
Category	p-value	Molecules
Cancer	1.19E-80-4.12E-24	EVL,NPM1,TGFBR1,PIK3R1,SOS2,MLLT4,GSK3A,DAB1,LCK,GORASP2,TSC2,WWOX,SMARCB1,ETS1,SMAD2,PDIA2,RGS19,AKT2,DAPK1,YWHAG,ANXA2,NFKB2,TCF3,CNTN2,CDH5,RAD18,PRKACA,RPS6KA1,DOK1,THRB,FLNB,TSC1,ILK,TUBB2B,TCL1B,IQGAP2,TRHDE,ARRB1,PNRC1,MXD1,IL27RA,TNFSF11,CCKAR,KHDRBS1,TUBB4B,SALL1,NR4A1,LYN,SFN,RYK,PPARA,FOXO4,YWHAH,SMAD3,GATA2,PTEN,PGR,CTSD,DDX5,HSF4,MUC21,MAPK3,JUND,MT-ND2,CEACAM1,ITK,MAP3K14,TIAM1,EWSR…
Hematological Disease	1.19E-80-1.67E-24	NPM1,MYH10,RAPGEF1,PIK3R1,CCND1,RB1,LCK,PRDM2,NR1I2,WWOX,SMARCB1,CAV1,TP53,ETS1,PDIA2,WT1,AKT2,PRKCQ,TNFRSF10B,ANXA2,STAT3,NFKB2,TCF3,TLR9,MAPK8IP1,SYK,DUSP4,DOK1,CFLAR,RXRA,ESR2,TNF,JAK2,TUBB2B,KSR1,CD33,TCL1B,DUSP5,YES1,PNRC1,TUBB4A,IL27RA,TLR3,CASP8,PRKDC,RPL4,FHIT,TNFSF11,GRB2,TUBB4B,MYD88,RGS16,VIM,BCL10,NTRK3,CDKN1A,SH2B2,LYN,ARHGDIA,MAP3K8,ID4,TRAF3,BAD,CDCP1,GNB2L1,PDPK1,GATA2,RARG,PTEN,M…
Inflammatory Response	4.55E-60-2.58E-24	NPM1,MYH10,TGFBR1,PIK3R1,SLC9A1,CCND1,ADRB3,LCK,FHL2,NR1I2,SRCIN1,CAV1,IGFBP1,ETS1,TP53,WT1,SMAD2,AKT2,PRKCQ,ADD2,CRKL,HSF1,TNFRSF10B,ANXA2,TBK1,STAT3,NFKB2,TCF3,TLR9,KRT10,PLD1,ATF2,MET,NCF1,CDH1,SYK,DOK1,RXRA,ITGB6,TNF,ESR2,TSC1,PTPN2,NR1H4,GAPDH,EPHA4,JAK2,SCT,FCGR2B,DUSP2,TUBB2B,KSR1,TGM2,AR,ARRB1,SORBS1,NGFR,TUBB4A,TLR3,IL27RA,VDR,CASP8,TNFSF11,PAK2,GRB2,TNFRSF1A,MYD88,TUBB4B,KRT17,VIM,FOS,C…
Infectious Disease	5.33E-53-1.99E-25	RAF1,RAPGEF1,TGFBR1,PIK3R1,PKN2,LCK,PRDM2,SMARCB1,CAV1,CDC40,DNM2,TP53,FBL,PDIA2,SMAD2,TRIM21,HSF1,TBK1,ANXA2,STAT3,TLR9,TCF3,PLD1,ATF2,NCF1,PRKACA,RXRA,TNF,DLGAP1,GAPDH,JAK2,MED28,FCGR2B,AR,ARRB1,HSP90AB1,CALCOCO1,PNRC1,NGFR,FBXW11,MXD1,TUBB4A,PIK3R2,TLR3,CSNK2B,VDR,PDCD6IP,PAK2,HNRNPU,KHDRBS1,TNFRSF1A,MYD88,TUBB4B,GRB2,POLR1E,CRMP1,CAMP,SFN,PPARA,GRIN2A,TRAF3,MAP3K11,SMAD3,HSPA5,RARG,PGR,MYC,DD…
Developmental Disorder	2.53E-51-1.31E-25	RAF1,MYH10,ZC3H12A,TGFBR1,PIK3R1,SLC9A1,CCND1,RB1,LCK,FHL2,TSC2,WWOX,CAV1,TP53,ETS1,WT1,SMAD2,AKT2,YAP1,HSF1,STAT3,NFKB2,KRT10,TCF3,MAPK8IP1,ATF2,MET,NCF1,CDH5,PRKACA,CFLAR,RXRA,THRB,TNF,ESR2,FLNB,TSC1,PDCD2,GUCY2C,PTPN2,JAK2,ARRB1,AR,NGFR,VDR,TLR3,RPS6KA2,CSNK2B,LIG3,PRKDC,CCKAR,TNFSF11,PAK2,GRB2,SALL1,ABI1,CDKN1A,LYN,ARHGDIA,PPARA,TRAF3,SMAD3,PDPK1,RARG,PTEN,PGR,MYC,CTSD,STK4,RUNX2,MAPK3,PAX2,C…
Cardiovascular Disease	3.11E-49-1.31E-25	RAF1,MYH10,TGFBR1,PIK3R1,GSK3A,SLC9A1,ADRB3,FHL2,TSC2,WWOX,CAV1,PRKD1,TP53,SMAD2,RGS19,PRKCQ,TRIM21,YAP1,CRKL,ANXA2,STAT3,TLR9,MAPK8IP1,NCF1,SYK,CFLAR,CHRNA2,THRB,RXRA,ESR2,TNF,TSC1,F2RL2,GUCY2C,NR1H4,ILK,JAK2,FCGR2B,TGM2,AR,SORBS1,NGFR,SOS1,TUBB4A,VDR,CASP8,LIG3,TNFSF11,MYD88,GRB2,TNFRSF1A,TUBB4B,VIM,FOS,NTRK3,CDKN1A,NR4A1,PPARA,GRIN2A,CDCP1,SMAD3,PDPK1,RARG,PTEN,CTSD,STK4,RUNX2,MAPK3,JUND,CAST,…
Respiratory Disease	4.33E-44-1.85E-33	RAF1,COPS2,TGFBR1,PLK3,NF2,HRAS,RPS11,VEGFA,RB1,LCK,PRDM2,NR1I2,RARA,EZR,KEAP1,WWOX,TSC2,CAV1,FASLG,AHR,PDGFRB,TP53,WT1,STAT6,AKT2,CREBBP,ANXA2,STAT3,KRT10,MET,CDH1,DOK1,THRB,RXRA,ESR2,TNF,GSTP1,ALK,TSC1,ADAM17,ZFP36,HLA-A,DUSP6,JAK2,MED28,EP300,MTOR,AR,JUN,AKT1,TRHDE,HSP90AB1,NCOA2,KCNA5,RARB,TOP2A,IGF1R,CEBPA,PRKCE,TUBB4A,CTNNB1,CASP8,RXRB,EGFR,PSMB9,FHIT,IMPDH2,TUBB4B,AHSG,VIM,PLK1,MDM2,FADD,T…
Reproductive System Disease	6.21E-36-4.12E-24	RAF1,COPS2,TGFBR1,PPP2CA,PIK3R1,ATXN1,HRAS,CCND1,VEGFA,RB1,LCK,PAK1,FHL2,CCNA1,NR1I2,SMARCB1,TSC2,CAV1,AFAP1,IGFBP1,PDGFRB,MCL1,KCNQ5,TP53,WT1,STAT5A,AKT2,PRKCQ,RRAS,GPX5,ANXA2,JUNB,IER3,STAT3,MET,CDH1,H2AFX,DUSP4,VAV1,PTPRA,ESR2,TNF,GSTP1,ALK,TSC1,FYN,ADAM17,ZFP36,KPNA2,GAPDH,ILK,BMPR2,EPHA4,PRKCZ,DUSP2,TUBB2B,EIF4EBP1,EP300,TGM2,EFNB2,TRADD,YES1,LYZ,MTOR,JUN,KAT2B,AKT1,AR,HSP90AB1,SOS1,RARB,TOP…
Gastrointestinal Disease	4.57E-33-1.16E-24	NPM1,PIK3R1,SOS2,DAB1,GORASP2,WWOX,SMARCB1,ETS1,SMAD2,DAPK1,YWHAG,ANXA2,CNTN2,CDH5,RAD18,FLNB,ILK,IQGAP2,PNRC1,IL27RA,TRAF1,TNFSF11,CCKAR,TUBB4B,SALL1,SFN,PPARA,SMAD3,PGR,PTEN,CTSD,DDX5,HSF4,JUND,CEACAM1,ITK,EWSR1,POLR1B,EPOR,BMX,AURKA,BCL2L1,INSR,KIAA0101,ESRRA,INPPL1,IQGAP1,YBX1,ERBB2,STAT1,GRIN2B,TP63,ADAM15,TFCP2,CDKN1B,PPP2CA,TYRO3,MKI67,NOS3,ATP1A1,DUSP3,RARA,NFKBIB,ZP2,FGR,USP9X,YWHAZ,NEFH…
Hepatic System Disease	4.57E-33-1.16E-24	NPM1,RAF1,PIK3R1,HRAS,VEGFA,RB1,PAK1,NR1I2,RARA,KEAP1,NFKBIB,FGR,FASLG,AHR,PDGFRB,TP53,STAT6,YWHAG,USP9X,ANXA2,STAT3,TLR9,MET,HSPA8,NCF1,CDH1,SQSTM1,TNF,ESR2,IFNAR1,GSTP1,ADAM17,HLA-A,NR1H4,FCGR2B,PRKCZ,MTOR,IQGAP2,JUN,AKT1,AR,HSP90AB1,PNRC1,CREB1,TOP2A,IGF1R,TLR3,IL27RA,CSNK2B,CTNNB1,CASP8,PLAT,TRAF1,EGFR,PSMB9,TNFSF11,FHIT,RPL4,TNFRSF1A,MYD88,TUBB4B,MAPK8,VIM,PLK1,MDM2,SH3BP5,FOS,KRT8,CDKN1A,CD…
Immunological Disease	3.28E-31-2.58E-24	PPP2CA,PIK3R1,SOS2,CCND1,ITGB3,VEGFA,RB1,LCK,SMARCB1,CAV1,MAP4K1,GFAP,AHR,FASLG,PDGFRB,TP53,SMAD2,STAT6,WT1,PDIA2,CD19,PRKCQ,TNFRSF10B,CREBBP,YWHAZ,NEFH,ANXA2,STAT3,TLR9,TCF3,ROR1,MAPK8IP1,NCF1,SYK,DUSP4,DOK1,ESR2,TNF,ARHGAP1,IFNAR1,LCP2,ALK,FYN,PTK2B,HLA-A,KPNA2,EPHA4,JAK2,EP300,KSR1,YES1,ARRB1,JUN,AKT1,PDE3B,NGFR,PNRC1,SOS1,CEBPA,DCC,TOP2A,TUBB4A,VDR,IL27RA,TLR3,CASP8,PLAT,EGFR,PSMB9,TNFSF11,TN…
Skeletal and Muscular Disorders	6.34E-31-9.04E-28	RAF1,SLC9A1,ADRB3,RB1,FHL2,CAV1,IGFBP1,TP53,SMAD2,PRKCQ,TRIM21,YAP1,TNFRSF10B,STAT3,TLR9,CNTN2,HSPA8,CDH1,NCF1,TNF,JAK2,FCGR2B,HSPA1L,DUSP2,KSR1,CD33,AR,TRIM40,NGFR,TUBB4A,RPS6KA2,TLR3,IL27RA,VDR,CASP8,TRAF1,TNFSF11,TNFRSF1A,MYD88,TUBB4B,VIM,FOS,CAMP,CDKN1A,LYN,NR4A1,MAP3K3,GRIN2A,BAD,SMAD3,HSPA5,PTEN,TRAF3IP2,MAPK3,DAG1,CAST,TAB1,CEACAM1,PTPN6,EPOR,IL6R,BMX,BCL2L1,PTPN11,DUSP1,SIRT1,AGTR1,IL6ST,…
Organismal Injury and Abnormalities	4.69E-30-1.16E-24	RAF1,TGFBR1,TYRO3,HRAS,GSK3A,NOS3,CCND1,ITGB3,ARNT,VEGFA,RB1,NR1I2,CAV1,NFKBIB,FGR,FASLG,AHR,PDGFRB,TP53,ETS1,STAT6,WT1,SMAD2,CD19,YAP1,CREBBP,STAT3,TLR9,MET,NCF1,EGLN1,HTT,ITGB6,ESR2,SNCA,TNF,GSTP1,IFNAR1,FYN,ZFP36,NR1H4,HLA-A,BMPR2,JAK2,MAP3K5,FCGR2B,PRKCZ,MTOR,AKT1,JUN,AR,CREB1,IGF1R,TOP2A,IL27RA,TLR3,VDR,CTNNB1,CASP8,PLAT,TRAF1,EGFR,TNFSF11,MYD88,TNFRSF1A,GRB2,IMPDH2,HLA-B,MAPK8,RGS16,VIM,MDM…
Dermatological Diseases and Conditions	5.19E-30-2.16E-26	RAF1,EPS8,TGFBR1,HRAS,MKI67,NOS3,ITGB3,VEGFA,RB1,PAK1,TXK,RARA,CAV1,PLCB1,SKAP1,NFKBIB,PRKD1,FGR,AHR,MCL1,PDGFRB,TP53,STAT6,CFL1,MITF,TBK1,TNK2,STAT3,JUNB,TCF3,KRT10,TLR9,ATF2,CDH1,ANKRD11,SYK,VAV1,RXRA,TNF,IFNAR1,GSTP1,LCP2,FYN,ADAM17,ZFP36,NR1H4,ILK,MED28,FCGR2B,DUSP2,TUBB2B,DUSP5,MTOR,JUN,AKT1,CSF2RA,NGFR,RARB,TOP2A,TUBB4A,VCL,VDR,CTNNB1,RXRB,EGFR,TNFSF11,TUBB4B,KRT17,TNFRSF1A,CSK,RGS16,MAPK8,…
Inflammatory Disease	5.19E-30-2.58E-24	TGFBR1,ADRB3,RB1,IGFBP1,TP53,SMAD2,PRKCQ,TRIM21,TNFRSF10B,TBK1,STAT3,NFKB2,KRT10,TLR9,CNTN2,HSPA8,CDH1,NCF1,SYK,RXRA,TNF,ESR2,NR1H4,EPHA4,FCGR2B,HSPA1L,DUSP2,TUBB2B,KSR1,CD33,TRIM40,AR,ARRB1,NGFR,TUBB4A,VDR,IL27RA,TLR3,CASP8,TRAF1,TNFSF11,KRT17,TUBB4B,MYD88,TNFRSF1A,VIM,FOS,CAMP,CDKN1A,NR4A1,LYN,ARHGDIA,SFN,MAP3K3,PPARA,GRIN2A,TRAF3,BAD,SMAD3,MBP,HSPA5,RARG,PTEN,TRAF3IP2,MAPK3,CEACAM1,PTPN6,EPOR,…
Neurological Disease	7.69E-29-2.58E-24	PIK3R1,GSK3A,CCND1,ADRB3,RB1,PRDM2,SMARCB1,TSC2,CAV1,TP53,SMAD2,DAPK1,AKT2,PRKCQ,TNFRSF10B,TBK1,ANXA2,NFKB2,STAT3,TLR9,MAPK8IP1,HSPA8,MET,NCF1,CDH1,PRKACA,TNF,ESR2,GAPDH,EPHA4,CD33,TGM2,ARRB1,AR,NGFR,TUBB4A,IL27RA,TLR3,VDR,CASP8,PRKDC,HNRNPU,TUBB4B,MYD88,TNFRSF1A,VIM,HSPA2,NTRK3,LYN,ID4,PPARA,FOXO4,GRIN2A,TRAF3,MBP,GNB2L1,PDPK1,HSPA5,RARG,PTEN,PGR,MYC,CTSD,CASP9,TRAF3IP2,MAPK3,IL6R,CBLB,BCL2L1,OG…
Renal and Urological Disease	3.39E-28-7.24E-27	RAF1,COPS2,MAPK1,MKI67,TUBB,BPGM,PGR,ITGB3,MYC,VEGFA,RB1,LCK,ETS2,TSC2,SMARCB1,CAV1,RET,PDGFRB,TP53,WT1,EWSR1,MITF,HSF1,FGFR1,ANXA2,STAT3,AURKA,GSN,MET,BCL2L1,CDH1,PRKCH,REL,THRB,ESR1,GSTP1,TSC1,RELA,ADAM17,DUSP6,HNF1A,BRAF,MTOR,NFKBIA,AR,FOXO3,MXD1,RARB,TOP2A,KIT,TUBB4A,ERBB2,CTNNB1,KHSRP,MAP2K1,RASSF1,EGFR,MUC1,PPARG,TUBB4B,SMAD7,YBX3,MDM2,AXL,CSF1R,FOS,MAPK14,FOXO1,ALYREF,NFE2,CD44,KDR,PRKCB
Connective Tissue Disorders	9.04E-28-9.04E-28	PPP2CA,ATXN1,NOS3,ADRB3,VEGFA,RB1,GFAP,MAP4K1,IGFBP1,NFKBIB,FASLG,AHR,MCL1,TP53,SMAD2,STAT6,CD19,TRIM21,PRKCQ,TOPBP1,SCN9A,TNFRSF10B,NR1H3,ITPR1,STAT3,TLR9,CNTN2,HSPA8,TRAF6,NCF1,CDH1,EGLN1,GAB1,HTT,TNF,SNCA,IFNAR1,TCF4,ADAM17,PTK2B,ZFP36,HLA-A,FCGR2B,DUSP2,PRKCZ,HSPA1L,CD33,KSR1,TRADD,LYZ,MTOR,AR,AKT1,TRIM40,NCOA2,NGFR,TUBB4A,TLR3,IL27RA,VDR,FKBP5,CASP8,KHSRP,TRAF1,PLAT,PSMB9,TNFSF11,TNFRSF1A,MY…
Psychological Disorders	1.29E-26-2.06E-26	PIK3R1,SRF,NOS3,LRPAP1,ADRB3,ARNT,CD2AP,PAK1,CAV1,GFAP,TP53,SCN9A,YWHAZ,NEFH,STAT3,MAPK8IP1,HTT,PRKACA,TNF,ESR2,SNCA,GAPDH,EPHA4,PRKCZ,EIF4EBP1,CD33,TGM2,AKAP2,MTOR,JUN,AR,PDE3B,NGFR,PRKCE,TUBB4A,VDR,EEF2K,CASP8,RXRB,PLAT,PRKDC,HNRNPU,TUBB4B,ACTB,MAPK8,VIM,APP,NTRK3,SREBF2,SREBF1,LRP1,PRKCB,PPARA,GAB2,GRIN2A,HSPA1A/HSPA1B,TP73,GNB2L1,TUBB,HSPA5,PTEN,PGR,CTSD,CASP9,ETS2,GSK3B,BRCA1,RPS6KB1,CASP3,I…

## Sheet: Table S7
Supplementary Table S7: Molecular and Cellular Functions of the primary interactome of the 5 kinome modulators reveal Cell Death and Differentiation as the most significant function
© 2000-2013 Ingenuity Systems, Inc. All rights reserved.
Category	p-value	Molecules
Cell Death and Survival	1.46E-158-3.27E-24	NPM1,TGFBR1,PIK3R1,GSK3A,LCK,WWOX,SMARCB1,TSC2,PPM1A,ETS1,FBL,PDIA2,SMAD2,AKT2,DAPK1,YWHAG,ANXA2,NFKB2,TCF3,CDH5,RAD18,PRKACA,RPS6KA1,THRB,FANCA,TSC1,FLNB,ILK,IQGAP2,ARRB1,MXD1,IL27RA,TRAF1,TNFSF11,KHDRBS1,SALL1,NR4A1,LYN,SFN,PPARA,FOXO4,SMAD3,GATA2,PTEN,PGR,CTSD,DDX5,MAPK3,JUND,CEACAM1,ITK,MAP3K14,TIAM1,EWSR1,EPOR,BMX,AURKA,BCL2L1,INSR,TCL1A,PEBP1,SPIB,KIAA0101,AKTIP,INPPL1,ERC1,IQGAP1,CUL3,LAMT…
Cellular Growth and Proliferation	6.86E-157-2.19E-24	NPM1,TGFBR1,DUSP8,PIK3R1,LCK,WWOX,TSC2,SMARCB1,PPM1A,ETS1,SMAD2,AKT2,DAPK1,RGS19,YWHAG,CRKL,ANXA2,NFKB2,TCF3,CDH5,RAD18,PRKACA,DOK1,RPS6KA1,THRB,FANCA,TSC1,ILK,IQGAP2,ARRB1,MXD1,IL27RA,TRAF1,TNFSF11,CCKAR,KHDRBS1,TUBB4B,LYN,NR4A1,SFN,RYK,PPARA,FOXO4,SMAD3,GATA2,PTEN,PGR,CTSD,DDX5,HSF4,MAPK3,JUND,MT-ND2,CEACAM1,ITK,MAP3K14,TIAM1,EWSR1,EPOR,BMX,AURKA,FYB,PIK3R3,BCL2L1,INSR,TCL1A,PEBP1,SPIB,APOH,KIA…
Cellular Movement	3.31E-126-2.02E-24	NPM1,TGFBR1,PIK3R1,MLLT4,GSK3A,DAB1,LCK,TSC2,SMARCB1,WWOX,PPM1A,ETS1,PDIA2,SMAD2,AKT2,CRKL,ANXA2,NFKB2,TCF3,CNTN2,CDH5,PRKACA,DOK1,RPS6KA1,THRB,TSC1,FLNB,SNX17,ILK,TUBB2B,ARRB1,MXD1,IL27RA,CCKAR,TNFSF11,KHDRBS1,LYN,NR4A1,SFN,PPARA,FOXO4,SMAD3,GATA2,PTEN,CTSD,MAPK3,JUND,CEACAM1,ITK,MAP3K14,TIAM1,EPOR,MAPKAPK5,BMX,AURKA,FYB,INSR,ELK3,PEBP1,ESRRA,INPPL1,IQGAP1,YBX1,ERBB2,STAT1,PXN,TP63,ADAM15,BTK,AP…
Cellular Development	3.39E-119-2.19E-24	NPM1,TGFBR1,DUSP8,PIK3R1,DAB1,LCK,WWOX,TSC2,SMARCB1,PPM1A,ETS1,SMAD2,RGS19,AKT2,DAPK1,YWHAG,CRKL,ANXA2,NFKB2,TCF3,CNTN2,CDH5,PRKACA,DOK1,RPS6KA1,THRB,FANCA,FLNB,TSC1,ILK,IQGAP2,ARRB1,MXD1,IL27RA,TRAF1,TNFSF11,CCKAR,KHDRBS1,SALL1,LYN,NR4A1,SFN,RYK,PPARA,FOXO4,YWHAH,SMAD3,GATA2,PTEN,PGR,CTSD,DDX5,HSF4,MAPK3,JUND,MT-ND2,CEACAM1,ITK,MAP3K14,TIAM1,EWSR1,EPOR,BMX,AURKA,FYB,PIK3R3,BCL2L1,INSR,TCL1A,PEBP…
Gene Expression	3.45E-110-3.14E-47	NPM1,TGFBR1,PIK3R1,LCK,SMARCB1,WWOX,PPM1A,ETS1,SMAD2,DAPK1,AKT2,YWHAG,CD3EAP,NFKB2,TCF3,PRKACA,RPS6KA1,THRB,TSC1,ILK,ARRB1,MXD1,TRAF1,TNFSF11,KHDRBS1,POLR1E,SALL1,LYN,NR4A1,PPARA,FOXO4,YWHAH,SMAD3,GATA2,PTEN,PGR,DDX5,HSF4,MAPK3,JUND,MAP3K14,EWSR1,POLR1B,EPOR,BMX,FYB,INSR,ELK3,PEBP1,SPIB,APOH,ESRRA,ZNF219,INPPL1,IQGAP1,STUB1,YBX1,PPARGC1B,ERBB2,STAT1,PXN,TP63,SMARCE1,BTK,NFE2,TFCP2,CDKN1B,GFPT1,IT…
Cell Cycle	9.43E-109-3.45E-24	RAF1,MYH10,DYRK1B,NPM1,TGFBR1,PIAS2,PIK3R1,PPP2R3B,CCND1,PKN2,RB1,LCK,FHL2,PRDM2,NR1I2,CENPE,GORASP2,WWOX,TSC2,SMARCB1,CAV1,PPM1A,TP53,ETS1,SMAD2,WT1,PRKCQ,YWHAG,TRIM21,HSF1,ANXA2,STAT3,KRT10,TLR9,TCF3,ATF2,HSPA8,MET,CDH1,CDH5,JDP2,SYK,PRKACA,RAD18,THRB,RXRA,TNF,PTPRA,ESR2,FANCA,PTPN2,ILK,JAK2,FCGR2B,KSR1,ARRB1,AR,NGFR,MXD1,RPS6KA2,CSNK2B,PRKDC,TNFSF11,FHIT,PAK2,KHDRBS1,GRB2,FOS,NTRK3,CDKN1A,LYN,…
Cell Morphology	3.28E-94-6.16E-25	NPM1,TGFBR1,PIK3R1,GSK3A,DAB1,LCK,WWOX,TSC2,ETS1,SMAD2,DAPK1,RGS19,AKT2,CRKL,NFKB2,TCF3,CNTN2,CDH5,PRKACA,RAD18,RPS6KA1,DOK1,THRB,SEPN1,TSC1,FLNB,ILK,IQGAP2,ARRB1,MXD1,CCKAR,TNFSF11,NR4A1,LYN,RYK,PPARA,FOXO4,YWHAH,SMAD3,GATA2,PTEN,PGR,CTSD,HSF4,MAPK3,ITK,TIAM1,EWSR1,EPOR,MAPK8IP2,MAPKAPK5,AURKA,BCL2L1,INSR,SYN1,TCL1A,PEBP1,SPIB,KIAA0101,ESRRA,INPPL1,IQGAP1,CUL3,STUB1,YBX1,PPARGC1B,ERBB2,STAT1,PXN…
Post-Translational Modification	4.34E-80-6.94E-30	NPM1,DYRK1B,RAF1,PDE6G,TGFBR1,PIK3R1,CCDC88C,GSK3A,DAB1,CCND1,PKN2,RB1,LCK,CENPE,TSC2,MAP3K2,TP53,SMAD2,DAPK1,AKT2,PRKCQ,VRK2,HSF1,ANXA2,CNTN2,MET,SYK,PRKACA,RPS6KA1,SQSTM1,TNF,PTPRA,PTPN2,ILK,EPHA4,JAK2,FCGR2B,CD33,YES1,ARR3,ARRB1,DAB2,RPS6KA2,TNFSF11,PAK2,TRIB3,SH3BP5,HSPA2,CAMP,ABI1,NTRK3,BCL10,CDKN1A,LYN,MAP3K8,SFN,MAP3K3,MAP3K11,GNB2L1,PDPK1,PTEN,STK4,MAP2K2,MAPK3,SMAD1,MAP3K14,PTPN6,EPOR,MA…
Cellular Function and Maintenance	3.47E-76-6.16E-25	EVL,NPM1,TGFBR1,PIK3R1,DAB1,LCK,GORASP2,TSC2,WWOX,CDC40,ETS1,SMAD2,DAPK1,AKT2,RGS19,CRKL,ANXA2,NFKB2,TCF3,CNTN2,CDH5,PRKACA,DOK1,DLGAP1,TSC1,FLNB,ILK,ARRB1,MXD1,IL27RA,CCKAR,TNFSF11,LYN,NR4A1,RYK,PPARA,YWHAH,SMAD3,GATA2,PTEN,CTSD,MAPK3,ITK,MAP3K14,TIAM1,EPOR,MAPKAPK5,BMX,AURKA,FYB,BCL2L1,COMMD1,INSR,SYN1,TCL1A,SPIB,APOH,KIAA0101,AKTIP,INPPL1,IQGAP1,CUL3,STUB1,YBX1,PPARGC1B,ERBB2,STAT1,GRIN2B,PXN,…
Cell Signaling	1.49E-75-1.76E-24	NPM1,RAF1,RAPGEF1,PDE6G,ZC3H12A,TGFBR1,PIK3R1,DAB1,ADRB3,MPZL1,RB1,LCK,CENPE,TSC2,CAV1,PPM1A,DNM2,PRKD1,MAP3K2,RAB3GAP2,TP53,AKT2,DAPK1,CD3EAP,CRKL,SH2D3A,STAT3,TLR9,MAPK8IP1,CNTN2,MET,NCF1,SYK,PRKACA,DUSP4,CFLAR,SQSTM1,DOK1,PTPRA,TNF,TSC1,PTPN2,GUCY2C,ILK,DUSP22,JAK2,SCT,FCGR2B,CD33,KSR1,TGM2,ARRB1,AR,NGFR,DAB2,IL27RA,TLR3,RPS6KA2,CSNK2B,CASP8,TNFSF11,PAK2,TNFRSF1A,MYD88,GRB2,SALL1,TRIB3,SH3BP5,…
Cellular Assembly and Organization	7.44E-72-7.07E-29	EVL,NPM1,MYH10,RAF1,PIAS2,TGFBR1,PIK3R1,DAB1,SLC9A1,ADRB3,PKN2,RB1,LCK,FHL2,CENPE,GORASP2,TSC2,WWOX,CAV1,DLG4,DNM2,PRKD1,TP53,ETS1,SMAD2,WT1,DAPK1,PRKCQ,CRKL,TBK1,STAT3,MAPK8IP1,PLD1,CNTN2,ATF2,HSPA8,MET,CDH1,SYK,PRKACA,RPS6KA1,DOK1,PTPRA,TNF,FLNB,TSC1,TRIP10,ILK,GAPDH,EPHA4,KSR1,TGM2,ARRB1,AR,TRIM27,SORBS1,NGFR,DAB2,PI4K2B,PDCD6IP,TNFSF11,CCKAR,FHIT,GRB2,TNFRSF1A,MYD88,KRT17,VIM,FOS,CRMP1,TNS3,A…
Free Radical Scavenging	1.75E-63-9.48E-57	RAPGEF1,ZC3H12A,PIK3R1,HRAS,NOS3,ITGB3,ARNT,RB1,LCK,NR1I2,TSC2,CAV1,FASLG,FGR,AHR,PDGFRB,TP53,ETS1,PDIA2,AKT2,PRKCQ,RRAS,YWHAZ,STAT3,NLRX1,TRAF6,NCF1,CDH5,SYK,HTT,VAV1,SQSTM1,ESR2,TNF,SNCA,LCP2,FYN,TSC1,ILK,MAP3K5,JAK2,PRKCZ,TGM2,TRADD,AKT1,HSP90AB1,DOK4,NGFR,PRKCE,VDR,CASP8,EGFR,TNFSF11,TNFRSF1A,MYD88,ACTB,MAPK8,PLCG1,SH3BP5,APP,FADD,FOS,TRAF2,CAMP,SREBF2,SREBF1,SPRY2,CDKN1A,LYN,CD44,NR4A1,ARHGD…
DNA Replication, Recombination, and Repair	2.45E-58-9.94E-27	RAF1,NPM1,PIK3R1,NF2,HRAS,CCND1,AFAP1L2,VEGFA,RB1,PAK1,KEAP1,TSC2,SMARCB1,CAV1,IGFBP1,PRKD1,FASLG,AHR,PDGFRB,MCL1,TP53,FBL,STAT6,STAT5A,WT1,DAPK1,GUCY1A3,TOPBP1,STAT3,MAPK8IP1,HSPA8,MET,NCF1,GAB1,IRS1,HTT,PRKACA,RAD18,PTPRA,SNCA,TNF,ALK,FYN,PTK2B,CDT1,KPNA2,MAPK15,CUL1,CRK,SCT,PRKCZ,KSR1,EP300,CHEK1,MTOR,AR,ARRB1,JUN,AKT1,NCOA2,CREB1,CEBPA,TOP2A,IGF1R,CTNNB1,CASP8,LIG3,EGFR,TNFSF11,FHIT,GRB2,TNFR…
Cell-To-Cell Signaling and Interaction	3.18E-57-3.66E-25	NPM1,RAF1,RAPGEF1,TGFBR1,PIK3R1,MLLT4,GSK3A,CCND1,ADRB3,RB1,LCK,FHL2,NR1I2,WWOX,TSC2,CAV1,MAP3K2,TP53,ETS1,WT1,SMAD2,AKT2,DAPK1,PRKCQ,CRKL,TNFRSF10B,ANXA2,STAT3,NFKB2,TLR9,PLD1,MET,NCF1,CDH1,CDH5,SYK,SQSTM1,ITGB6,TNF,F2RL2,TRIP10,NR1H4,ILK,EPHA4,JAK2,FCGR2B,SCT,KSR1,TGM2,AR,MXD1,DAB2,TLR3,IL27RA,CASP8,PRKDC,TNFSF11,PAK2,MYD88,GRB2,TNFRSF1A,RGS16,VIM,FOS,CAMP,BCL10,NTRK3,CDKN1A,LYN,NR4A1,MAP3K8,PP…
Protein Synthesis	4.43E-49-6.19E-28	NPM1,ZC3H12A,PPP2CA,PIK3R1,SRF,GSK3A,CD46,CCND1,VEGFA,LCK,NR1I2,RARA,TSC2,SRCIN1,CAV1,IGFBP1,FGR,AHR,TP53,WT1,PDIA2,DAPK1,RGS19,PRKCQ,COPS5,USP9X,NR1H3,JUNB,IER3,TCF3,MAPK8IP1,CDH1,MTPN,IRS1,HTT,SQSTM1,TNF,MTIF3,SNCA,IFNAR1,DLGAP1,FYN,TSC1,ADAM17,PTK2B,PTPN2,ZFP36,MAPK15,GAPDH,CRK,JAK2,FCGR2B,PRKCZ,EP300,EIF4EBP1,TGM2,MTOR,TRHDE,JUN,AKT1,NCOA2,FBXW11,CREB1,EEF2K,VDR,CASP8,PLAT,EGFR,CCKAR,KHDRBS1,…
Small Molecule Biochemistry	3.4E-37-9.55E-25	RAPGEF1,ZC3H12A,TGFBR1,PIK3R1,GSK3A,DAB1,ADRB3,RB1,LCK,NR1I2,WWOX,TSC2,CAV1,DLG4,PPM1A,DNM2,PRKD1,TP53,SMAD2,AKT2,PRKCQ,YWHAG,STAT3,TLR9,PLD1,HSPA8,MET,NCF1,CDH5,SYK,PRKACA,SQSTM1,DOK1,RXRA,THRB,TNF,ESR2,TSC1,GUCY2C,NR1H4,ILK,EPHA4,JAK2,FCGR2B,SCT,TGM2,APPL1,AR,SORBS1,NGFR,TLR3,IL27RA,VDR,PDCD6IP,CASP8,PRKDC,TNFSF11,PAK2,MYD88,TNFRSF1A,VIM,TRIB3,TNKS2,FOS,CAMP,ABI1,NTRK3,CDKN1A,LYN,NR4A1,MAP3K8,A…
Carbohydrate Metabolism	5.98E-36-6.73E-32	PPARA,RAPGEF1,FOXO4,GFPT1,PIK3R1,SRF,PDPK1,LIPE,GSK3A,NOS3,ADRB3,PTEN,MYC,IKBKB,IKBKG,NR1I2,CAV1,PPM1A,PRKD1,STAT5A,MAP3K14,PTPRE,AKT2,PRKCQ,RAC1,PLD1,NCOA3,MARK3,CBL,DUSP9,PTPN11,PRKCD,IRS1,HTT,SIRT1,NCOA1,INSR,SQSTM1,VDAC1,TNF,RELA,NR1H4,ESRRA,INPPL1,NPHS1,HNF1A,FAS,PRKCZ,APPL1,MTOR,AKT1,CSF2RA,NGFR,PTPN1,IGF1R,CEBPA,ERBB2,ADRB2,PLAT,PRKCA,EGFR,MUC1,PPARG,DGKA,CD36,MAPK9,PPP1R15A,TNKS2,ERBB3,CE…
Amino Acid Metabolism	4.31E-34-4.31E-34	TGFBR1,MAPK1,ADRBK1,EPHB2,PDPK1,ITGB3,PTK2,VEGFA,IKBKB,LCK,MAPK3,GSK3B,FGR,PDGFRB,TP53,STAT5A,PTPN6,FGFR1,IL6R,TNK2,ARRB2,DUSP1,PRKCD,SYK,PRKACA,INSR,FYN,GATA1,PTK2B,ABL1,EPHA4,MYLK,JAK2,CHEK1,BCL2,MTOR,AKT1,CDK5,EFNA5,IGF1R,KIT,PRKCE,CHUK,MAPKAPK2,PRKCA,EGFR,PXN,PAK2,CSK,MAPK8,ACVR1,MAPK9,CSF1R,BTK,TLR4,ABL2,ABI1,LYN,CD44,KDR,PRKCB
Molecular Transport	6.73E-32-4.14E-24	RAPGEF1,NPM1,PIK3R1,GSK3A,SLC9A1,ADRB3,NR1I2,WWOX,TSC2,SMARCB1,SRCIN1,CAV1,DLG4,PPM1A,DNM2,PRKD1,TP53,RAB3GAP2,KCNQ5,AKT2,PRKCQ,ADD2,ANXA2,STAT3,MAPK8IP1,PLD1,HSPA8,MET,CDH5,SYK,PRKACA,SQSTM1,RXRA,THRB,TNF,ESR2,TSC1,GUCY2C,NR1H4,ILK,FCGR2B,SCT,TGM2,APPL1,YES1,AR,SORBS1,NGFR,VDR,PDCD6IP,CASP8,CCKAR,KHDRBS1,MYD88,TNFRSF1A,TOB1,TRIB3,TNKS2,SNCG,FOS,CAMP,NTRK3,SH2B2,CDKN1A,LYN,NR4A1,MAP3K8,ARHGDIA,PP…
Lipid Metabolism	1.06E-29-9.55E-25	PLD2,PIK3R1,HRAS,DAB1,NOS3,LRPAP1,ADRB3,ITGB3,ARNT,VEGFA,ATP1A1,NR1I2,RARA,TSC2,WWOX,CAV1,PLCB1,DLG4,PRKD1,FGR,DNM2,FASLG,AHR,PDGFRB,TP53,SMAD2,STAT5A,STAT6,AKT2,YWHAG,MITF,NR1H3,STAT3,PLD1,CYP4F2,HSPA8,NCF1,CDH5,SYK,IRS1,HTT,THRB,RXRA,ESR2,TNF,SNCA,FYN,PTK2B,GUCY2C,NR1H4,BMPR2,JAK2,SCT,FCGR2B,AVPR1A,EP300,TGM2,MTOR,AR,JUN,AKT1,SORBS1,PDE3B,NGFR,EFNA5,CREB1,RARB,CEBPA,PRKCE,TLR3,VDR,CAV2,CASP8,PD…
Cellular Compromise	3.91E-29-3.91E-29	MAPK1,HSPA1A/HSPA1B,HRAS,PDPK1,CD46,PAK1,LCK,IKBKG,FASLG,FGR,CEACAM1,ITK,TP53,PTPN6,PRKCQ,EPOR,CREBBP,RAC1,NFKB2,TLR9,ARRB2,PTPN11,SYK,PRKCD,HTT,VAV1,CFLAR,TNF,SNCA,IFNAR1,RELA,PTK2B,HLA-A,TRIP10,TNFAIP3,NFKB1,FAS,BCL2,IRAK1,AR,SP1,MAP3K7,ERBB2,STAT5B,STAT1,NOS2,MAP2K1,PRKCA,GRIN2B,GRIN1,CD59,MYD88,TNFRSF1A,HLA-B,SMAD7,XIAP,APP,FOS,WAS,BCL10,LYN,CD44,NFATC2

## Sheet: Table S8
Supplementary Table S8: 85% of the IDR prediction has 80% or more concrodance with experimentally validated structures from PDB database.
Protein Name	UniProt_ID	% Agreement	Structured	Total_IDR1	% Overlap with IDR1	Structured	Total_IDR2	% Overlap with IDR2	Structured	Total_IDR3	% Overlap with IDR3	Structured	Total_IDR4	% Overlap with IDR4	Structured	Total_IDR5	% Overlap with IDR5	Structured	Total_IDR6	% Overlap with IDR6	Structured	Total_IDR7	% Overlap with IDR7	Structured	Total_IDR8	% Overlap with IDR8
PDPK1	O15530	0.712	20	85	0.764706	16	40	0.6
AKT1	P31749	0.636364	12	32	0.625	12	34	0.647059
KPCE	Q02156	0.896825	0	36	1	13	90	0.855556
KS6B1	P23443	1	0	75	1	0	75	1
BCR	P11274	0.917333	31	31	0	0	101	1	0	58	1	0	108	1	0	52	1	0	25	1
PDK1	Q15118	0.754717	13	53	0.754717
TAF1	P21675	0.9933	0	33	1	0	74	1	0	30	1	0	40	1	0	32	1	0	87	1	0	56	1	4	245	0.983673
STK11	Q15831	1	0	40	1
VRK2	Q86Y07	1	0	28	1	0	30	1
MK08	P45983	1	0	58	1
IKKB	O14920	0.397727	44	44	0	9	44	0.795455
PLK1	P53350	0.9	4	40	0.9
WEE1	P30291	1	0	225	1	0	56	1
MP2K1	Q02750	0.452381	16	54	0.703704	30	30	0
MP2K7	O14733	1	0	92	1
MP2K4	P45985	1	0	73	1
M3K5	Q99683	1	0	45	1
SRC	P12931	1	0	64	1
EGFR	P00533	1	0	39	1
FYN	P06241	1	0	35	1
ABL1	P00519	0.958167	0	197	1	21	305	0.931148
LYN	P07948	0.967742	2	62	0.967742
BMPR2	Q13873	0.988201	4	34	0.882353	0	102	1	0	44	1	0	33	1	0	126	100
M3K8	O43318	0.979508	5	111	0.954955	0	73	1	0	60	1
ARAF	P10398	1	0	32	1	0	102	1
AURKA	O14965	0.945736	7	129	0.945736
FAK1	Q05397	0.824034	0	33	1	21	85	0.752941	20	115	0.826087
KC1G1	Q9HCP0	1	0	41	1	0	43	1
CSK21	P68400	0.683333	19	60	0.683333
mTOR	P42345	0.825243	0	28	1	18	75	0.76
ABL2	P42684	0.993562	0	56	1	0	108	1	0	173	1	3	129	0.976744
AKT3	Q9Y243	0.859155	10	37	0.72973	0	34	1
AKT2	P31751	1	0	28	1
BRAF	P15056	0.939271	0	40	1	3	58	0.948276	0	74	1	12	75	0.84
JAK2	O60674	1	0	33	1
PASK	Q96RG2	1	0	71	1	0	83	1	0	30	1	0	40	1
PAK7	Q9P286	0.942149	0	53	1	0	95	1	14	94	0.851064
PDGFRb	P09619	0.963415	3	82	0.963415
PKN1	Q16512	0.811388	47	47	0	6	32	0.8125	0	26	1	0	45	1	0	52	1	0	79	1
RAF1	P04049	0.857143	18	126	0.857143
SRPK2	P78362	0.979452	0	27	1	0	212	1	6	53	0.886792
STK3	Q13188	0.871951	19	128	0.851562	2	36	0.944444
OBSCN	Q5VST9	1	0	30	1	0	82	1	0	33	1	0	157	1	0	57	1	0	39	1
Legend
Protein Name	Name of the protein
UniProt_ID	Uniprot identifier of the given protein
% Agreement	%Agreement between all the IDRs of the protwin with its experimentally validated structure(s)
Structured	Number of residues from an IDR that are shown to be structured in the protein's experimentally validated structure(s)
Ttotal_IDR1	Length (AA residues) of the given IDR
%Overlap wth IDR1	Overlap of AA residues not found in the protein's crystallized structure with total number of AA residues in the given IDR

## Sheet: Table S9
Supplementary Table S9: Molecular Recognition Features (MoRFs) prediction reveals positive degree of correlation between number of MoRFs and percentage disorderliness of a protein.
Uniprot ID	Start	End		Start	End		Start	End		Start	End		Start	End		Start	End		Start	End		Start	End		Start	End		Start	End		Start	End		Start	End		Start	End		Start	End		Start	End		Start	End		Start
P31749
morf1
morf2	414	431
P31751
morf1
morf2
Q9Y243
morf1
morf2	457	474
P25098
morf1
morf2
P35626
morf1
morf2	619	636		670	687
O14578
morf1
morf2	445	462		503	520		572	589		621	638		715	732		755	772		786	803		812	829		931	948		961	978		1006	1023		1047	1064		1104	1121		1163	1180		1203	1220		1254	1271		1887
Q09013
morf1
morf2	494	511		559	576
Q6DT37
morf1	1434	1452
morf2	374	391		484	501		561	578		681	698		712	729		806	823		845	862		1435	1452		1475	1492
P32298
morf1
morf2	30	47
P34947
morf1
morf2	1	18		411	428		561	578
P43250
morf1
morf2	415	432		548	565
Q8WTQ7
morf1	4	22
morf2	409	426		451	468		536	553
O95835
morf1	115	133		562	580		586	604
morf2	14	31		70	87		116	133		211	228		338	355		454	471		500	517		563	580		587	604		635	652		672	689
Q9NRM7
morf1	171	189		519	537
morf2	4	21		65	82		172	189		238	255		302	319		324	341		389	406		435	452		496	513		520	537		598	615		1029	1046		1071	1088
Q9Y2H9
morf1	704	722		763	781		1281	1299		1378	1396
morf2	7	24		68	85		128	145		705	722		764	781		798	815		879	896		1096	1113		1174	1191		1282	1299		1325	1342		1379	1396
Q6P0Q8
morf1	305	323		782	800		838	856		922	940		1048	1066		1231	1249		1368	1386		1409	1427		1471	1489		1719	1737
morf2	77	94		125	142		159	176		206	223		255	272		783	800		839	856		884	901		923	940		1049	1066		1232	1249		1369	1386		1410	1427		1472	1489		1609	1626		1650	1667		1720
O60307
morf1	730	748		774	792		1238	1256
morf2	65	82		115	132		731	748		775	792		1082	1099		1239	1256
O15021
morf1	75	93		127	145		156	174		968	986		1031	1049		1088	1106		1408	1426		1451	1469		1494	1512		1869	1887		2330	2348		2376	2394		2517	2535
morf2	76	93		128	145		157	174		265	282		326	343		934	951		969	986		1032	1049		1084	1101		1278	1295		1409	1426		1452	1469		1493	1510		1541	1558		1697	1714		1750	1767		1797
Q96GX5
morf1
morf2	642	659
Q5VT25
morf1	1591	1609
morf2	480	497		527	544		563	580		871	888		905	922		1570	1587		1592	1609		1639	1656		1683	1700
Q9Y5S2
morf1
morf2	431	448		510	527		561	578		651	668		717	734		773	790		934	951		1582	1599		1694	1711
O75582
morf1
morf2	711	728		785	802
O75676
morf1
morf2	700	717
Q15208
morf1	15	33
morf2	16	33		74	91
Q9Y2H1
morf1	13	31
morf2	14	31
P23443
morf1	8	26
morf2	9	26		58	75		345	362		444	461		508	525
Q9UBS0
morf1
morf2	1	18		418	435
O15530
morf1	84	102
morf2	2	19		413	430
P17612
morf1
morf2
P22694
morf1
morf2
P22612
morf1
morf2
P17252
morf1
morf2
P05771
morf1	257	275		643	661
morf2	311	328		592	609		644	661
Q05655
morf1
morf2
Q02156
morf1	364	382
morf2	365	382
P05129
morf1
morf2
P24723
morf1
morf2	662	679
P41743
morf1
morf2	160	177
Q04759
morf1
morf2
Q05513
morf1
morf2
Q13976
morf1	611	629
morf2	3	20		34	51		612	629		654	671
Q13237
morf1
morf2	11	28		69	86		99	116		130	147		732	749
Q16512
morf1
morf2	12	29		74	91		142	159		180	197		223	240		876	893
Q16513
morf1
morf2	91	108		263	280		284	301		329	346		599	616		934	951		967	984
Q6P5Z2
morf1	239	257		439	457
morf2	47	64		94	111		122	139		147	164		186	203		236	253		278	295		488	505
P51817
morf1
morf2
Q15835
morf1
morf2
Q13464
morf1	1089	1107
morf2	2	19		386	403		426	443		524	541		603	620		702	719		739	756		773	790		793	810		858	875		905	922		975	992		1047	1064		1090	1107
O75116
morf1	401	419		562	580		1112	1130
morf2	451	468		563	580		603	620		810	827		873	890		936	953		983	1000		1016	1033		1075	1092		1113	1130
Q15418
morf1
morf2	679	696		718	735
P51812
morf1
morf2	723	740
Q15349
morf1
morf2	1	18
Q9UK32
morf1
morf2
Q96S38
morf1	508	526
morf2	161	178		184	201		245	262		509	526		609	626		666	683		763	780
Q9Y6S9
morf1	244	262
morf2	245	262
O00141
morf1	25	43
morf2
Q9HBY8
morf1	42	60
morf2	36	53
Q96BR1
morf1
morf2
Q8WU08
morf1
morf2	309	326		349	366		379	396
Q9NY57
morf1
morf2
Q86UX6
morf1
morf2	420	437		469	486
Q8NI60
morf1
morf2	140	157
Q96D53
morf1	92	110
morf2	36	53		93	110
Q86TW2
morf1
morf2
Q3MIX3
morf1
morf2
Q7Z695
morf1
morf2
Q96L96
morf1	84	102		256	274		606	624		668	686		951	969
morf2	50	67		85	102		213	230		257	274		397	414		457	474		490	507		607	624		669	686		952	969		1098	1115		1155	1172		1890	1907
Q96QP1
morf1	633	651
morf2	3	20		508	525		538	555		577	594		634	651		671	688		742	759		808	825		862	879		887	904		927	944
Q86TB3
morf1	134	152		506	524		691	709		908	926		1321	1339		1490	1508		1565	1583		1605	1623		1716	1734
morf2	135	152		224	241		263	280		323	340		507	524		547	564		586	603		626	643		692	709		724	741		755	772		788	805		869	886		909	926		978	995		1105	1122		1183
Q96QT4
morf1
morf2	551	568		578	595		1510	1527		1822	1839		1848	1865
Q9BX84
morf1	1547	1565
morf2	1457	1474		1516	1533		1589	1606		1980	1997
O00418
morf1	2	20		408	426
morf2	3	20		409	426		676	693
P11274
morf1	227	245		274	292		313	331
morf2	4	21		48	65		75	92		159	176		228	245		248	265		275	292		314	331		354	371		654	671		778	795		828	845
O14874
morf1
morf2
Q15118
morf1
morf2
Q15119
morf1
morf2
Q15120
morf1
morf2
Q16654
morf1
morf2
Q13315
morf1
morf2	1	18		1992	2009
Q13535
morf1
morf2
P78527
morf1	2036	2054
morf2	1990	2007		2037	2054		3226	3243
P42345
morf1	14	32
morf2	15	32
Q96Q15
morf1
morf2	27	44		72	89		112	129		3536	3553
Q9Y4A5
morf1
morf2
Q9BRS2
morf1	550	568
morf2	30	47		69	86		551	568
Q9BVS4
morf1	330	348		455	473
morf2	331	348		456	473		490	507		532	549
O14730
morf1	107	125
morf2	108	125		153	170		185	202		502	519
P21675
morf1	129	147		316	334		658	676		1131	1149		1653	1671
morf2	93	110		130	147		221	238		284	301		516	533		659	676		1053	1070		1099	1116		1132	1149		1196	1213		1268	1285		1310	1327		1448	1465		1654	1671		1794	1811
Q16566
morf1
morf2	390	407
Q14012
morf1
morf2	342	359
Q8IU85
morf1
morf2	346	363
Q96NX5
morf1
morf2
Q6P2M8
morf1
morf2
Q9UQM7
morf1	306	324
morf2	307	324
Q13554
morf1
morf2	335	352
Q13557
morf1
morf2	308	325		473	490
Q13555
morf1	301	319
morf2	302	319		369	386		420	437
Q13131
morf1	539	557
morf2	540	557
P54646
morf1	492	510		531	549
morf2	373	390		493	510
Q8IWQ3
morf1	310	328		477	495
morf2	311	328		478	495		659	676
Q8TDC3
morf1	319	337		350	368		551	569		690	708
morf2	320	337		351	368		552	569		691	708		761	778
O14757
morf1
morf2	285	302		333	350
P57058
morf1	497	515		655	673		696	714
morf2	450	467		492	509		563	580		612	629		656	673
Q15831
morf1
morf2	352	369		384	401		416	433
Q7KZI7
morf1	350	368		401	419
morf2	402	419		587	604		628	645		648	665		691	708
Q9P0L2
morf1	412	430		437	455		558	576		638	656
morf2	413	430		438	455		501	518		559	576		603	620		639	656		660	677		700	717
P27448
morf1	400	418
morf2	401	418		504	521		551	568		596	613		620	637		658	675
Q96L34
morf1	416	434		506	524		565	583
morf2	1	18		417	434		507	524		561	578		604	621
Q14680
morf1
morf2	525	542
Q8IY84
morf1	5	23
morf2	6	23		342	359
O60285
morf1	48	66		417	435		586	604
morf2	30	47		49	66		371	388		411	428		463	480		587	604
Q9H093
morf1	406	424		479	497
morf2	3	20		48	65		344	361		384	401		407	424		480	497		520	537		557	574		600	617
Q96RG2
morf1
morf2	4	21		38	55		565	582		797	814		1306	1323
Q9H0K1
morf1	386	404		479	497		683	701
morf2	422	439		480	497		536	553		566	583		684	701		718	735		781	798
Q9Y2K2
morf1	437	455		650	668		788	806		991	1009		1237	1255
morf2	491	508		651	668		711	728		789	806		816	833		861	878		919	936		958	975		992	1009		1049	1066		1094	1111		1238	1255
P57059
morf1	401	419		471	489		503	521
morf2	472	489		504	521		612	629		759	776
Q9NRH2
morf1
morf2	354	371		393	410		427	444		550	567
Q9BYT3
morf1
morf2	16	33
Q8NCB2
morf1
morf2
O14936
morf1
morf2	556	573
P53355
morf1	10	28
morf2	274	291		675	692
O43293
morf1
morf2	21	38		308	325		353	370		389	406		420	437
Q9UIK4
morf1
morf2
O94768
morf1
morf2	346	363
Q9UEE5
morf1	48	66
morf2	49	66		310	327		367	384
O15075
morf1
morf2	9	26		679	696
Q9C098
morf1	6	24		60	78
morf2	7	24		61	78		236	253		269	286		620	637
Q8N568
morf1	1	19		46	64
morf2	1	18		47	64		347	364
Q16644
morf1
morf2	333	350		365	382
Q8IW41
morf1
morf2
P49137
morf1
morf2	360	377		383	400
Q9HBH9
morf1	19	37		447	465
morf2	20	37		448	465
Q9BUB5
morf1
morf2	425	442
Q15746
morf1	380	398		948	966		984	1002		1210	1228		1230	1248
morf2	279	296		390	407		426	443		848	865		902	919		949	966		985	1002		1041	1058		1211	1228		1231	1248
Q8WZ42
morf1	3819	3837		3868	3886		10355	10373		10386	10404		10419	10437		10453	10471		10682	10700		10840	10858		11115	11133		11141	11159		11980	11998		33007	33025		33078	33096		33137	33155		33412	33430		33510	33528		33533
morf2	193	210		230	247		365	382		473	490		514	531		774	791		840	857		1245	1262		1933	1950		2004	2021		3706	3723		3763	3780		3820	3837		3869	3886		3907	3924		4051	4068		9573
Q9H1R3
morf1	1	19		49	67		145	163		253	271
morf2	1	18		50	67		100	117		146	163		198	215		254	271
Q32MK0
morf1	232	250
morf2	32	49		233	250		427	444		461	478
Q86YV6
morf1
morf2	14	31
Q16816
morf1
morf2
P15735
morf1
morf2
P11309
morf1
morf2	38	55
Q9P1W9
morf1	293	311
morf2	253	270
Q86V86
morf1
morf2
Q15139
morf1
morf2	238	255		895	912
O94806
morf1	337	355
morf2	338	355
Q9BZL6
morf1
morf2	376	393
P11801
morf1
morf2	25	42		407	424
Q96QS6
morf1	367	385
morf2	368	385
O96017
morf1
morf2	526	543
Q8N2I9
morf1
morf2	39	56		376	393
Q96RU8
morf1
morf2	26	43
Q92519
morf1
morf2	4	21		326	343
Q96RU7
morf1
morf2
Q5VST9
morf1	4791	4809		6318	6336		6808	6826		6862	6880		7388	7406
morf2	165	182		216	233		1670	1687		3860	3877		4792	4809		5006	5023		5530	5547		5658	5675		6768	6785		6809	6826		6863	6880		6901	6918		6940	6957		7027	7044		7060	7077		7183	7200		7349
Q15772
morf1	242	260		399	417		1121	1139		2092	2110
morf2	144	161		181	198		243	260		400	417		457	474		490	507		587	604		635	652		867	884		1185	1202		1885	1902		2058	2075		2093	2110		2131	2148		2347	2364		2388	2405		2445
O75962
morf1	1878	1896
morf2	259	276		1192	1209		1251	1268		1656	1673		1879	1896		2470	2487		2492	2509		3079	3096
O60229
morf1	1644	1662
morf2	1645	1662		1713	1730		1875	1892
Q96PF2
morf1	340	358
morf2	253	270		341	358
Q96PN8
morf1
morf2
Q9BXA7
morf1
morf2	297	314
Q9BXA6
morf1	245	263
morf2
Q6SA08
morf1
morf2
P48729
morf1
morf2	320	337
Q8N752
morf1
morf2
P48730
morf1
morf2	398	415
P49674
morf1
morf2	399	416
P78368
morf1
morf2	386	403
Q9Y6M4
morf1
morf2	369	386		418	435
Q9HCP0
morf1
morf2	345	362		395	412
Q5TCY1
morf1	833	851
morf2	333	350		457	474		498	515		536	553		665	682		704	721		834	851
Q6IQ55
morf1	728	746		862	880
morf2	388	405		427	444		599	616		636	653		677	694		729	746		796	813		929	946		1060	1077		1100	1117		1205	1222
Q99986
morf1
morf2
Q86Y07
morf1
morf2	369	386
Q8IV63
morf1
morf2
Q8IZL9
morf1
morf2
P06493
morf1
morf2
P24941
morf1
morf2
Q00526
morf1
morf2
Q15131
morf1	42	60
morf2	334	351
P11802
morf1
morf2
Q00534
morf1
morf2
Q00535
morf1
morf2	9	26
P50613
morf1
morf2	329	346
P49336
morf1	342	360
morf2	343	360		447	464
Q9BWU1
morf1	340	358
morf2	11	28		341	358		485	502
P50750
morf1
morf2
Q14004
morf1	74	92		633	651		1001	1019		1102	1120		1234	1252		1294	1312
morf2	30	47		75	92		289	306		441	458		473	490		634	651		1002	1019		1103	1120		1177	1194		1235	1252		1295	1312		1361	1378		1450	1467
Q9NYV4
morf1	63	81		409	427		469	487		505	523		1205	1223		1332	1350
morf2	64	81		125	142		245	262		410	427		462	479		506	523		1003	1020		1111	1128		1206	1223		1333	1350
Q00536
morf1
morf2
Q00537
morf1	63	81
morf2	1	18		64	81		119	136		160	177		501	518
Q07002
morf1	90	108
morf2	3	20		33	50		70	87		91	108
O94921
morf1
morf2	1	18		36	53
Q96Q40
morf1
morf2
Q9UQ88
morf1
morf2	55	72		713	730		760	777
O76039
morf1	406	424		514	532		588	606		616	634		674	692		754	772		826	844		901	919		926	944
morf2	335	352		364	381		407	424		437	454		487	504		511	528		540	557		589	606		617	634		675	692		755	772		827	844		856	873		902	919		927	944
Q00532
morf1
morf2	328	345
Q92772
morf1	339	357
morf2	274	291		340	357		382	399
Q8IVW4
morf1	333	351		519	537		574	592
morf2	371	388		413	430		439	456		520	537		575	592
Q5MAI5
morf1
morf2	265	282		298	315
P68400
morf1
morf2
P19784
morf1
morf2
P49759
morf1	4	22
morf2	60	77
P49760
morf1
morf2	85	102
P49761
morf1	136	154
morf2	83	100		137	154		217	234
Q9HAZ1
morf1
morf2	7	24		62	79
Q13627
morf1	596	614
morf2	14	31		86	103		544	561		597	614		684	701
Q9Y463
morf1
morf2	483	500
O43781
morf1	27	45
morf2	28	45
Q92630
morf1
morf2	116	133		163	180		546	563		582	599
Q9NR20
morf1
morf2
Q9H422
morf1	837	855		891	909
morf2	838	855		892	909		1009	1026
Q9H2X6
morf1
morf2	851	868		907	924		958	975		1036	1053
Q8NE63
morf1	497	515		575	593
morf2	498	515		576	593		599	616
Q86Z02
morf1
morf2	24	41		816	833		985	1002		1074	1091
Q13523
morf1	546	564
morf2	501	518		547	564
P49840
morf1
morf2	466	483
P49841
morf1
morf2	14	31
P28482
morf1
morf2	334	351
P27361
morf1
morf2	354	371
P31152
morf1	348	366
morf2	349	366		434	451		488	505		543	560
Q16659
morf1
morf2	668	685		704	721
Q13164
morf1	387	405		465	483		558	576		715	733
morf2	388	405		466	483		559	576		716	733		799	816
Q8TD08
morf1
morf2	247	264		463	480
P45983
morf1
morf2	410	427
P45984
morf1
morf2	407	424
P53779
morf1	446	464
morf2	447	464
Q9UBE8
morf1
morf2
Q16539
morf1
morf2	329	346
Q15759
morf1
morf2	331	348
O15264
morf1
morf2	292	309		331	348
P53778
morf1
morf2	332	349
P20794
morf1	362	380
morf2	363	380		405	422
Q9UQ07
morf1	345	363
morf2	312	329		346	363
Q9UPZ9
morf1	413	431
morf2	284	301		349	366		371	388		414	431		496	513		552	569		589	606
Q96SB4
morf1	1	19		375	393
morf2	1	18		355	372		376	393		426	443
P78362
morf1	418	436
morf2	316	333		374	391		419	436		448	465		498	515
Q9UPE1
morf1
morf2	349	366
O14965
morf1
morf2	2	19		22	39		113	130		374	391
Q9UQB9
morf1
morf2
Q96GD4
morf1
morf2
O43683
morf1
morf2	282	299		408	425		513	530		653	670
O60566
morf1	393	411		689	707
morf2	188	205		253	270		293	310		353	370		394	411		441	458		652	669		690	707		718	735
Q96S44
morf1
morf2	32	49		236	253
Q96RR4
morf1	1	19		47	65		553	571
morf2	1	18		48	65		107	124		487	504		554	571
Q8N5S9
morf1
morf2	3	20		477	494
O00311
morf1
morf2	9	26
Q8TF76
morf1	194	212		235	253
morf2	3	20		36	53		140	157		236	253		269	286
O15111
morf1
morf2	681	698
O14920
morf1
morf2	538	555		718	735
Q14164
morf1
morf2	495	512		542	559
Q9UHD2
morf1
morf2
O75460
morf1
morf2
Q76MJ5
morf1
morf2	396	413		469	486
Q8TAS1
morf1
morf2
P00540
morf1
morf2
Q2M2I8
morf1	329	347		514	532
morf2	330	347		455	472		493	510		522	539		640	657		858	875		886	903		944	961
Q9NSY1
morf1	393	411		642	660		832	850		955	973
morf2	394	411		440	457		493	510		537	554		606	623		643	660		682	699		817	834		856	873		956	973
O14976
morf1	719	737		973	991		1146	1164
morf2	733	750		780	797		900	917		974	991		1031	1048		1084	1101		1147	1164		1176	1193
O75716
morf1	287	305
morf2	268	285		288	305
Q96PY6
morf1	424	442		480	498		552	570		727	745
morf2	321	338		371	388		425	442		481	498		553	570		636	653		671	688		728	745		913	930		1176	1193
P51956
morf1	359	377
morf2	360	377		489	506
Q6P3R8
morf1
morf2	407	424		458	475		691	708
Q6ZWH5
morf1
morf2	34	51		783	800		824	841		876	893		1145	1162
Q8NG66
morf1	380	398		468	486
morf2	381	398		469	486		524	541
P51955
morf1	362	380
morf2	271	288		363	380		426	443
P51957
morf1	493	511		657	675		699	717
morf2	266	283		320	337		441	458		494	511		557	574		658	675		700	717
Q9HC98
morf1
morf2
Q8TDX7
morf1
morf2
Q8TD19
morf1	801	819		908	926
morf2	2	19		281	298		802	819		840	857		909	926
Q86SG6
morf1
morf2
Q52WX2
morf1
morf2	1	18
P0C263
morf1
morf2	320	337
P0C264
morf1
morf2	24	41		288	305
Q9BXM7
morf1
morf2
Q9H792
morf1	197	215		401	419		790	808		970	988		1050	1068		1185	1203		1237	1255
morf2	365	382		402	419		524	541		791	808		883	900		946	963		971	988		1051	1068		1122	1139		1186	1203		1238	1255
Q86YV5
morf1	16	34		193	211		354	372		1207	1225
morf2	84	101		162	179		194	211		249	266		315	332		355	372		437	454		481	498		617	634		657	674		687	704		722	739		779	796		822	839		865	882		1208	1225
Q8TDR2
morf1	183	201
morf2	18	35		178	195		508	525
Q8N165
morf1
morf2
Q8IWB6
morf1	529	547		572	590		1009	1027		1048	1066		1082	1100		1125	1143		1307	1325		1470	1488
morf2	530	547		573	590		623	640		689	706		731	748		826	843		878	895		926	943		982	999		1010	1027		1049	1066		1083	1100		1126	1143		1308	1325		1471	1488
Q9UHY1
morf1
morf2
Q9NSY0
morf1	37	55
morf2	38	55
Q05823
morf1
morf2
Q9BXU1
morf1
morf2	238	255		638	655		667	684		985	1002
Q9H5K3
morf1
morf2
Q9P2K8
morf1	676	694		1512	1530
morf2	27	44		218	235		677	694		709	726		743	760		971	988
Q9BQI3
morf1	294	312
morf2	295	312		583	600
Q9NZJ5
morf1	714	732		754	772		795	813		826	844
morf2	715	732		755	772		796	813		827	844		1075	1092
P19525
morf1
morf2	534	551
P53350
morf1
morf2	1	18		369	386
Q9H4B4
morf1	4	22		331	349
morf2	5	22		332	349
Q9NYY3
morf1	58	76
morf2	5	22		59	76		387	404		440	457
O00444
morf1	825	843
morf2	361	378		425	442		532	549		826	843
Q6P3W7
morf1
morf2	635	652		681	698		710	727		765	782		843	860		893	910
Q8IZE3
morf1	548	566		606	624		662	680
morf2	513	530		549	566		607	624		701	718
Q96KG9
morf1	660	678		724	742
morf2	661	678		686	703		739	756		791	808
Q8NE28
morf1
morf2
Q504Y2
morf1	7	25		55	73		134	152
morf2	56	73
Q6XUX3
morf1
morf2	17	34		426	443
Q7Z7A4
morf1
morf2	435	452		553	570
Q8TEA7
morf1
morf2
Q9UKI8
morf1	55	73		203	221		305	323		374	392		748	766
morf2	56	73		84	101		139	156		204	221		306	323		375	392		395	412		430	447		749	766
Q86UE8
morf1	77	95		195	213		300	318
morf2	14	31		78	95		163	180		196	213		236	253		301	318		383	400		402	419
Q96KB5
morf1
morf2
P33981
morf1
morf2
Q9NRP7
morf1	353	371
morf2	285	302		310	327		354	371
O75385
morf1	441	459		549	567		613	631		687	705
morf2	254	271		338	355		442	459		557	574		614	631		688	705
Q8IYT8
morf1	254	272		357	375		438	456		532	550		662	680
morf2	358	375		439	456		483	500		533	550		583	600		605	622		663	680		761	778
Q6PHR2
morf1
morf2	349	366		424	441		455	472
Q96C45
morf1	260	278
morf2	261	278		323	340		386	403
Q99570
morf1	853	871
morf2	854	871		932	949
P30291
morf1	12	30		128	146		256	274
morf2	13	30		129	146		178	195		257	274		563	580
Q99640
morf1	27	45		105	123
morf2	28	45		69	86		106	123		369	386		467	484
Q9H4A3
morf1	39	57		71	89		1212	1230		1248	1266		1295	1313		1938	1956		1983	2001		2016	2034
morf2	40	57		72	89		581	598		1249	1266		1296	1313		1325	1342		1491	1508		1523	1540		1856	1873		1939	1956		1984	2001		2017	2034		2092	2109		2187	2204		2241	2258		2351	2368
Q96J92
morf1	572	590		615	633		1107	1125		1145	1163
morf2	573	590		616	633		790	807		867	884		907	924		1108	1125		1146	1163		1226	1243
Q9BYP7
morf1	46	64		507	525		1114	1132		1159	1177		1475	1493
morf2	38	55		460	477		508	525		549	566		618	635		691	708		865	882		1030	1047		1115	1132		1328	1345		1394	1411		1476	1493		1496	1513		1544	1561		1772	1789
Q9Y3S1
morf1	1151	1169		1207	1225		1301	1319		1699	1717		1783	1801
morf2	37	54		199	216		692	709		1152	1169		1302	1319		1354	1371		1386	1403		1583	1600		1616	1633		1700	1717		1784	1801		1867	1884		1899	1916		1934	1951		1963	1980		1999	2016		2062
P25092
morf1
morf2
P51841
morf1
morf2	797	814		1081	1098
Q02846
morf1
morf2	7	24		815	832		1051	1068
P16066
morf1
morf2	785	802
P20594
morf1
morf2
Q99683
morf1	945	963
morf2	53	70		946	963		985	1002		1009	1026		1048	1065		1234	1251		1277	1294
O95382
morf1	880	898
morf2	11	28		40	57		881	898		1162	1179
Q6ZN16
morf1	917	935		959	977
morf2	918	935		960	977
Q13233
morf1	299	317		456	474		963	981		1016	1034		1085	1103
morf2	291	308		405	422		904	921		964	981		1017	1034		1086	1103		1162	1179		1479	1496
Q56UN5
morf1	34	52		70	88		482	500		558	576		734	752
morf2	26	43		71	88		107	124		155	172		372	389		427	444		483	500		559	576		613	630		735	752		766	783		821	838		990	1007
Q99759
morf1	224	242
morf2	7	24		109	126		225	242		325	342
Q9Y2U5
morf1	6	24		169	187
morf2	7	24		168	185		252	269
Q9Y6R4
morf1	168	186		472	490		1230	1248
morf2	1	18		124	141		217	234		473	490		1231	1248		1281	1298
O95747
morf1
morf2	287	304		324	341
Q9UEW8
morf1
morf2	325	342		370	387
Q12851
morf1	316	334		393	411
morf2	254	271		317	334		351	368		394	411
Q8IVH8
morf1	370	388		430	448
morf2	371	388		431	448		493	510
Q9Y4K4
morf1	400	418
morf2	363	380		401	418
Q92918
morf1	276	294		323	341
morf2	277	294		324	341
O95819
morf1	343	361		512	530		859	877
morf2	267	284		311	328		344	361		481	498		513	530		563	580		651	668		860	877
Q9UKE5
morf1	341	359		512	530		556	574		612	630		646	664		916	934		964	982
morf2	310	327		342	359		461	478		489	506		513	530		557	574		613	630		647	664		703	720		884	901		917	934		965	982
Q7Z2Y5
morf1	727	745		794	812		818	836
morf2	361	378		437	454		589	606		631	648		658	675		728	745		764	781		795	812		819	836		1155	1172
Q8N4C8
morf1	794	812
morf2	311	328		359	376		469	486		504	521		602	619		737	754		795	812		850	867
Q13188
morf1
morf2
Q13043
morf1
morf2	1	18		330	347		411	428
Q8NEV4
morf1	1382	1400		1532	1550		1564	1582
morf2	1277	1294		1342	1359		1383	1400		1503	1520		1533	1550		1565	1582
Q8WXR4
morf1	1205	1223		1269	1287		1301	1319
morf2	1152	1169		1206	1223		1270	1287		1302	1319
Q13153
morf1	31	49
morf2	1	18		32	49
Q13177
morf1	40	58
morf2	21	38		48	65
O75914
morf1
morf2
O96013
morf1
morf2	21	38		79	96		131	148		199	216
Q9NQU5
morf1	22	40		176	194		216	234
morf2	23	40		127	144		177	194		217	234		258	275		355	372
Q9P286
morf1	71	89		304	322
morf2	23	40		72	89		305	322		372	389
O94804
morf1	496	514		882	900
morf2	287	304		497	514		532	549		596	613		652	669		754	771		821	838		883	900		937	954
Q9H2G2
morf1	375	393		578	596
morf2	376	393		472	489		760	777		796	813		868	885		914	931		969	986		1018	1035		1082	1099		1145	1162		1191	1208		1211	1228
Q9C0K7
morf1
morf2	345	362		391	408
Q7RTN6
morf1
morf2	357	374
Q9UL54
morf1	306	324		463	481		1170	1188
morf2	307	324		412	429		464	481		565	582		633	650		668	685		689	706		865	882		1139	1156
Q9H2K8
morf1	391	409		424	442
morf2	303	320		392	409		425	442		478	495		597	614		659	676		730	747		804	821		877	894
Q7L7X3
morf1	878	896
morf2	430	447		596	613		667	684		726	743		769	786		804	821		826	843		879	896		984	1001
Q9Y6E0
morf1	330	348
morf2	331	348
O00506
morf1
morf2	270	287		318	335		360	377
Q9P289
morf1
morf2	319	336		343	360
Q02750
morf1
morf2	300	317
P36507
morf1
morf2	1	18		45	62
P46734
morf1	46	64
morf2
P52564
morf1
morf2	8	25
P45985
morf1	46	64
morf2	47	64
Q13163
morf1
morf2
O14733
morf1
morf2	71	88
P41279
morf1
morf2
Q99558
morf1	645	663
morf2	116	133		327	344		646	663
P00519
morf1	924	942
morf2	5	22		643	660		725	742		826	843		925	942		997	1014
P42684
morf1	41	59		1014	1032
morf2	42	59		578	595		639	656		799	816		876	893		941	958		1015	1032		1078	1095
Q07912
morf1	79	97		814	832		908	926
morf2	80	97		516	533		640	657		697	714		815	832		851	868		909	926
Q13470
morf1
morf2	73	90
Q9UM73
morf1	1491	1509
morf2	208	225		675	692		897	914		1464	1481		1492	1509
P29376
morf1
morf2	212	229		303	320		821	838		847	864
P30530
morf1
morf2	851	868
Q06418
morf1
morf2	873	890
Q12866
morf1
morf2
Q13308
morf1
morf2	799	816		1035	1052
P41240
morf1
morf2
P42679
morf1
morf2	452	469
Q08345
morf1
morf2	502	519		535	552		569	586
Q16832
morf1	467	485
morf2	468	485
P00533
morf1
morf2	1053	1070		1082	1099
P04626
morf1	1044	1062		1083	1101
morf2	1045	1062		1084	1101		1175	1192
P21860
morf1	1218	1236
morf2	1219	1236		1259	1276
Q15303
morf1	1025	1043
morf2	1026	1043		1099	1116		1287	1304
P29317
morf1	310	328		347	365
morf2	311	328		409	426
P21709
morf1	246	264		278	296
morf2	286	303		446	463
P29320
morf1
morf2
P54764
morf1
morf2
P54756
morf1
morf2
Q15375
morf1
morf2
P29322
morf1
morf2
P54762
morf1
morf2
P29323
morf1
morf2	1038	1055
P54753
morf1
morf2	315	332
P54760
morf1	256	274
morf2	257	274
O15197
morf1	381	399
morf2	294	311		341	358
Q5JZY3
morf1
morf2
Q9UF33
morf1
morf2
Q14289
morf1	728	746		764	782
morf2	729	746		765	782		819	836
Q05397
morf1	690	708		728	746		776	794		837	855
morf2	397	414		652	669		691	708		729	746		838	855
P16591
morf1
morf2	299	316		360	377
P07332
morf1
morf2	38	55		72	89		116	133		309	326		363	380
P11362
morf1
morf2	100	117
P22607
morf1	73	91
morf2	105	122
P21802
morf1
morf2
P22455
morf1	1	19
morf2
P08069
morf1
morf2	706	723		1271	1288		1331	1348
P06213
morf1	1331	1349
morf2	715	732		764	781		1341	1358
P14616
morf1
morf2	706	723
P23458
morf1
morf2
O60674
morf1
morf2
P52333
morf1
morf2	13	30
P29597
morf1	787	805
morf2	315	332		578	595		829	846
Q6ZMQ8
morf1	678	696		938	956		988	1006
morf2	408	425		575	592		627	644		672	689		738	755		878	895		939	956		989	1006		1093	1110		1219	1236		1298	1315		1334	1351
Q8IWU2
morf1	620	638		853	871
morf2	621	638		773	790		854	871		897	914		949	966		1006	1023		1091	1108		1320	1337		1349	1366		1424	1441		1466	1483
Q96Q04
morf1	451	469		676	694		853	871		1225	1243		1349	1367
morf2	432	449		452	469		476	493		538	555		590	607		677	694		854	871		988	1005		1016	1033		1226	1243		1350	1367		1414	1431
P08581
morf1
morf2
Q04912
morf1
morf2
O15146
morf1
morf2
P07333
morf1	954	972
morf2	701	718		955	972
P36888
morf1
morf2	744	761		964	981
P10721
morf1
morf2
P16234
morf1
morf2	1072	1089
P09619
morf1
morf2	440	457		1007	1024
P07949
morf1	554	572
morf2	502	519		555	572		1013	1030
Q01973
morf1
morf2	742	759		803	820
Q01974
morf1
morf2	790	807		825	842		926	943
P34925
morf1
morf2
P08922
morf1	2314	2332
morf2	2315	2332
P42685
morf1
morf2
P09769
morf1
morf2	477	494		501	518
P06241
morf1
morf2	1	18
P12931
morf1
morf2
P07947
morf1
morf2	1	18		511	528
P51451
morf1
morf2	28	45
P08631
morf1
morf2	27	44		501	518
P06239
morf1
morf2
P07948
morf1	15	33
morf2	16	33
Q13882
morf1
morf2
Q9H3Y6
morf1
morf2
P43405
morf1	317	335
morf2	283	300		318	335
P43403
morf1
morf2	5	22		279	296
P51813
morf1
morf2	185	202		228	245		262	279
Q06187
morf1
morf2	54	71
Q08881
morf1
morf2
P42680
morf1
morf2
P42681
morf1
morf2	7	24
Q02763
morf1
morf2
P35590
morf1
morf2
Q6J9G0
morf1
morf2
P04629
morf1
morf2
Q16620
morf1
morf2
Q16288
morf1
morf2
P17948
morf1	1301	1319
morf2	1302	1319
P35916
morf1	1293	1311
morf2	948	965		980	997		1252	1269		1294	1311		1331	1348
P35968
morf1
morf2	956	973		1274	1291		1314	1331
P51617
morf1	516	534
morf2	135	152		596	613		666	683
O43187
morf1
morf2	137	154		497	514
Q9Y616
morf1	498	516
morf2	453	470		499	516		572	589
Q9NWZ3
morf1
morf2	413	430
P53667
morf1
morf2
P53671
morf1
morf2	243	260
Q15569
morf1	359	377
morf2	360	377		489	506		527	544
Q96S53
morf1	493	511
morf2	367	384		494	511		554	571
Q38SD2
morf1
morf2	65	82		1822	1839
Q5S007
morf1
morf2	911	928		957	974
Q59H18
morf1
morf2	14	31		757	774		803	820
Q13418
morf1
morf2	154	171
Q12852
morf1	11	29		509	527		589	607		695	713
morf2	12	29		417	434		468	485		510	527		590	607		696	713		735	752
O43283
morf1	509	527		831	849
morf2	23	40		66	83		449	466		468	485		510	527		598	615		661	678		711	728		832	849		949	966
P80192
morf1	1	19		518	536		558	576		630	648		816	834		878	896		1051	1069		1086	1104
morf2	1	18		50	67		519	536		559	576		631	648		692	709		748	765		817	834		837	854		879	896		964	981		1002	1019		1070	1087
Q02779
morf1	593	611		748	766		807	825		895	913
morf2	370	387		470	487		594	611		719	736		749	766		808	825		857	874		896	913		937	954
Q80XI6
morf1	642	660		812	830
morf2	389	406		440	457		513	530		581	598		643	660		813	830
Q5TCX8
morf1	512	530		623	641		742	760		855	873
morf2	40	57		414	431		476	493		513	530		559	576		624	641		657	674		721	738		743	760		802	819		856	873		924	941		976	993		999	1016		1019	1036
O43318
morf1	414	432
morf2	286	303		315	332		345	362		415	432		517	534		575	592
Q9NYL2
morf1
morf2	595	612		646	663		716	733		756	773
Q8IVT5
morf1	416	434
morf2	155	172		252	269		417	434
Q6VAB6
morf1	212	230		493	511
morf2	23	40		213	230		303	320		494	511		559	576		899	916		933	950
P10398
morf1	189	207
morf2	190	207		229	246		589	606
P15056
morf1	361	379
morf2	362	379		707	724
P04049
morf1	228	246
morf2	229	246		266	283
Q13546
morf1	374	392
morf2	344	361		375	392		416	433
O43353
morf1
morf2	310	327
Q9Y572
morf1	432	450
morf2	258	275		348	365		433	450		453	470		500	517
P57078
morf1	366	384		422	440
morf2	367	384		423	440
Q8NFD2
morf1
morf2
Q04771
morf1
morf2
P36896
morf1
morf2
P37023
morf1
morf2
P36894
morf1
morf2
O00238
morf1	36	54		123	141
morf2	37	54
P36897
morf1
morf2
Q8NER5
morf1
morf2
P27037
morf1
morf2
Q13705
morf1
morf2
Q16671
morf1	542	560
morf2	101	118		501	518		543	560
Q13873
morf1	640	658		879	897
morf2	474	491		505	522		554	571		641	658		666	683		717	734		759	776		780	797		880	897
P37173
morf1
morf2	550	567
Q8NB16
morf1
morf2	32	49		137	154		448	465
[truncated: 77 more columns]
